# Supplementary material for: First Total Syntheses and Antimicrobial Evaluation of Penicimonoterpene, a Marine-Derived Monoterpenoid, and Its Various Derivatives
Source: MDPI journal article supplement (doi:10.3390/md12063352), 2014-06-03

## Supplementary Information

|                    |                                                                |
|--------------------|----------------------------------------------------------------|
| <b>Figure S1.</b>  | $^1\text{H}$ NMR spectrum of compound <b>1</b> .               |
| <b>Figure S2.</b>  | $^{13}\text{C}$ NMR spectrum of compound <b>1</b> .            |
| <b>Figure S3.</b>  | HRMS spectrum of compound <b>1</b> .                           |
| <b>Figure S4.</b>  | $^1\text{H}$ NMR spectrum of compound <b>2a</b> .              |
| <b>Figure S5.</b>  | $^{13}\text{C}$ NMR spectrum of compound <b>2a</b> .           |
| <b>Figure S6.</b>  | HRMS spectrum of compound <b>2a</b> .                          |
| <b>Figure S7.</b>  | $^1\text{H}$ NMR spectrum of compound <b>2b</b> .              |
| <b>Figure S8.</b>  | $^{13}\text{C}$ NMR spectrum of compound <b>2b</b> .           |
| <b>Figure S9.</b>  | HRMS spectrum of compound <b>2b</b> .                          |
| <b>Figure S10.</b> | $^1\text{H}$ NMR spectrum of compound <b>3a</b> .              |
| <b>Figure S11.</b> | $^{13}\text{C}$ NMR spectrum of compound <b>3a</b> .           |
| <b>Figure S12.</b> | NOESY spectrum of compound <b>3a</b> .                         |
| <b>Figure S13.</b> | An enlarged area of the NOESY spectrum of compound <b>3a</b> . |
| <b>Figure S14.</b> | HRMS spectrum of compound <b>3a</b> .                          |
| <b>Figure S15.</b> | $^1\text{H}$ NMR spectrum of compound <b>3b</b> .              |
| <b>Figure S16.</b> | $^{13}\text{C}$ NMR spectrum of compound <b>3b</b> .           |
| <b>Figure S17.</b> | HRMS spectrum of compound <b>3b</b> .                          |
| <b>Figure S18.</b> | $^1\text{H}$ NMR spectrum of compound <b>4a</b> .              |
| <b>Figure S19.</b> | $^{13}\text{C}$ NMR spectrum of compound <b>4a</b> .           |
| <b>Figure S20.</b> | HRMS spectrum of compound <b>4a</b> .                          |
| <b>Figure S21.</b> | $^1\text{H}$ NMR spectrum of compound <b>4b</b> .              |
| <b>Figure S22.</b> | $^{13}\text{C}$ NMR spectrum of compound <b>4b</b> .           |
| <b>Figure S23.</b> | HRMS spectrum of compound <b>4b</b> .                          |
| <b>Figure S24.</b> | $^1\text{H}$ NMR spectrum of compound <b>5</b> .               |
| <b>Figure S25.</b> | $^{13}\text{C}$ NMR spectrum of compound <b>5</b> .            |
| <b>Figure S26.</b> | HRMS spectrum of compound <b>5</b> .                           |
| <b>Figure S27.</b> | $^1\text{H}$ NMR spectrum of compound <b>6</b> .               |
| <b>Figure S28.</b> | $^{13}\text{C}$ NMR spectrum of compound <b>6</b> .            |
| <b>Figure S29.</b> | HRMS spectrum of compound <b>6</b> .                           |
| <b>Figure S30.</b> | $^1\text{H}$ NMR spectrum of compound <b>7</b> .               |
| <b>Figure S31.</b> | $^{13}\text{C}$ NMR spectrum of compound <b>7</b> .            |
| <b>Figure S32.</b> | $^1\text{H}$ NMR spectrum of compound <b>8a</b> .              |
| <b>Figure S33.</b> | $^{13}\text{C}$ NMR spectrum of compound <b>8a</b> .           |
| <b>Figure S34.</b> | HRMS spectrum of compound <b>8a</b> .                          |
| <b>Figure S35.</b> | $^1\text{H}$ NMR spectrum of compound <b>8b</b> .              |
| <b>Figure S36.</b> | $^{13}\text{C}$ NMR spectrum of compound <b>8b</b> .           |
| <b>Figure S37.</b> | HRMS spectrum of compound <b>8b</b> .                          |
| <b>Figure S38.</b> | $^1\text{H}$ NMR spectrum of compound <b>8c</b> .              |
| <b>Figure S39.</b> | $^{13}\text{C}$ NMR spectrum of compound <b>8c</b> .           |
| <b>Figure S40.</b> | HRMS spectrum of compound <b>8c</b> .                          |
| <b>Figure S41.</b> | $^1\text{H}$ NMR spectrum of compound <b>9a</b> .              |

|                    |                                                      |
|--------------------|------------------------------------------------------|
| <b>Figure S42.</b> | $^{13}\text{C}$ NMR spectrum of compound <b>9a</b> . |
| <b>Figure S43.</b> | HRMS spectrum of compound <b>9a</b> .                |
| <b>Figure S44.</b> | $^1\text{H}$ NMR spectrum of compound <b>9b</b> .    |
| <b>Figure S45.</b> | $^{13}\text{C}$ NMR spectrum of compound <b>9b</b> . |
| <b>Figure S46.</b> | HRMS spectrum of compound <b>9b</b> .                |
| <b>Figure S47.</b> | $^1\text{H}$ NMR spectrum of compound <b>10</b> .    |
| <b>Figure S48.</b> | $^{13}\text{C}$ NMR spectrum of compound <b>10</b> . |
| <b>Figure S49.</b> | HRMS spectrum of compound <b>10</b> .                |
| <b>Figure S50.</b> | $^1\text{H}$ NMR spectrum of compound <b>11</b> .    |
| <b>Figure S51.</b> | $^{13}\text{C}$ NMR spectrum of compound <b>11</b> . |
| <b>Figure S52.</b> | HRMS spectrum of compound <b>11</b> .                |
| <b>Figure S53.</b> | $^1\text{H}$ NMR spectrum of compound <b>12</b> .    |
| <b>Figure S54.</b> | $^{13}\text{C}$ NMR spectrum of compound <b>12</b> . |
| <b>Figure S55.</b> | HRMS spectrum of compound <b>12</b> .                |
| <b>Figure S56.</b> | $^1\text{H}$ NMR spectrum of compound <b>13</b> .    |
| <b>Figure S57.</b> | $^{13}\text{C}$ NMR spectrum of compound <b>13</b> . |
| <b>Figure S58.</b> | HRMS spectrum of compound <b>13</b> .                |
| <b>Figure S59.</b> | $^1\text{H}$ NMR spectrum of compound <b>14</b> .    |
| <b>Figure S60.</b> | $^{13}\text{C}$ NMR spectrum of compound <b>14</b> . |
| <b>Figure S61.</b> | HRMS spectrum of compound <b>14</b> .                |
| <b>Figure S62.</b> | $^1\text{H}$ NMR spectrum of compound <b>15</b> .    |
| <b>Figure S63.</b> | $^{13}\text{C}$ NMR spectrum of compound <b>15</b> . |
| <b>Figure S64.</b> | HRMS spectrum of compound <b>15</b> .                |
| <b>Figure S65.</b> | $^1\text{H}$ NMR spectrum of compound <b>16</b> .    |
| <b>Figure S66.</b> | $^{13}\text{C}$ NMR spectrum of compound <b>16</b> . |
| <b>Figure S67.</b> | HRMS spectrum of compound <b>16</b> .                |
| <b>Figure S68.</b> | $^1\text{H}$ NMR spectrum of compound <b>17</b> .    |
| <b>Figure S69.</b> | $^{13}\text{C}$ NMR spectrum of compound <b>17</b> . |
| <b>Figure S70.</b> | HRMS spectrum of compound <b>17</b> .                |
| <b>Figure S71.</b> | $^1\text{H}$ NMR spectrum of compound <b>18</b> .    |
| <b>Figure S72.</b> | $^{13}\text{C}$ NMR spectrum of compound <b>18</b> . |
| <b>Figure S73.</b> | HRMS spectrum of compound <b>18</b> .                |
| <b>Figure S74.</b> | $^1\text{H}$ NMR spectrum of compound <b>19</b> .    |
| <b>Figure S75.</b> | $^{13}\text{C}$ NMR spectrum of compound <b>19</b> . |
| <b>Figure S76.</b> | HRMS spectrum of compound <b>19</b> .                |
| <b>Figure S77.</b> | $^1\text{H}$ NMR spectrum of compound <b>20</b> .    |
| <b>Figure S78.</b> | $^{13}\text{C}$ NMR spectrum of compound <b>20</b> . |
| <b>Figure S79.</b> | HRMS spectrum of compound <b>20</b> .                |

**Figure S1.**  $^1\text{H}$  NMR spectrum of compound **1**.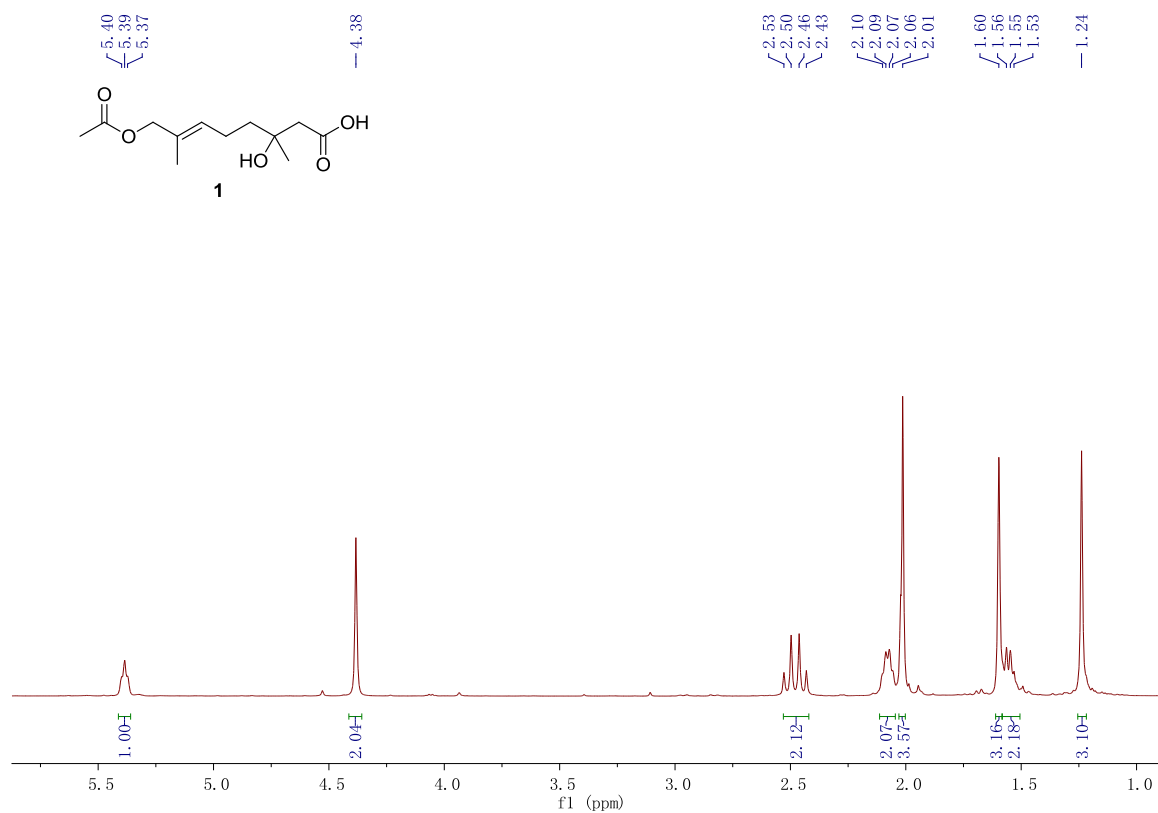**Figure S2.**  $^{13}\text{C}$  NMR spectrum of compound **1**.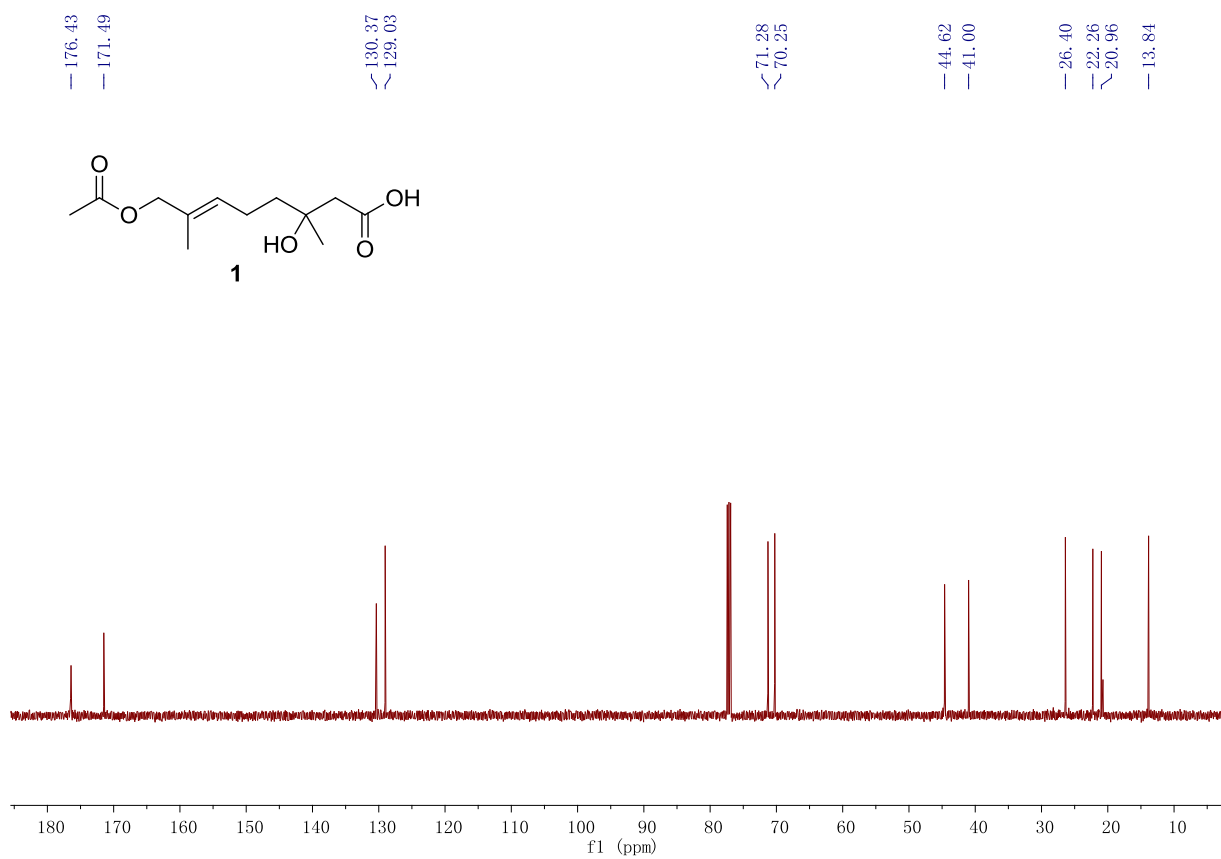

Figure S3. HRMS of compound 1.

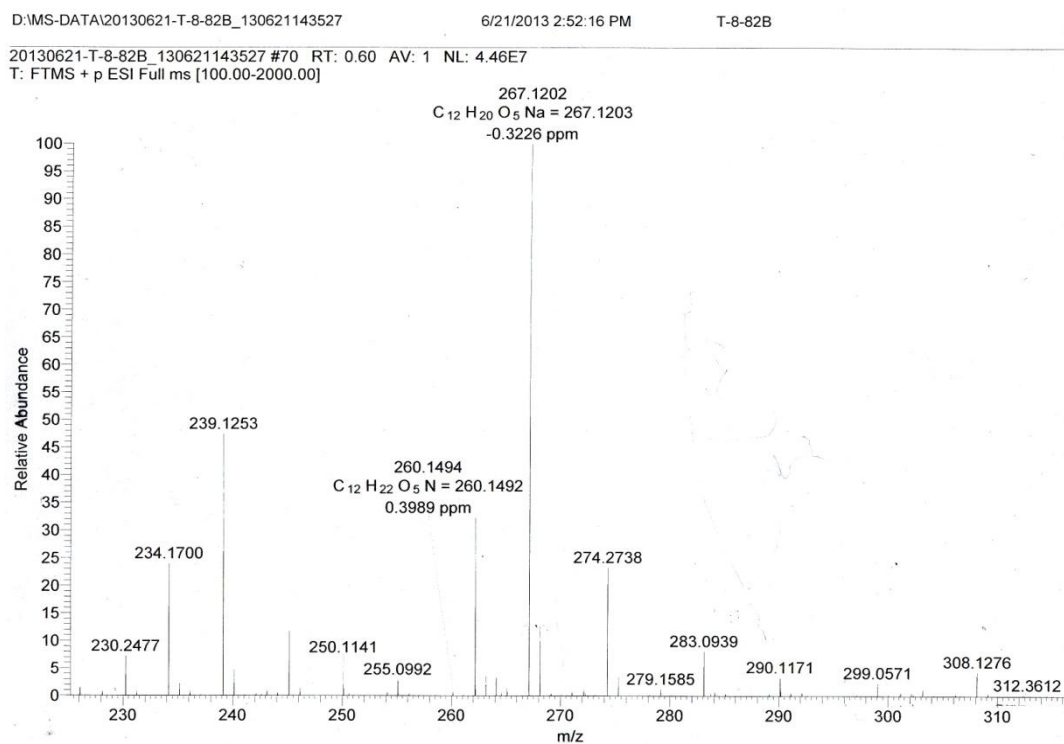Figure S4. <sup>1</sup>H NMR spectrum of compound 2a.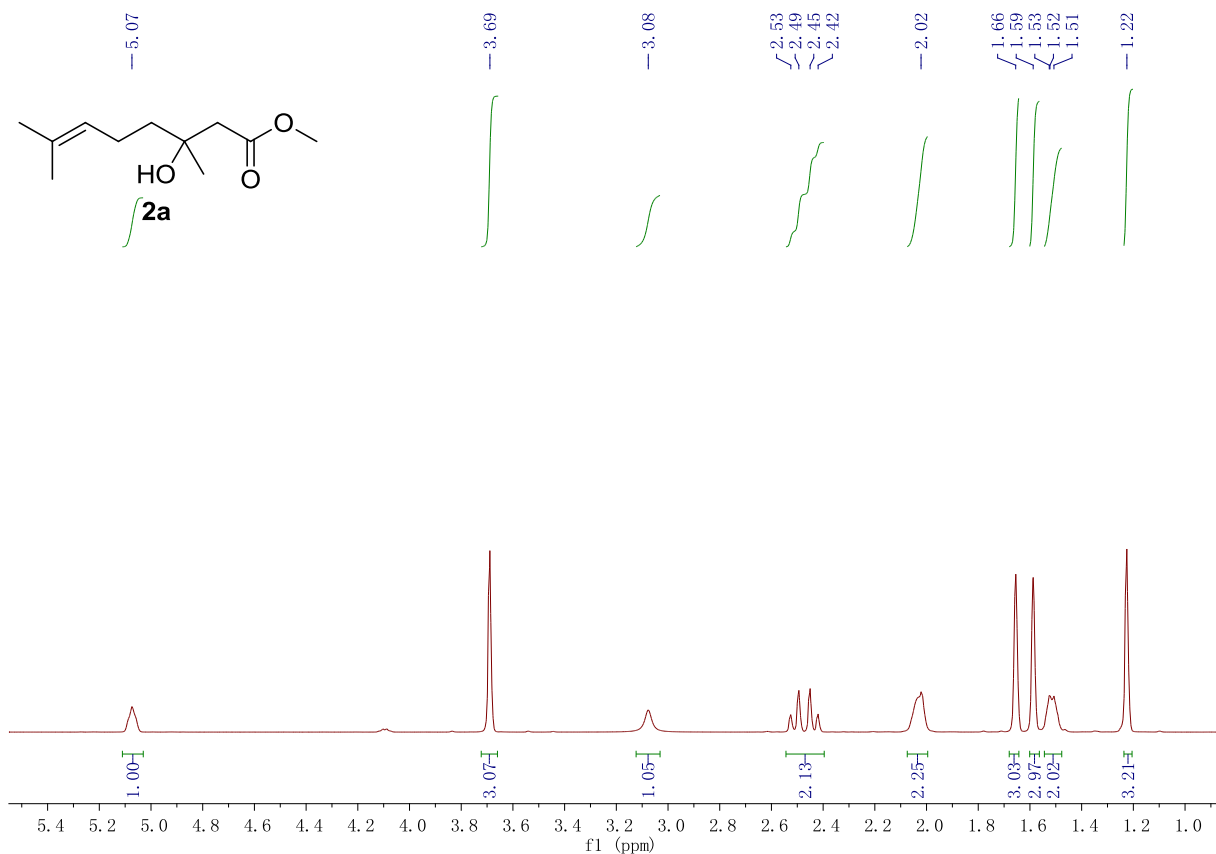

**Figure S5.**  $^{13}\text{C}$  NMR spectrum of compound **2a**.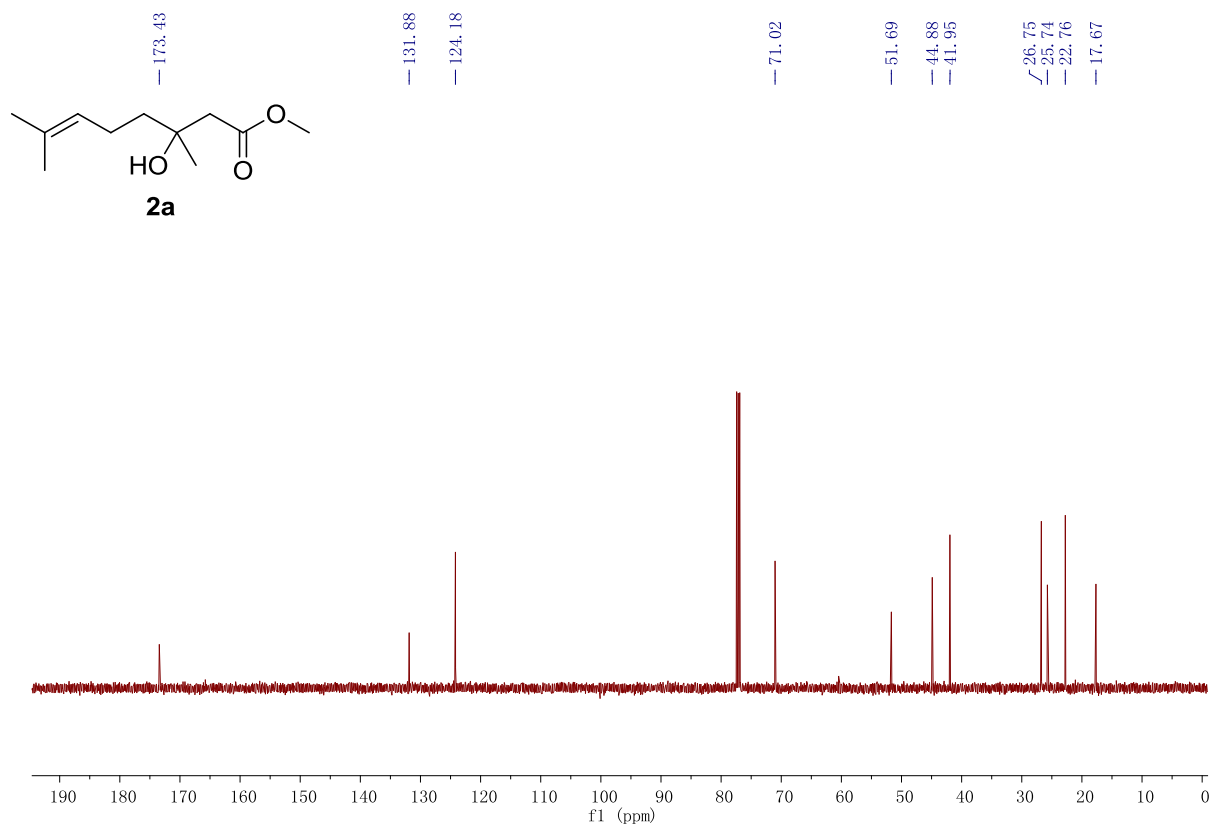**Figure S6.** HRMS of compound **2a**.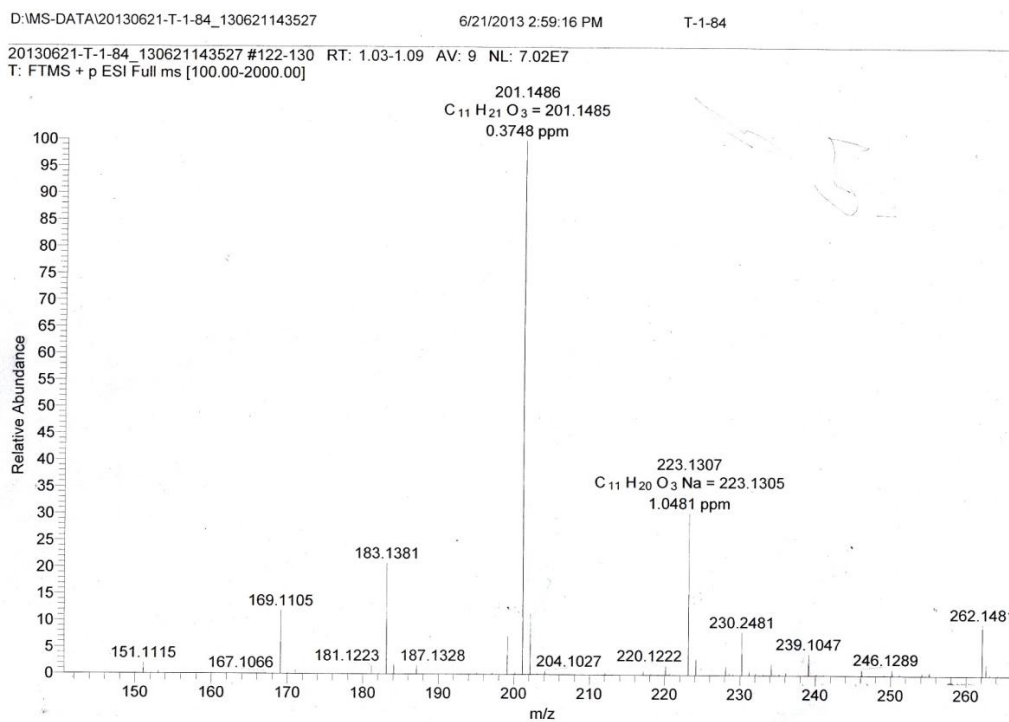

**Figure S7.**  $^1\text{H}$  NMR spectrum of compound 2b.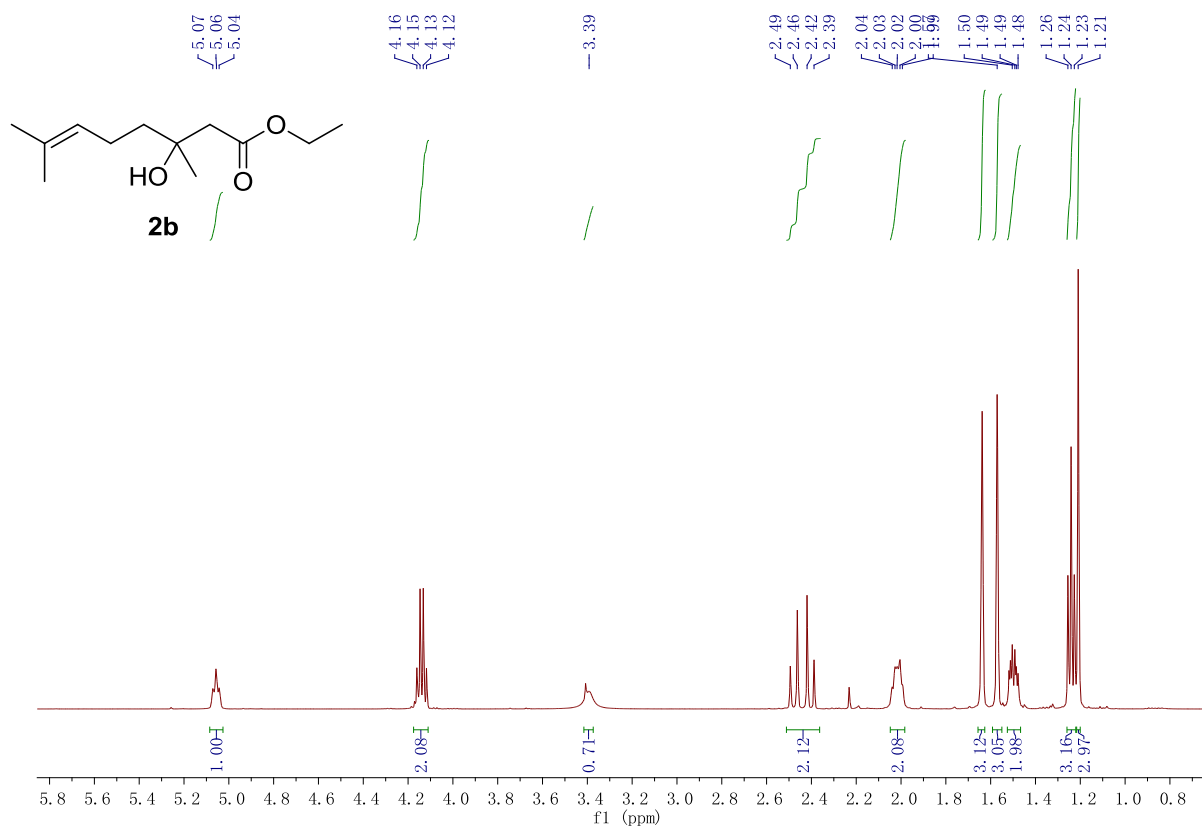**Figure S8.**  $^{13}\text{C}$  NMR spectrum of compound 2b.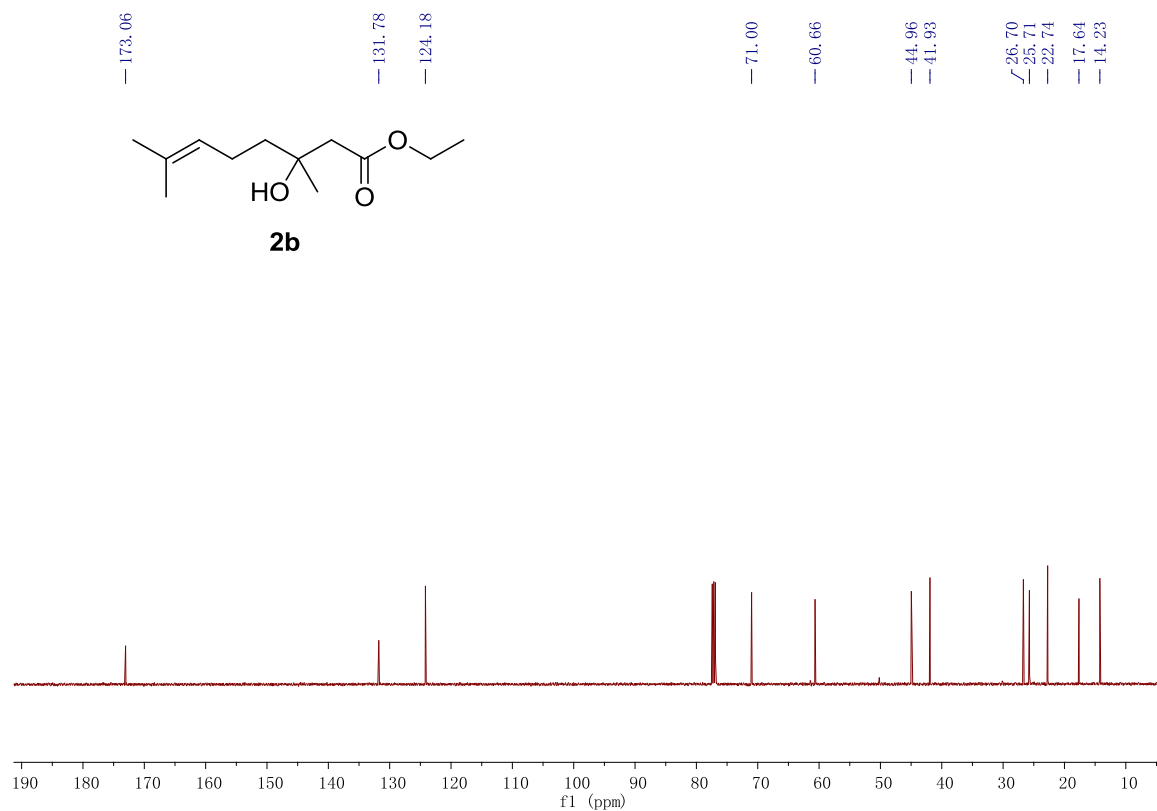

Figure S9. HRMS of compound 2b.

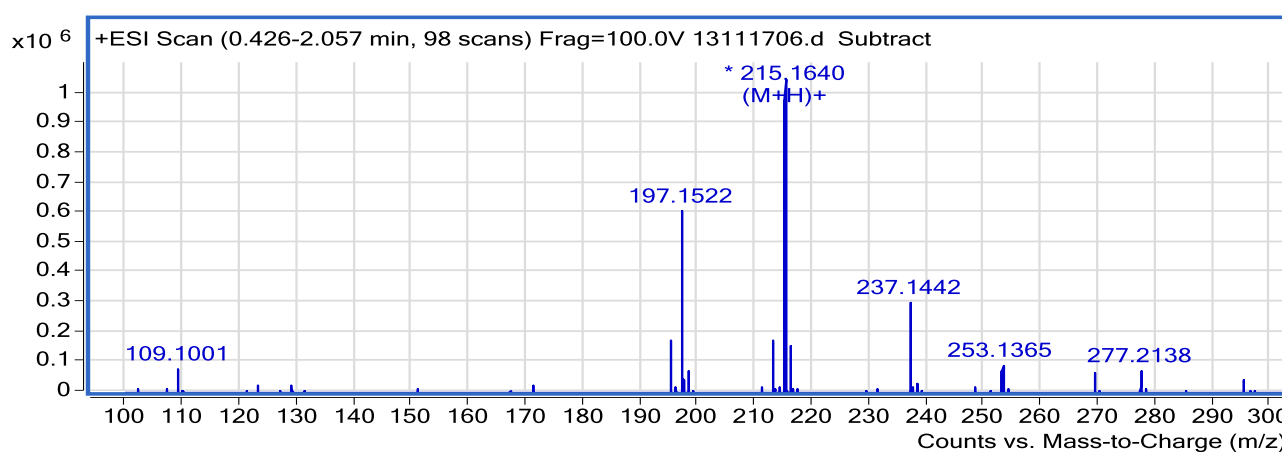Figure S10.  $^1\text{H}$  NMR spectrum of compound 3a.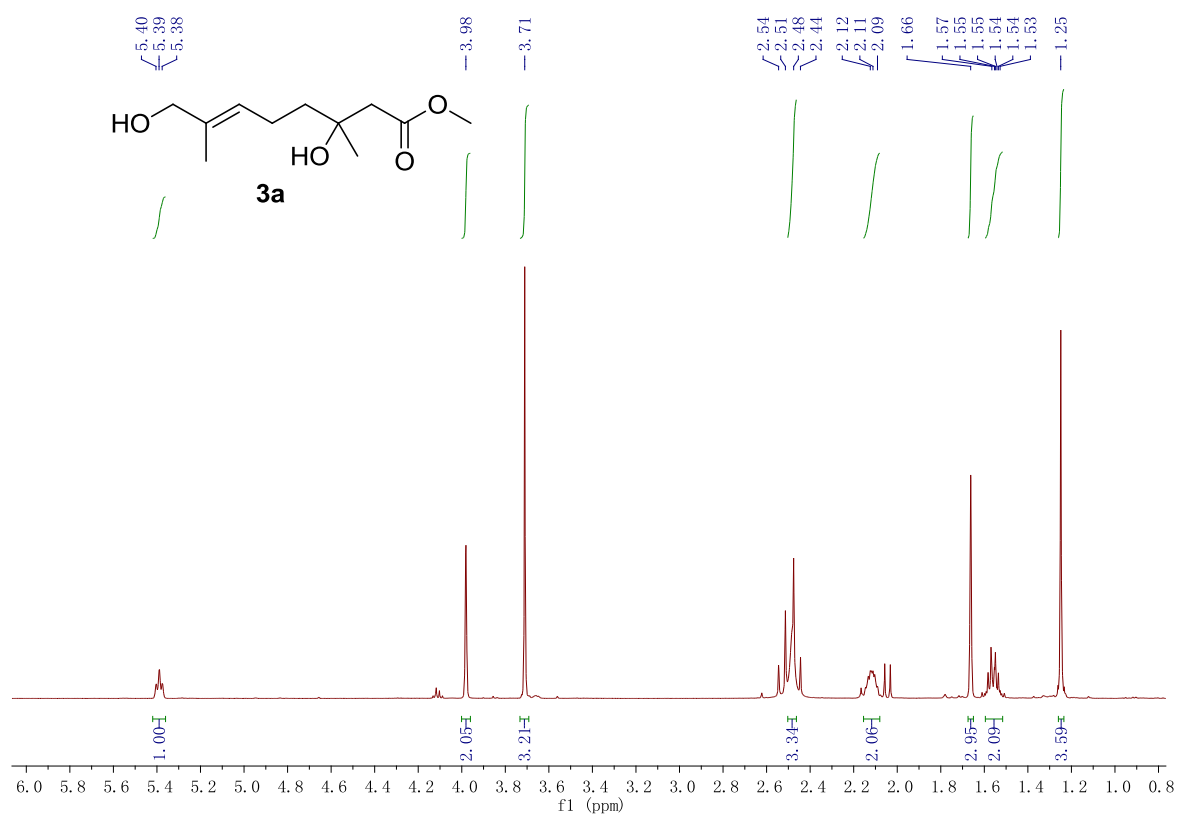

**Figure S11.**  $^{13}\text{C}$  NMR spectrum of compound **3a**.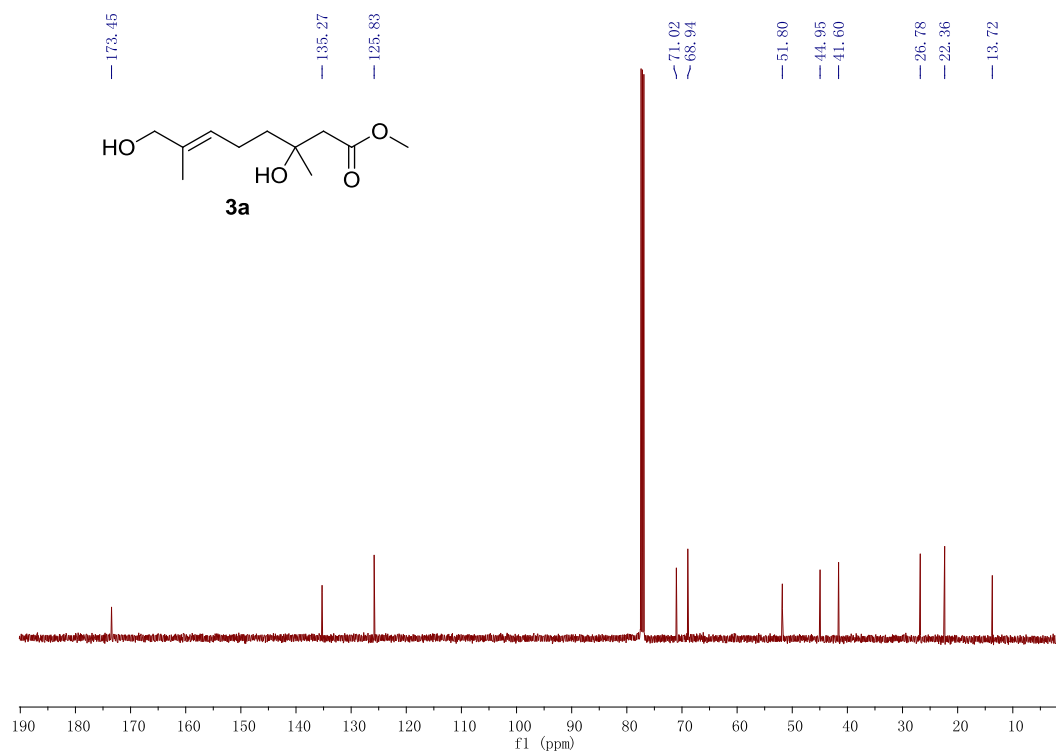**Figure S12.** NOESY spectrum of compound **3a**.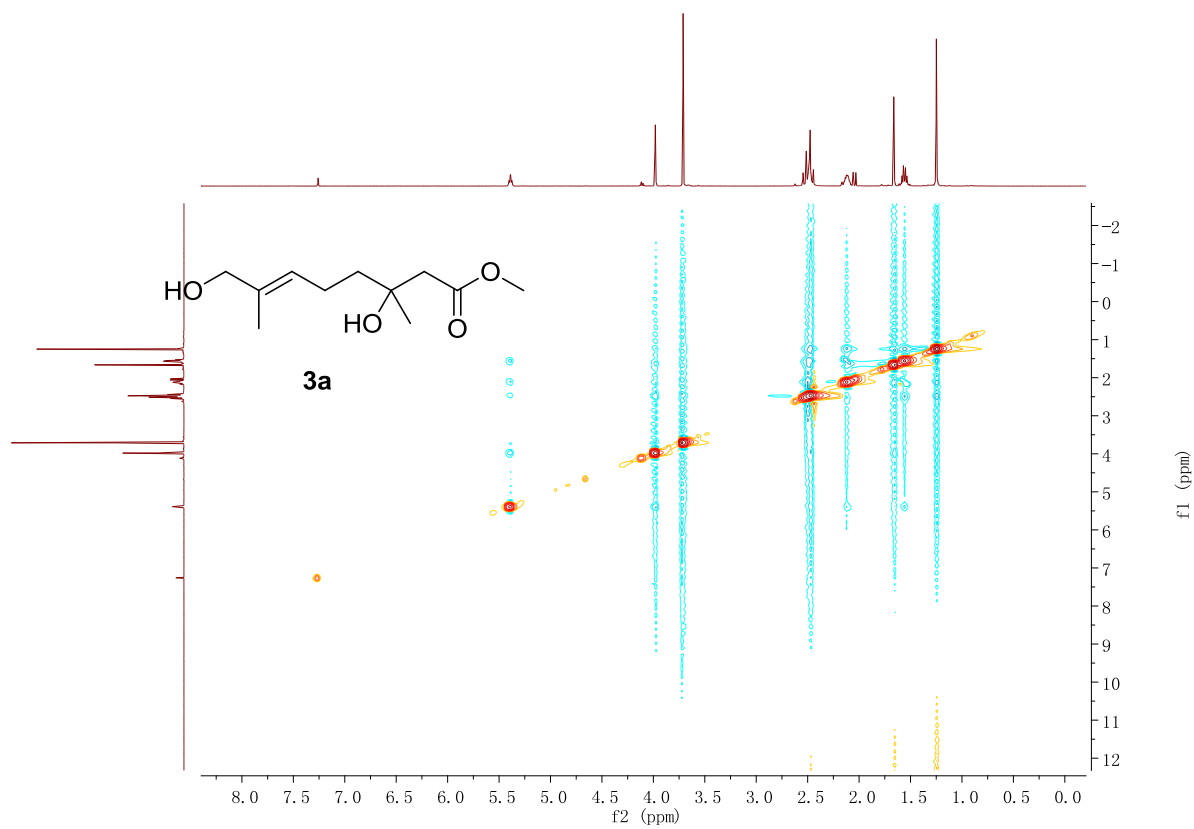



**Figure S13.** An enlarged area of the NOESY spectrum of compound **3a**.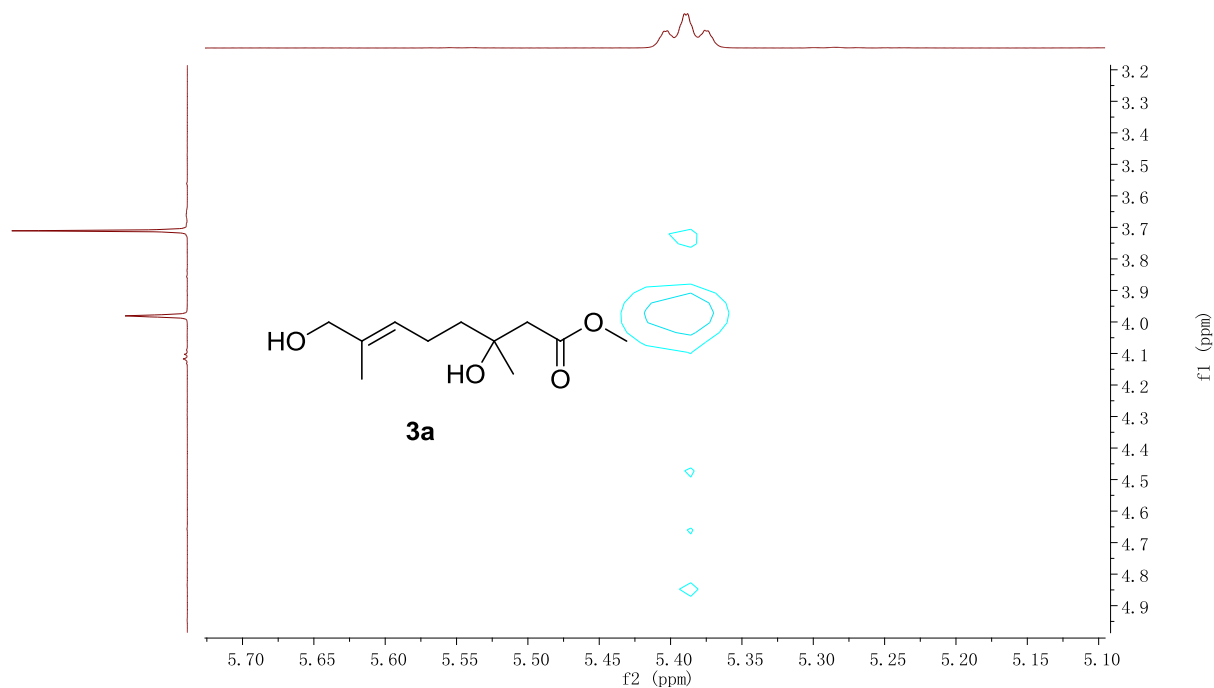**Figure S14.** HRMS of compound **3a**.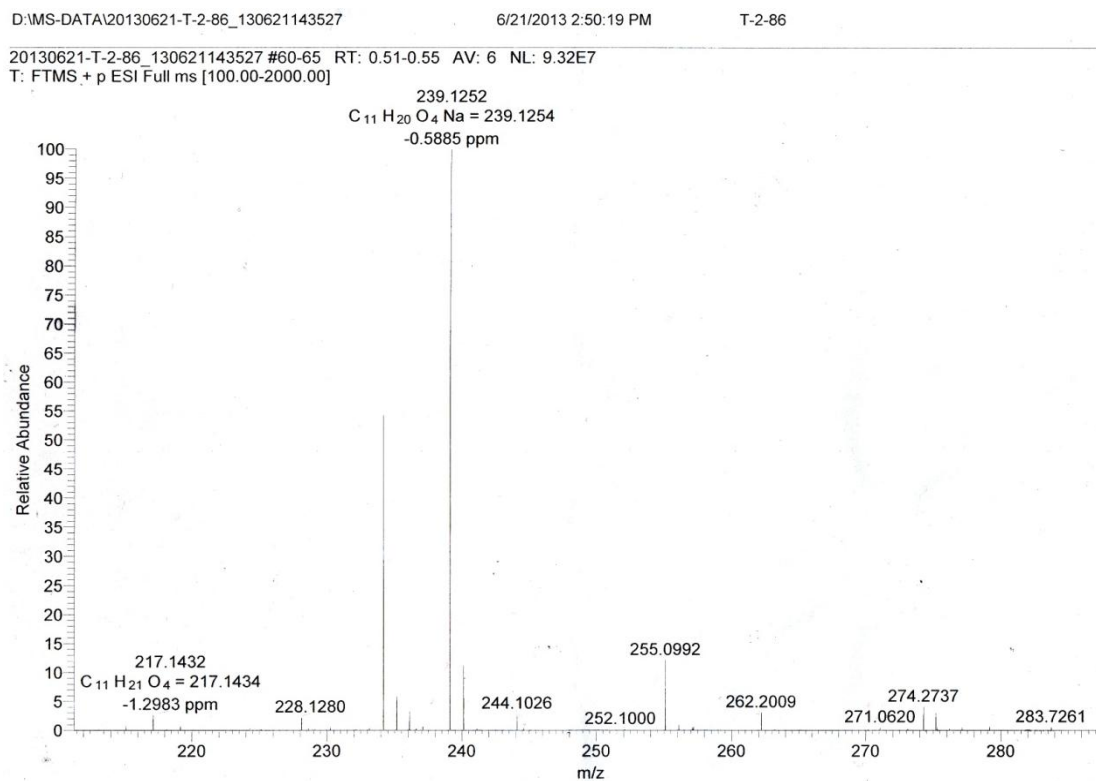

**Figure S15.**  $^1\text{H}$  NMR spectrum of compound **3b**.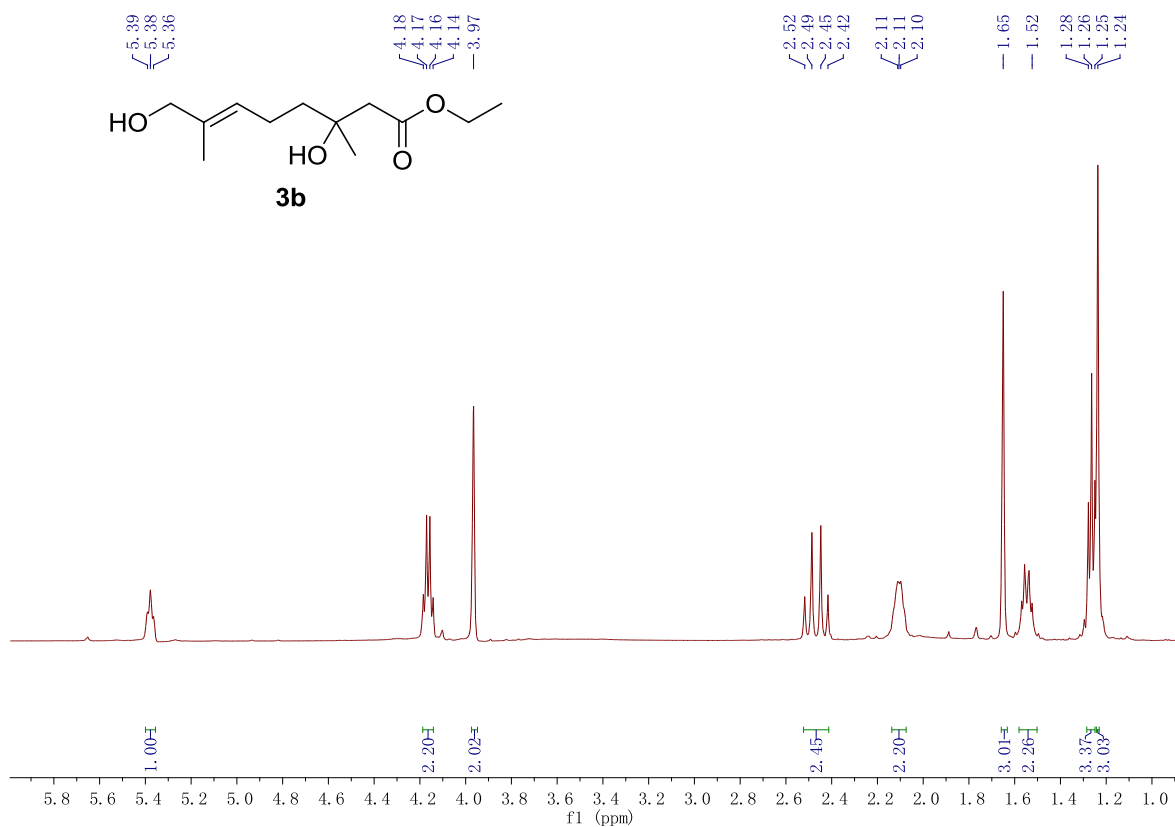**Figure S16.**  $^{13}\text{C}$  NMR spectrum of compound **3b**.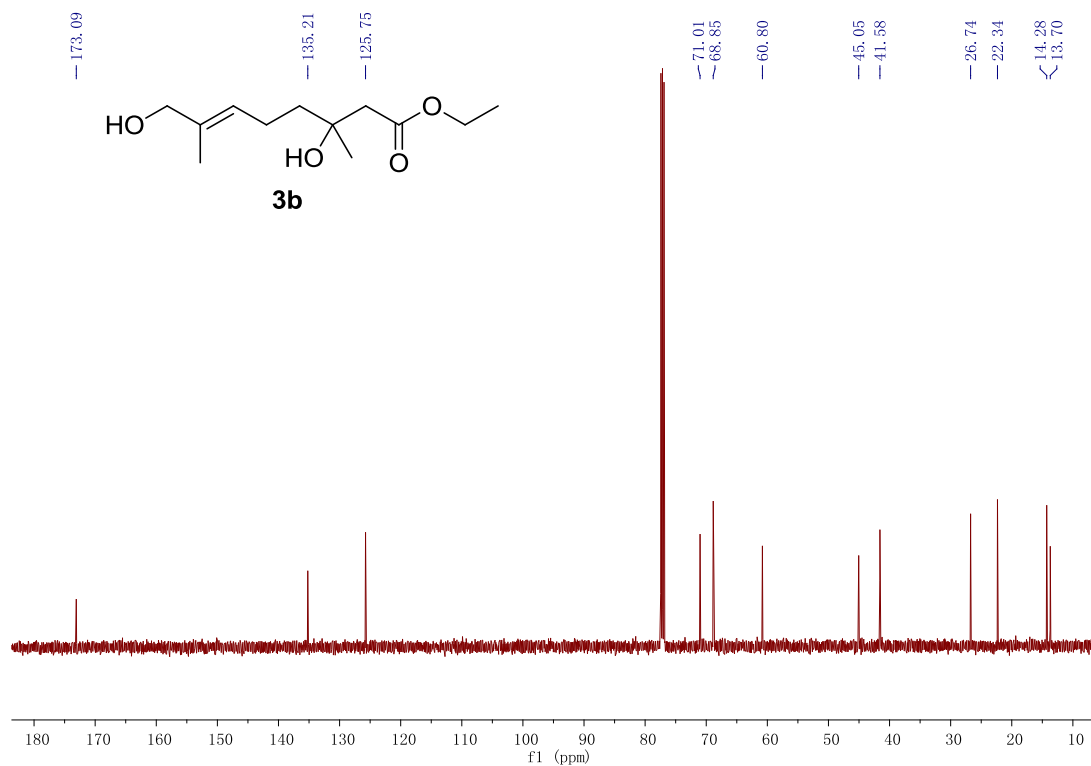

Figure S17. HRMS of compound 3b.

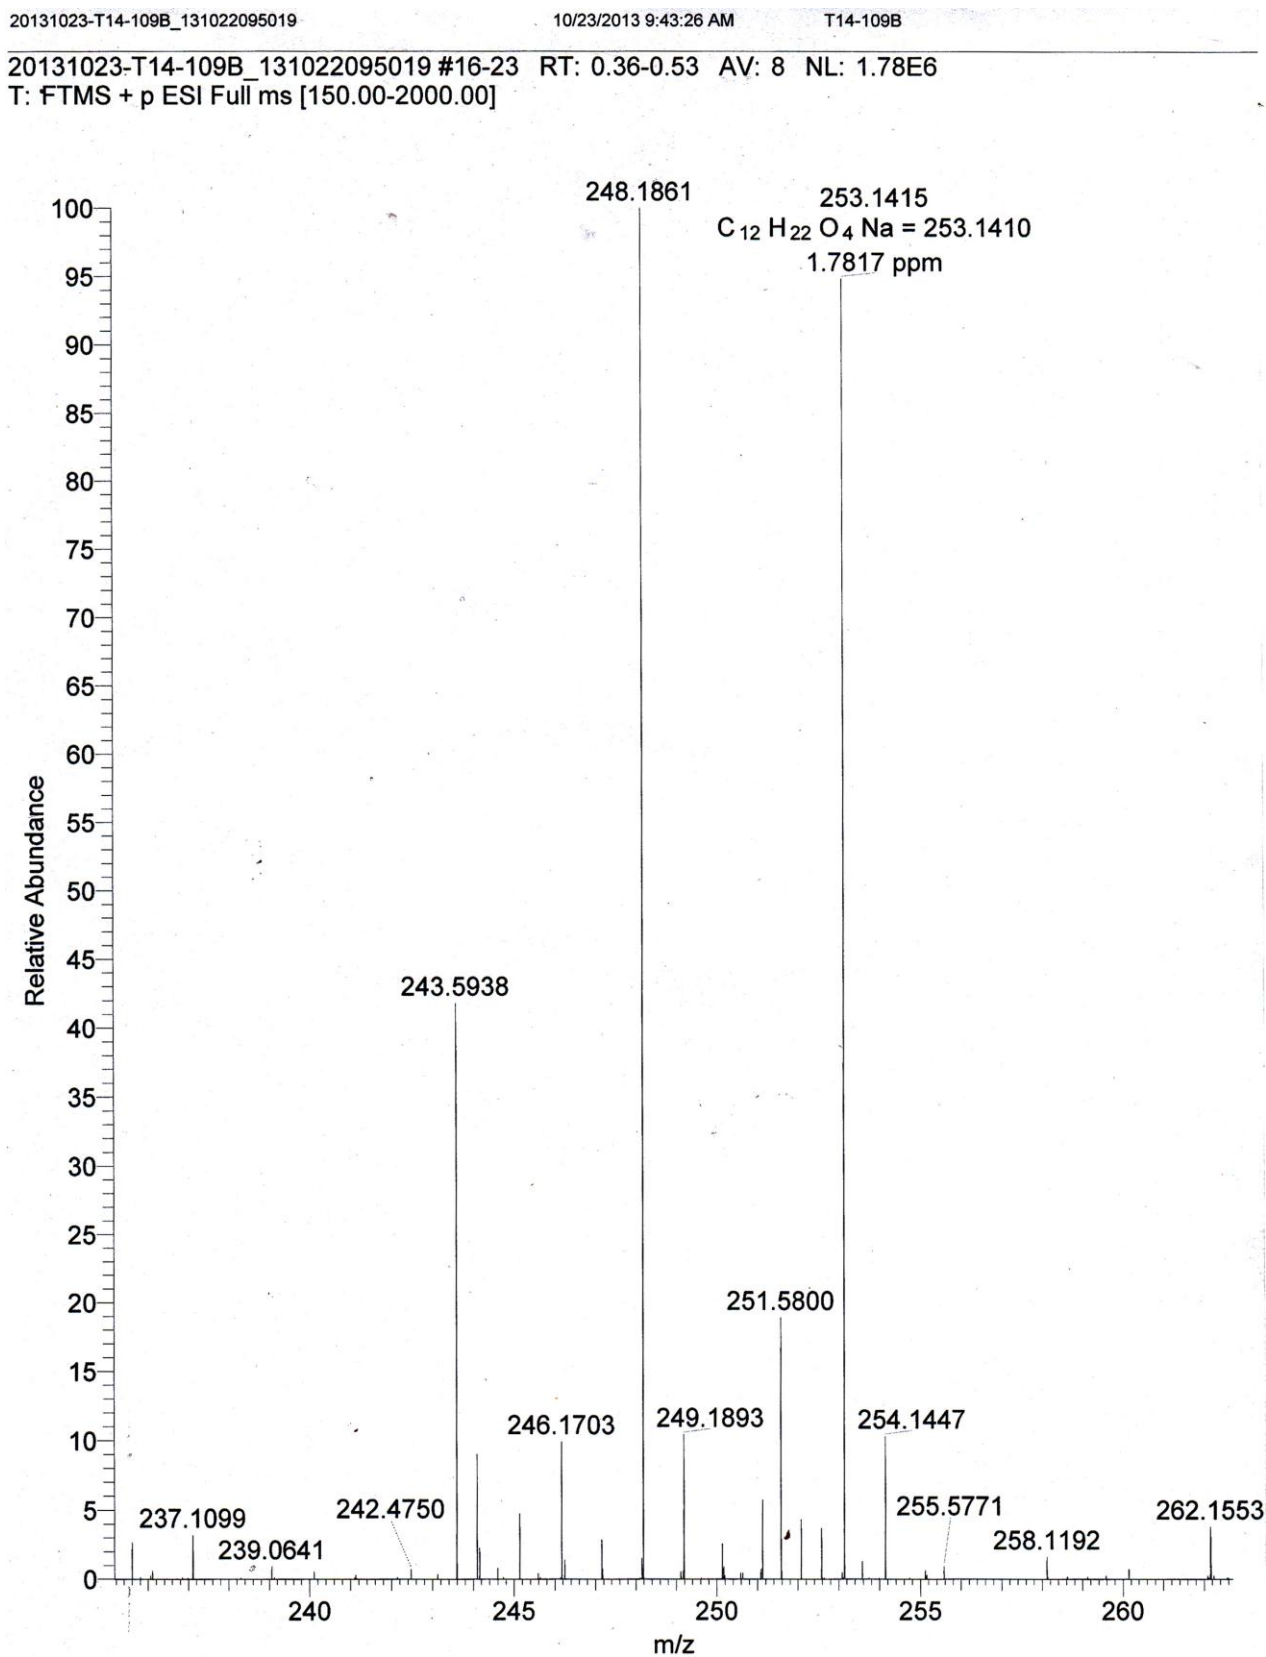

**Figure S18.**  $^1\text{H}$  NMR spectrum of compound **4a**.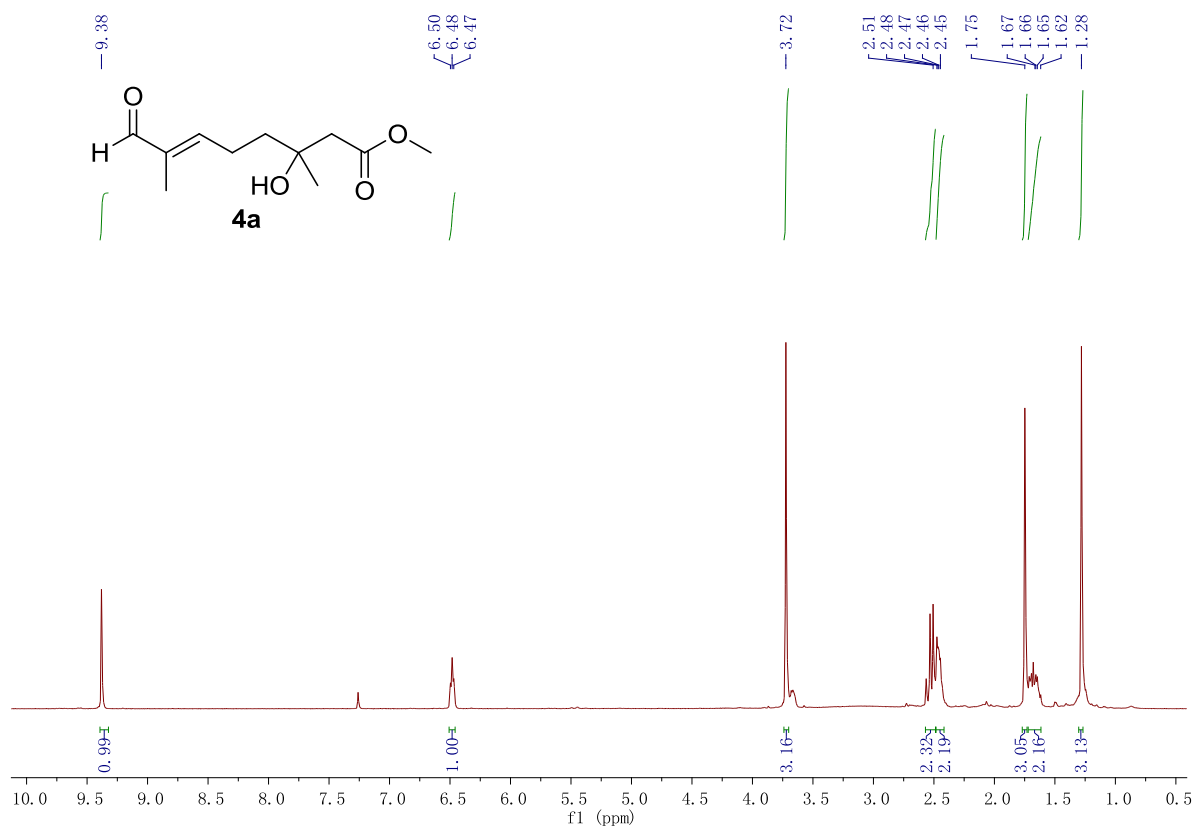**Figure S19.**  $^{13}\text{C}$  NMR spectrum of compound **4a**.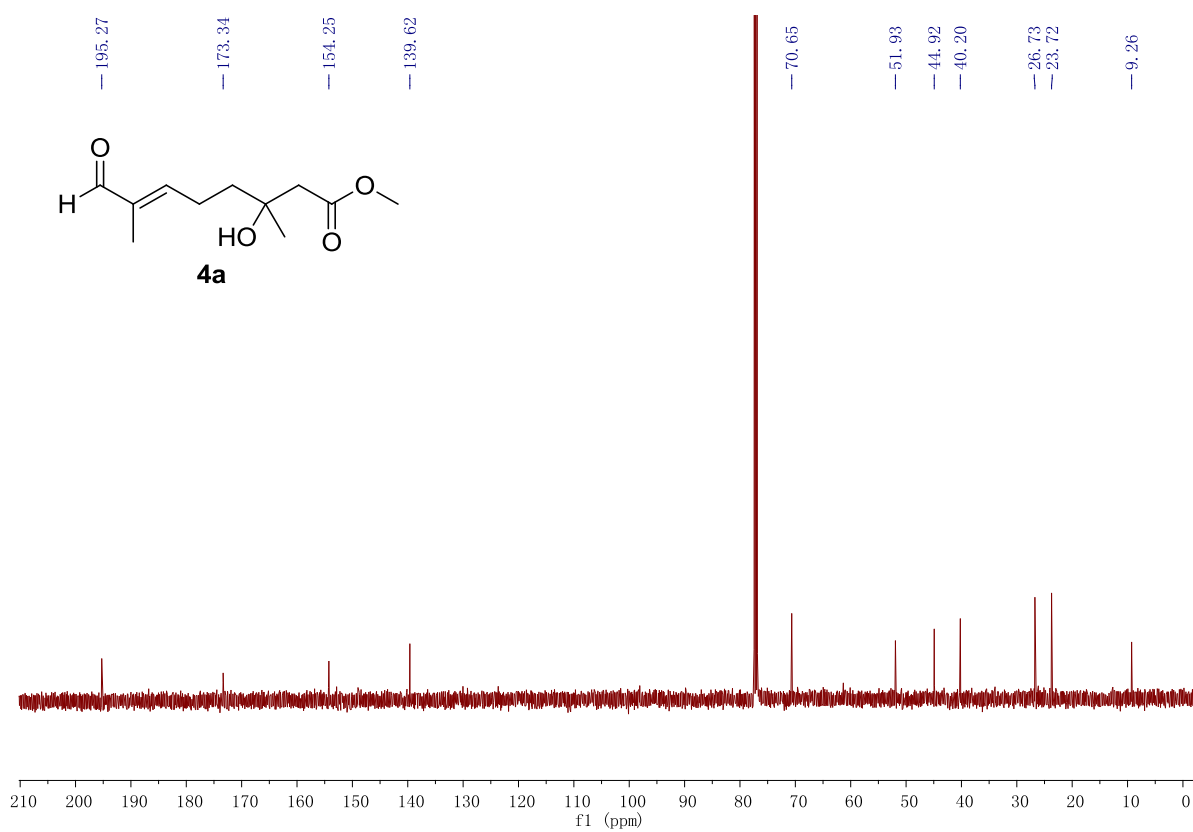

Figure S20. HRMS of compound 4a.

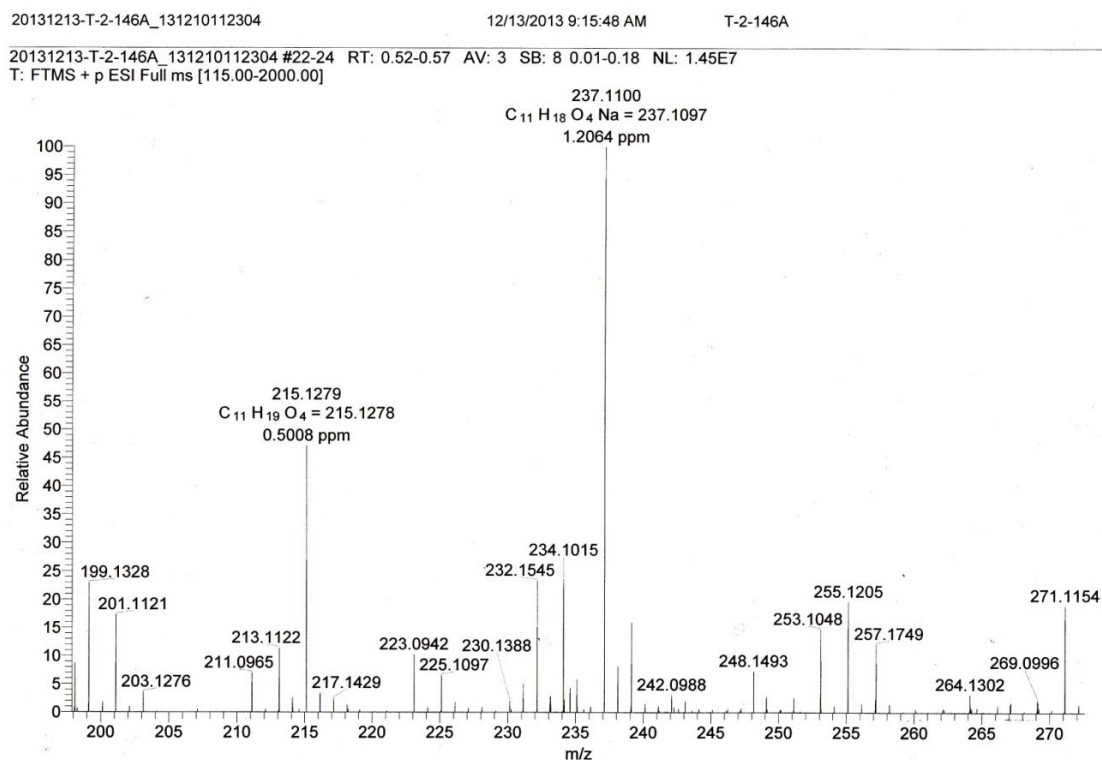Figure S21. <sup>1</sup>H NMR spectrum of compound 4b.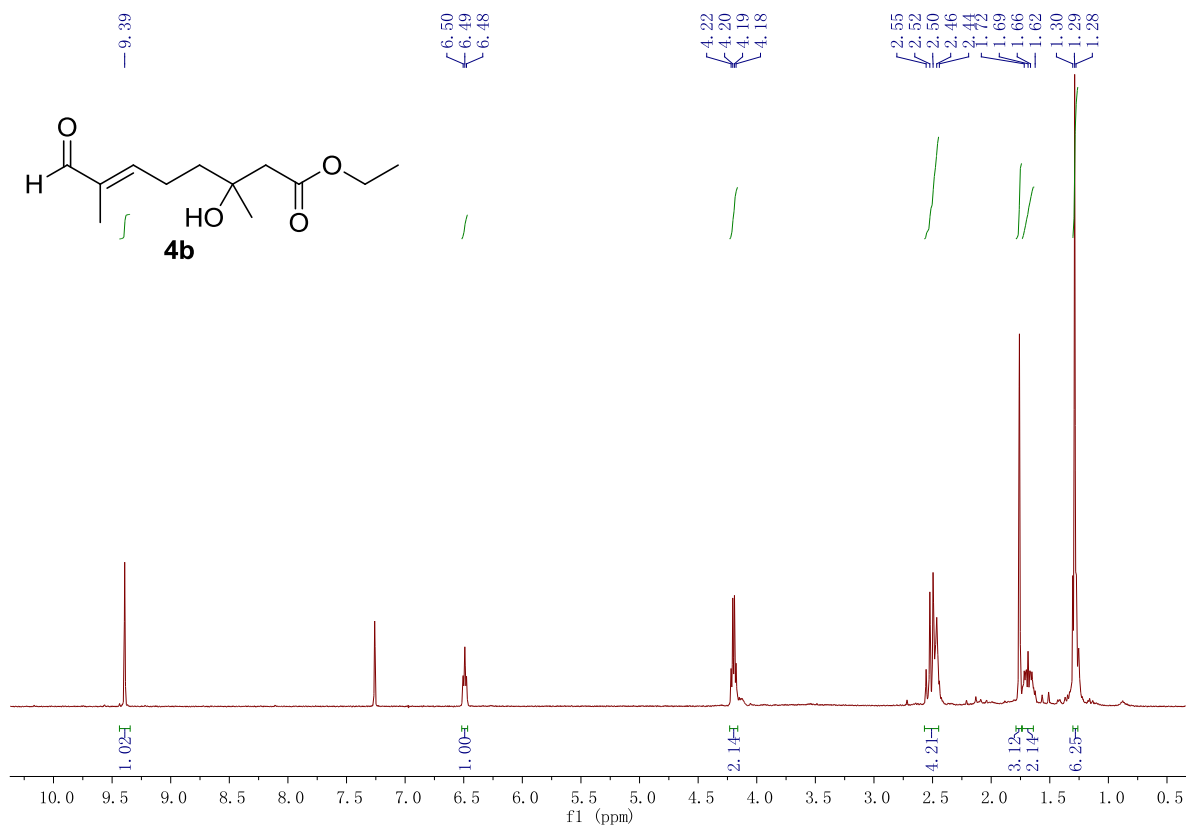

**Figure S22.**  $^{13}\text{C}$  NMR spectrum of compound **4b**.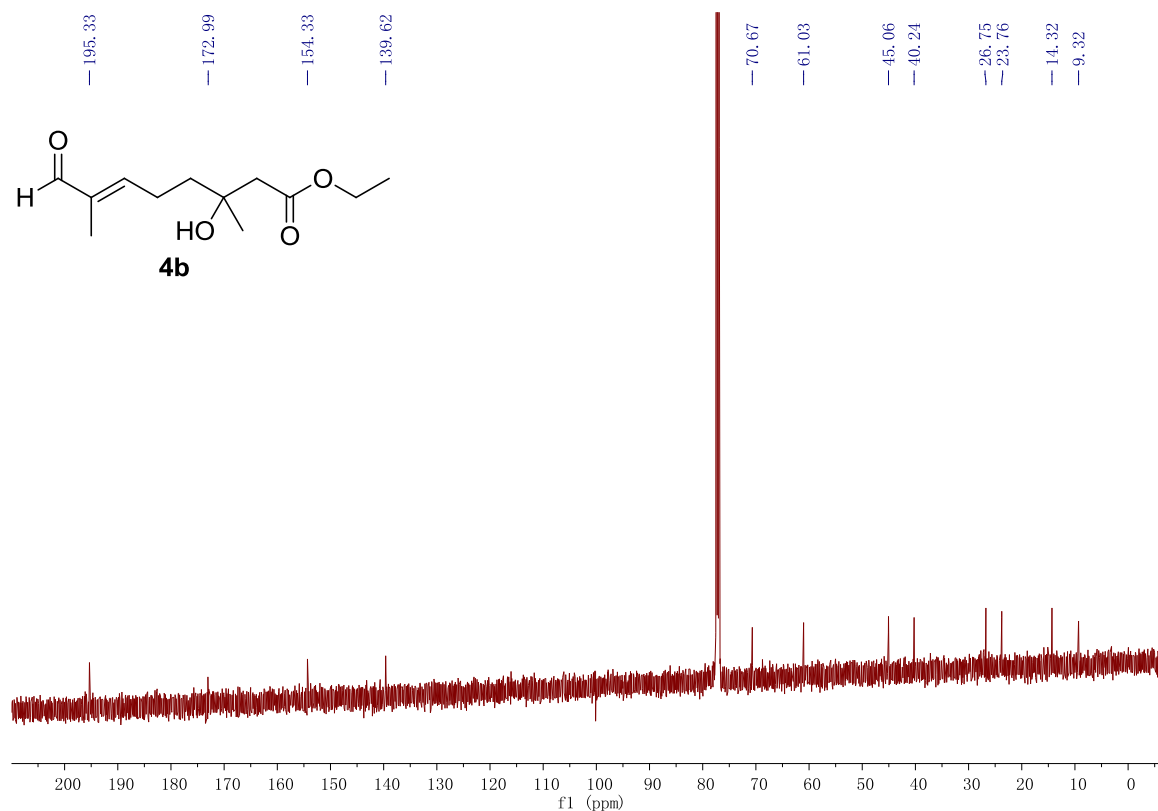**Figure S23.** HRMS of compound **4b**.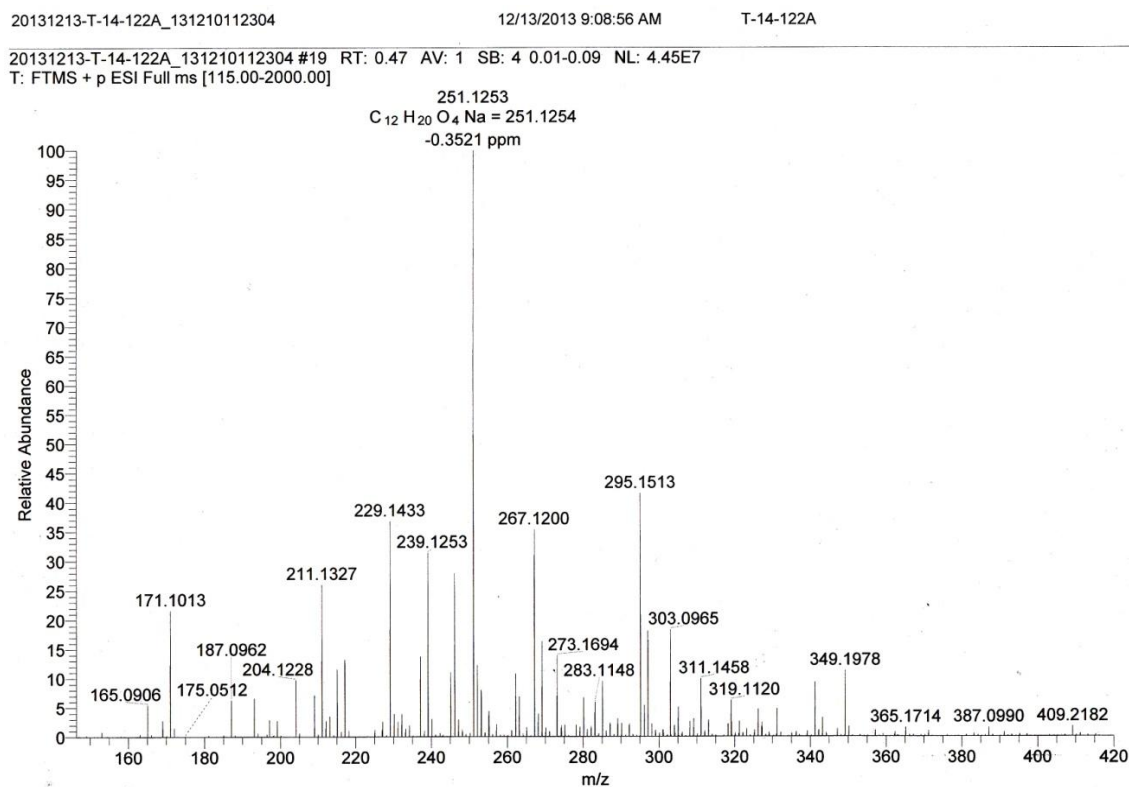

**Figure S24.**  $^1\text{H}$  NMR spectrum of compound **5**.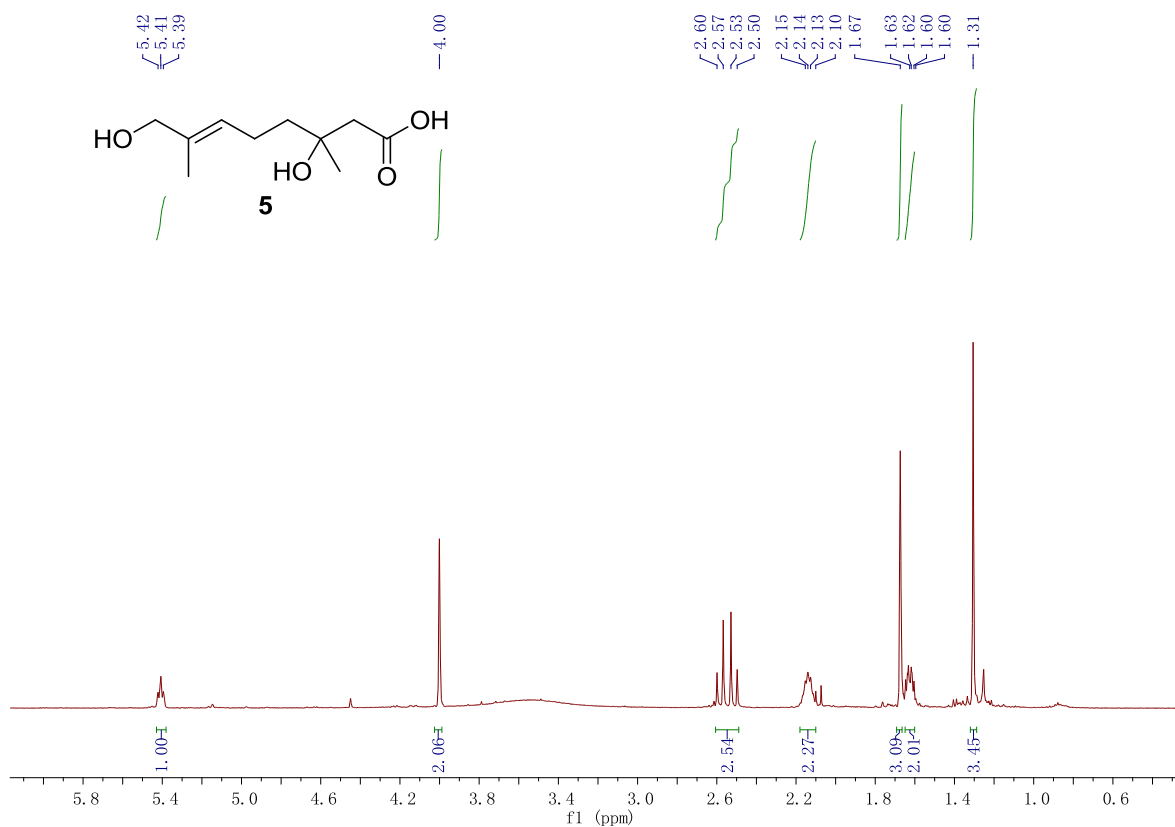**Figure S25.**  $^{13}\text{C}$  NMR spectrum of compound **5**.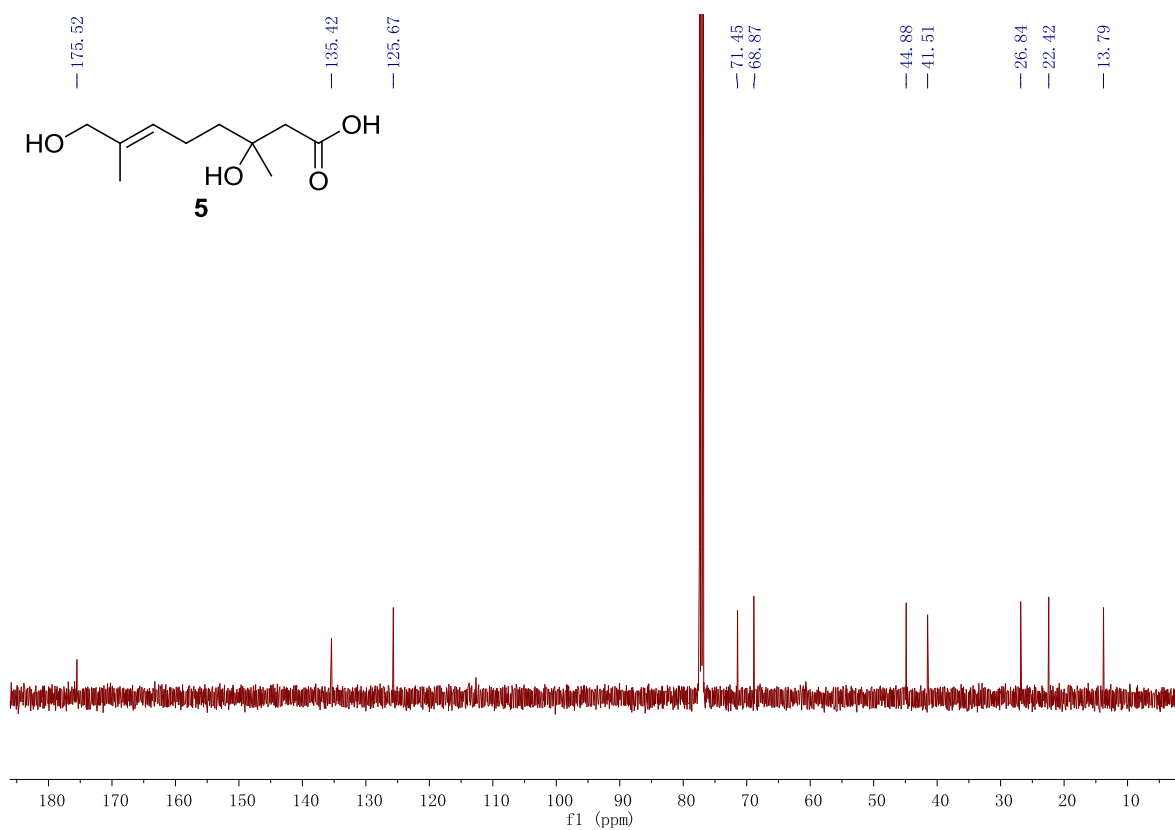

**Figure S26.** HRMS of compound **5**.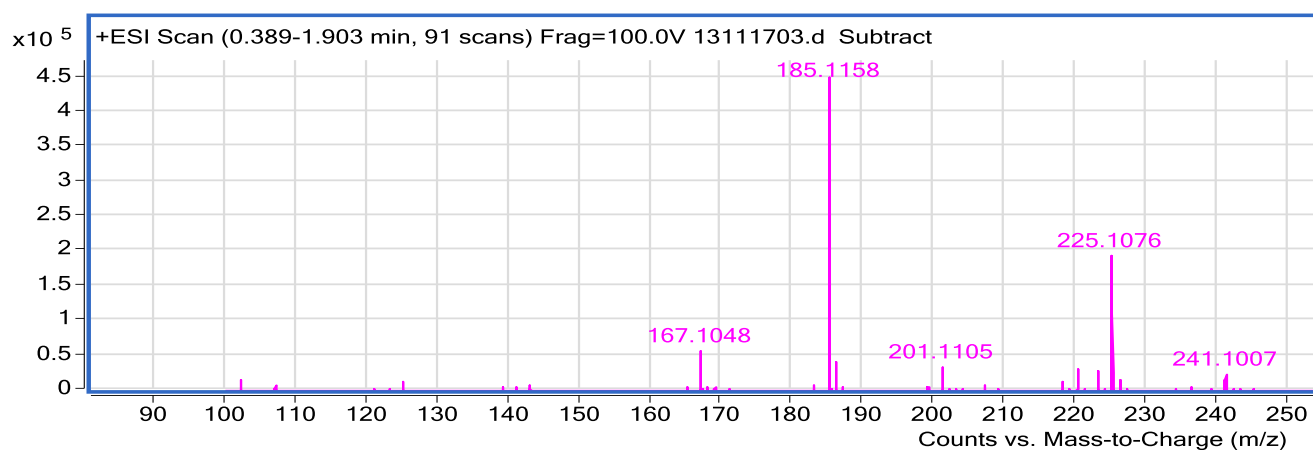**Figure S27.**  $^1\text{H}$  NMR spectrum of compound **6**.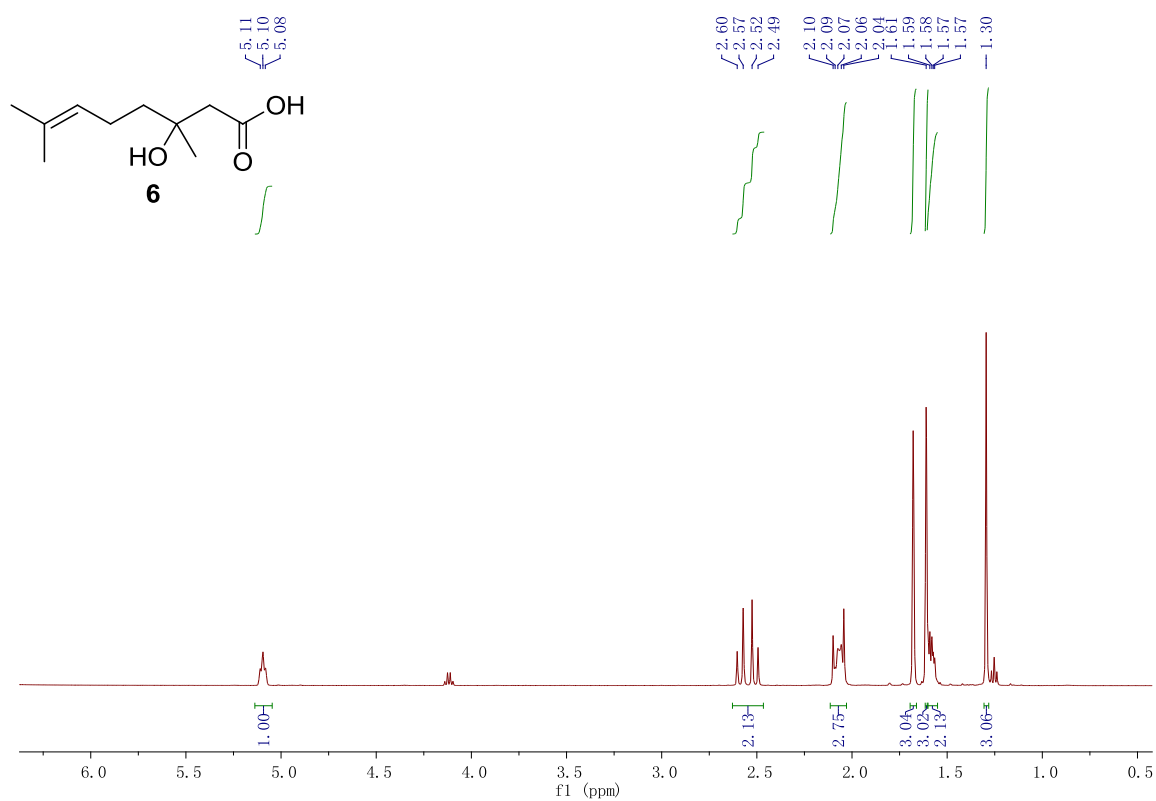



**Figure S28.**  $^{13}\text{C}$  NMR spectrum of compound **6**.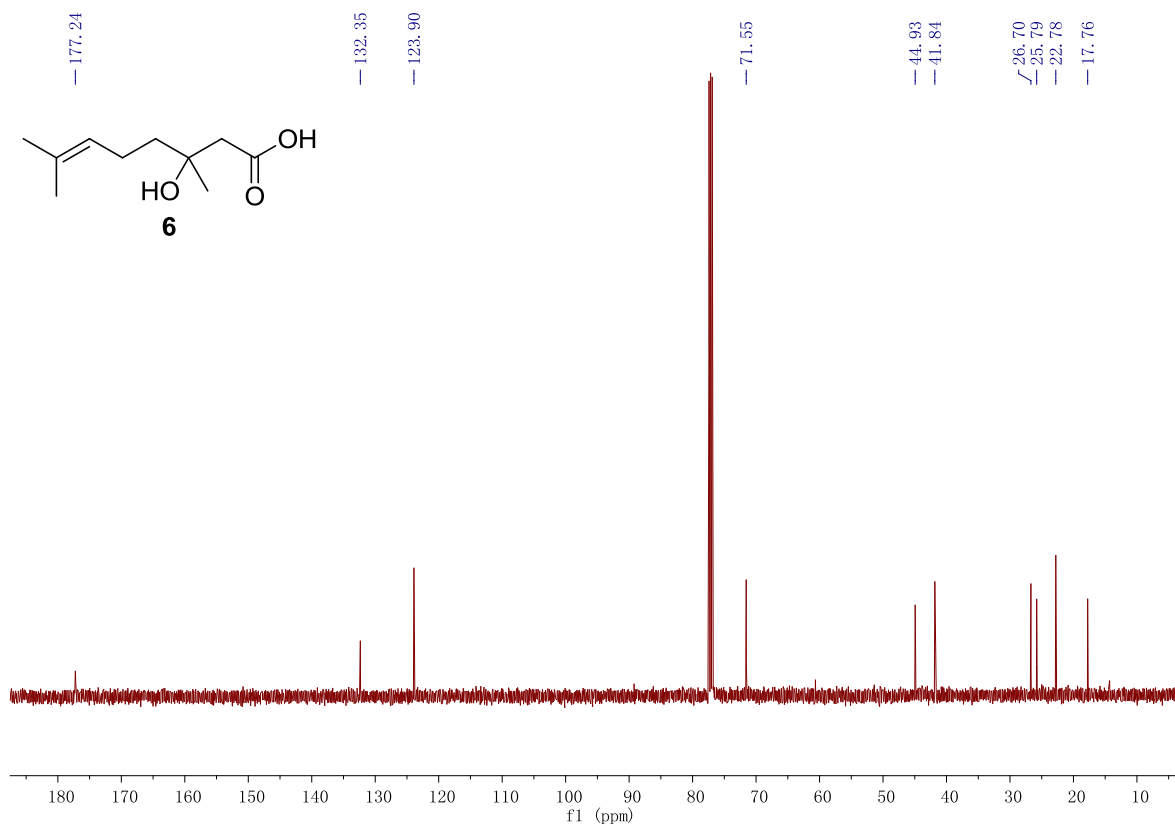**Figure S29.** HRMS of compound **6**.

D:\MS-DATA\20131213-T-3-72\_131210112304

12/13/2013 9:13:49 AM

T-3-72

20131213-T-3-72\_131210112304 #29-30 RT: 0.67-0.70 AV: 2 NL: 3.71E7

T: FTMS + p ESI Full ms [115.00-2000.00]

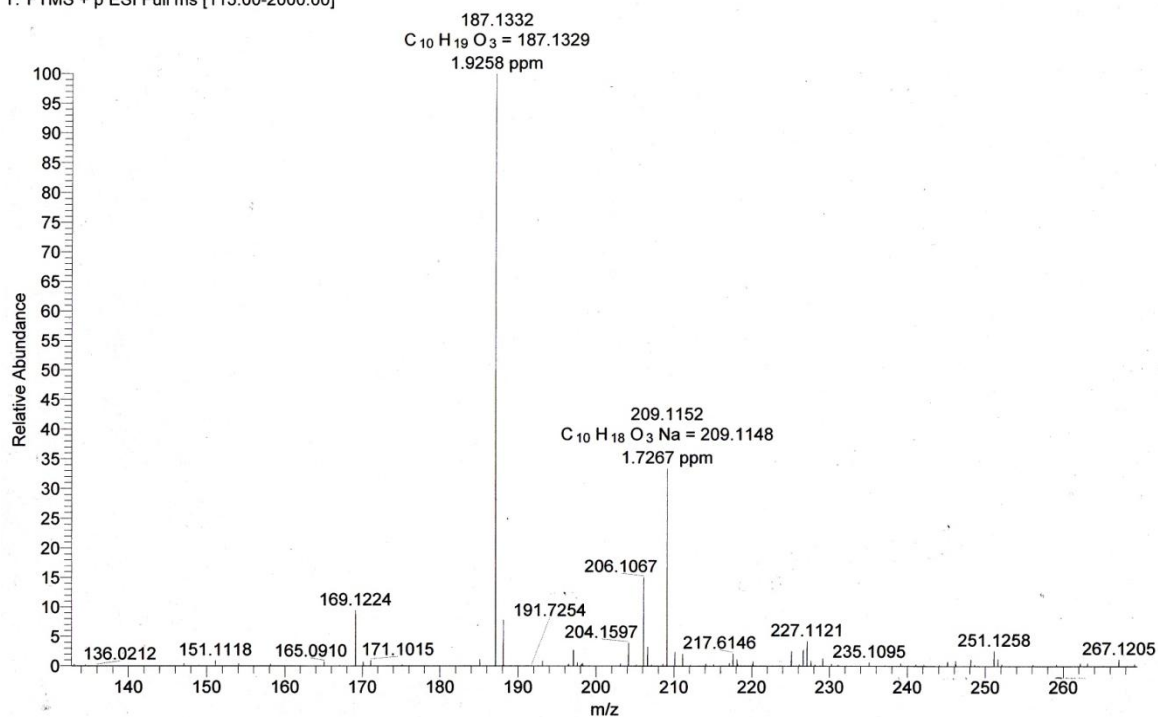

**Figure S30.**  $^1\text{H}$  NMR spectrum of compound 7.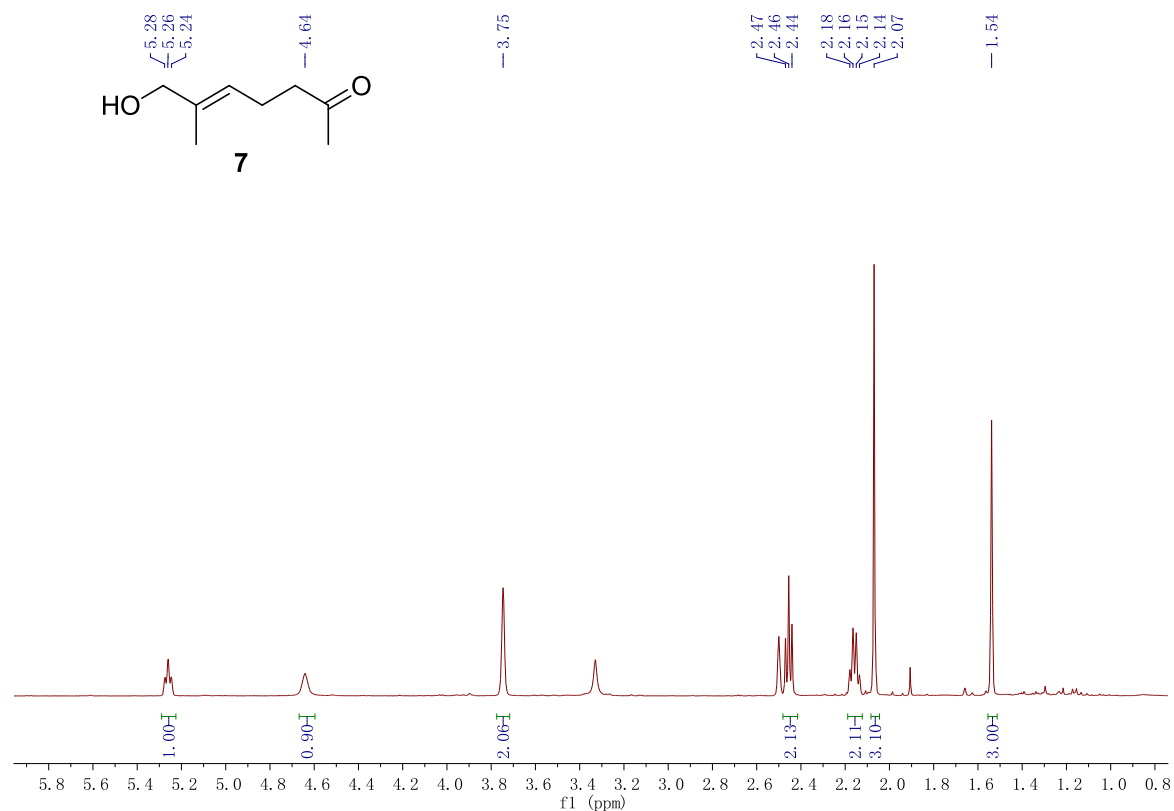**Figure S31.**  $^{13}\text{C}$  NMR spectrum of compound 7.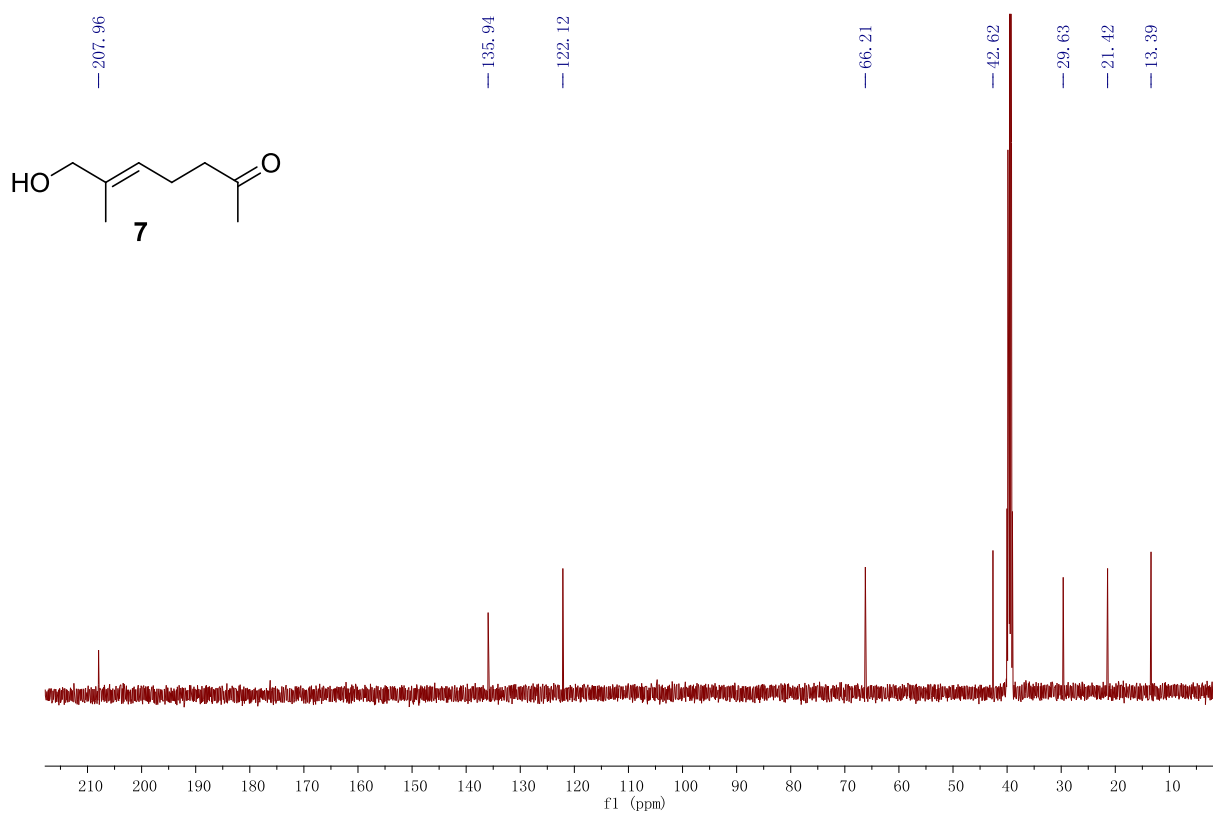

**Figure S32.**  $^1\text{H}$  NMR spectrum of compound **8a**.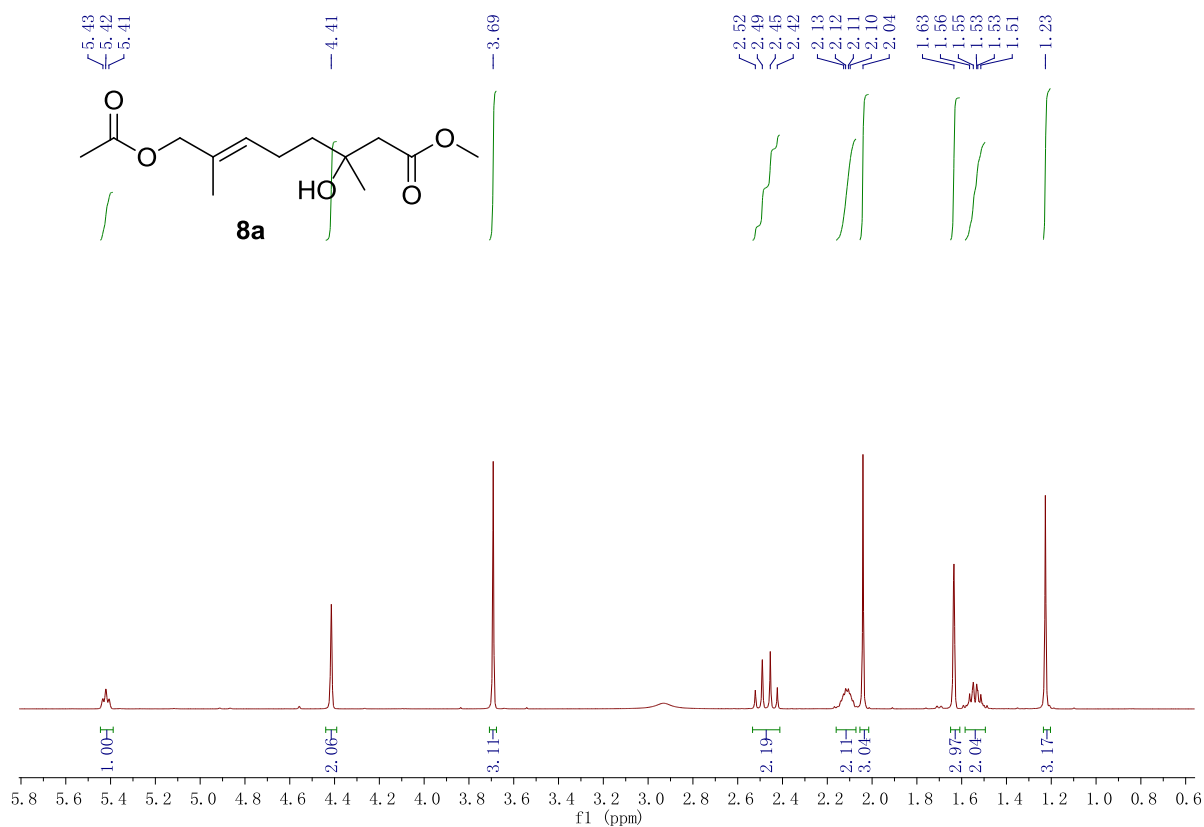**Figure S33.**  $^{13}\text{C}$  NMR spectrum of compound **8a**.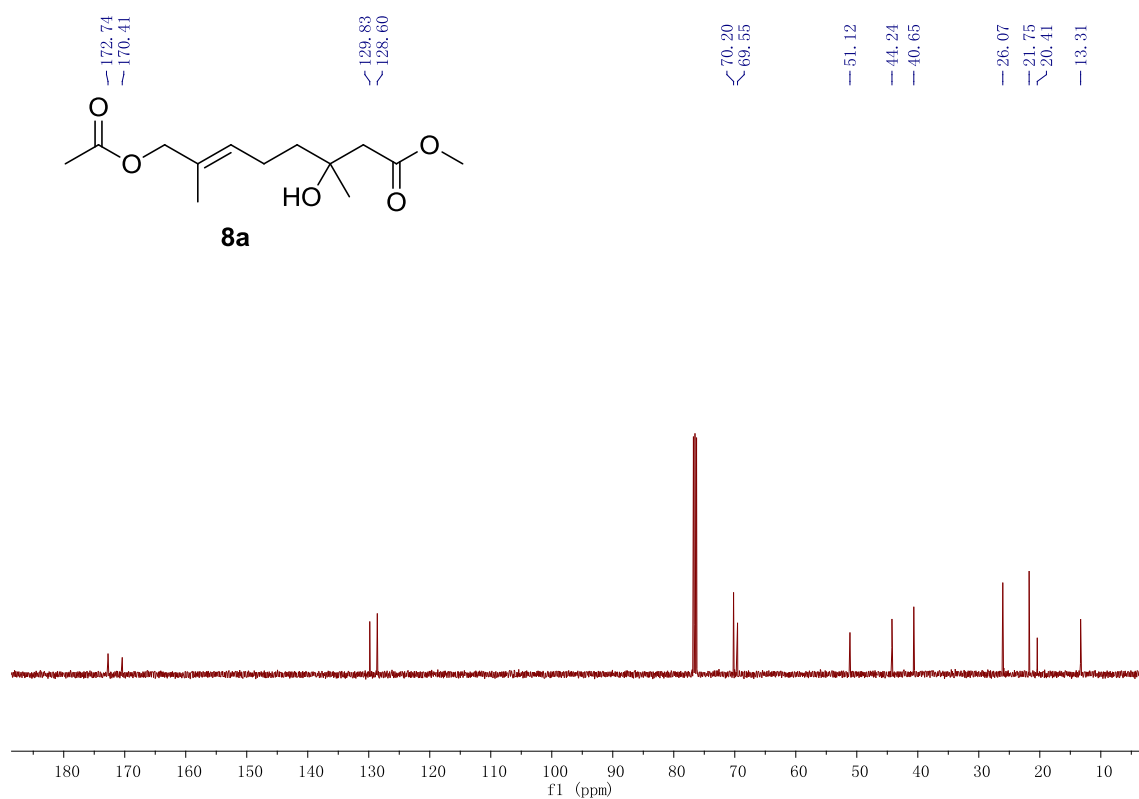

Figure S34. HRMS of compound 8a.

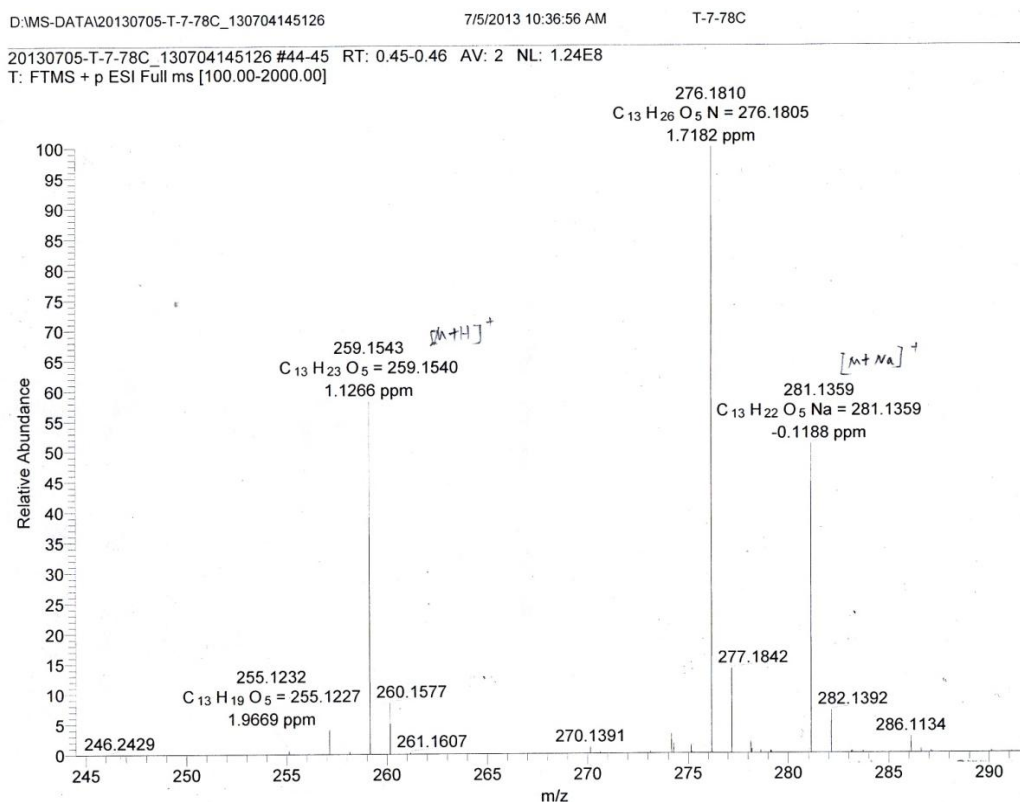Figure S35.  $^1H$  NMR spectrum of compound 8b.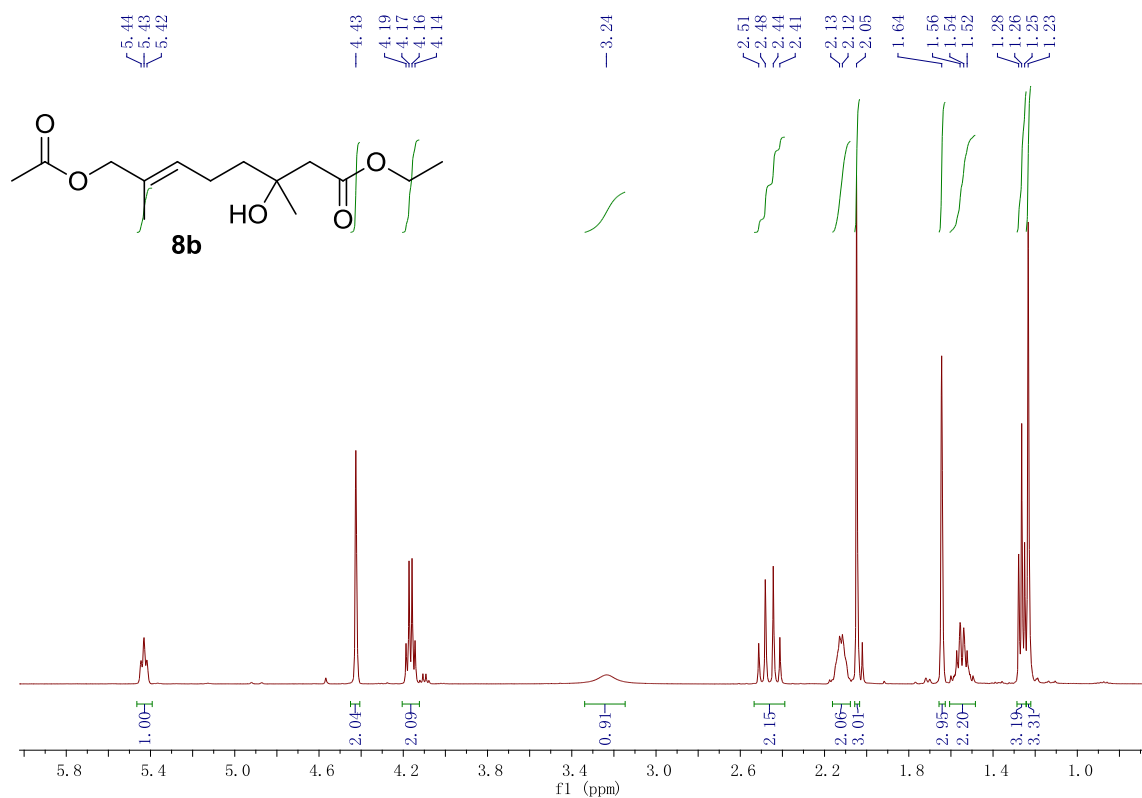

Figure S36.  $^{13}\text{C}$  NMR spectrum of compound **8b**.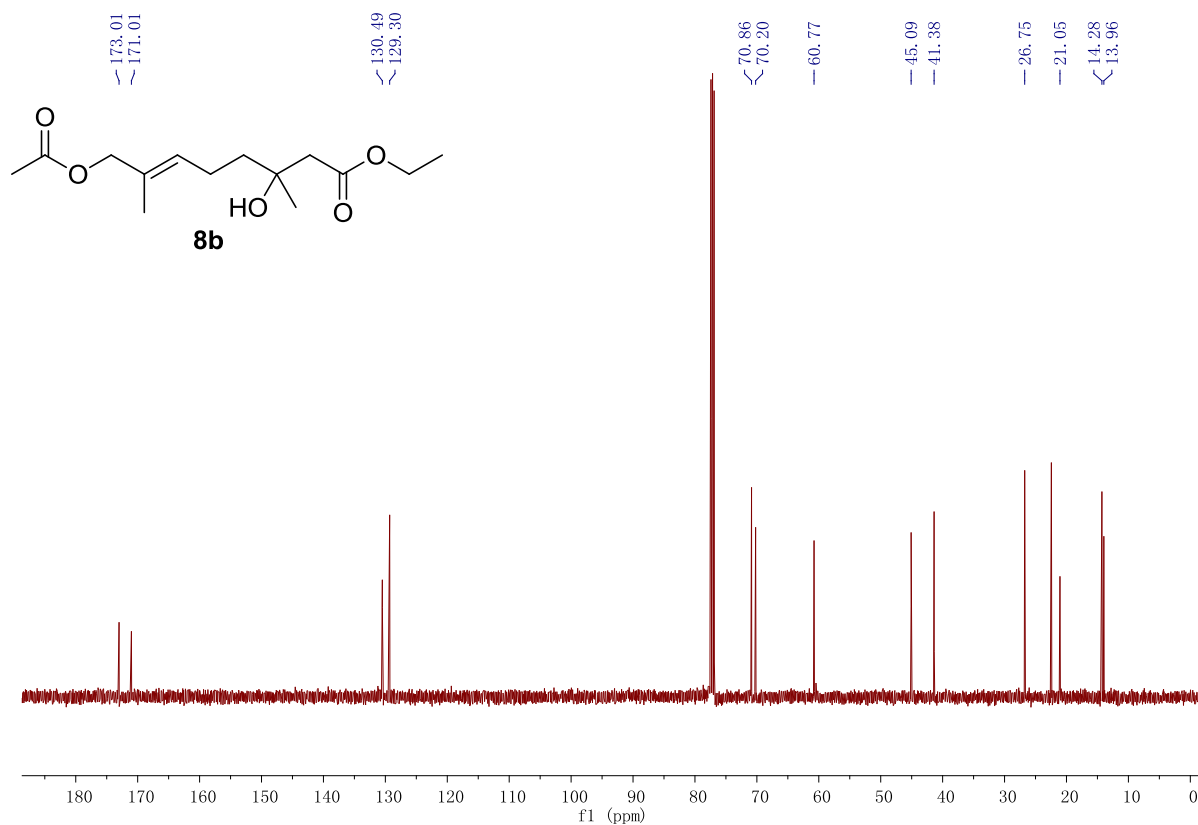Figure S37. HRMS of compound **8b**.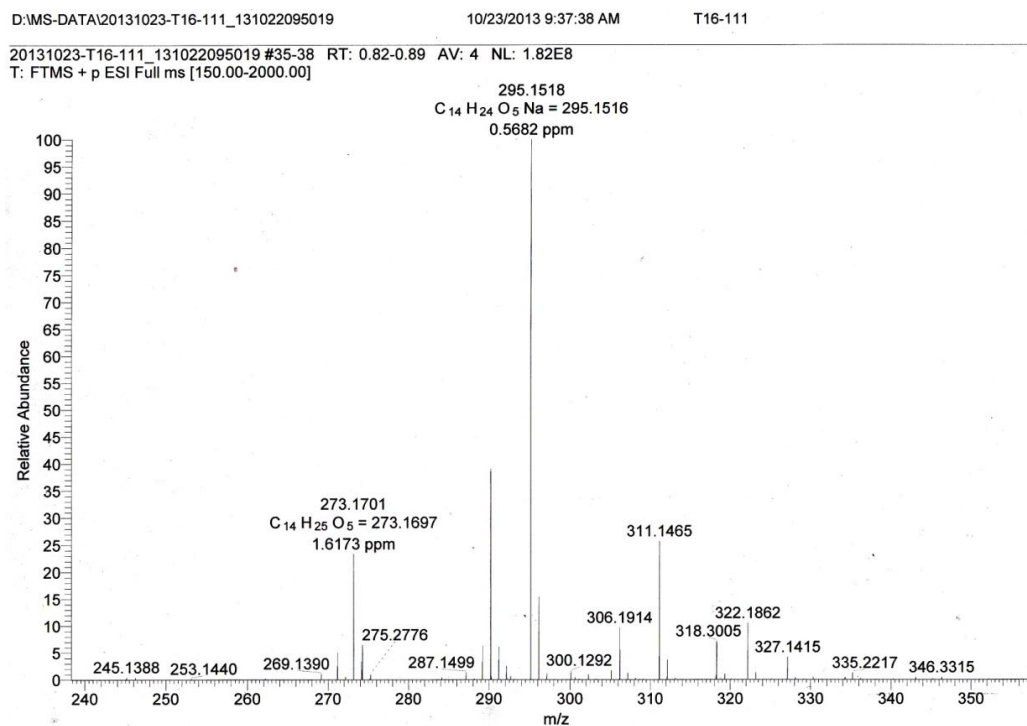

**Figure S38.**  $^1\text{H}$  NMR spectrum of compound **8c**.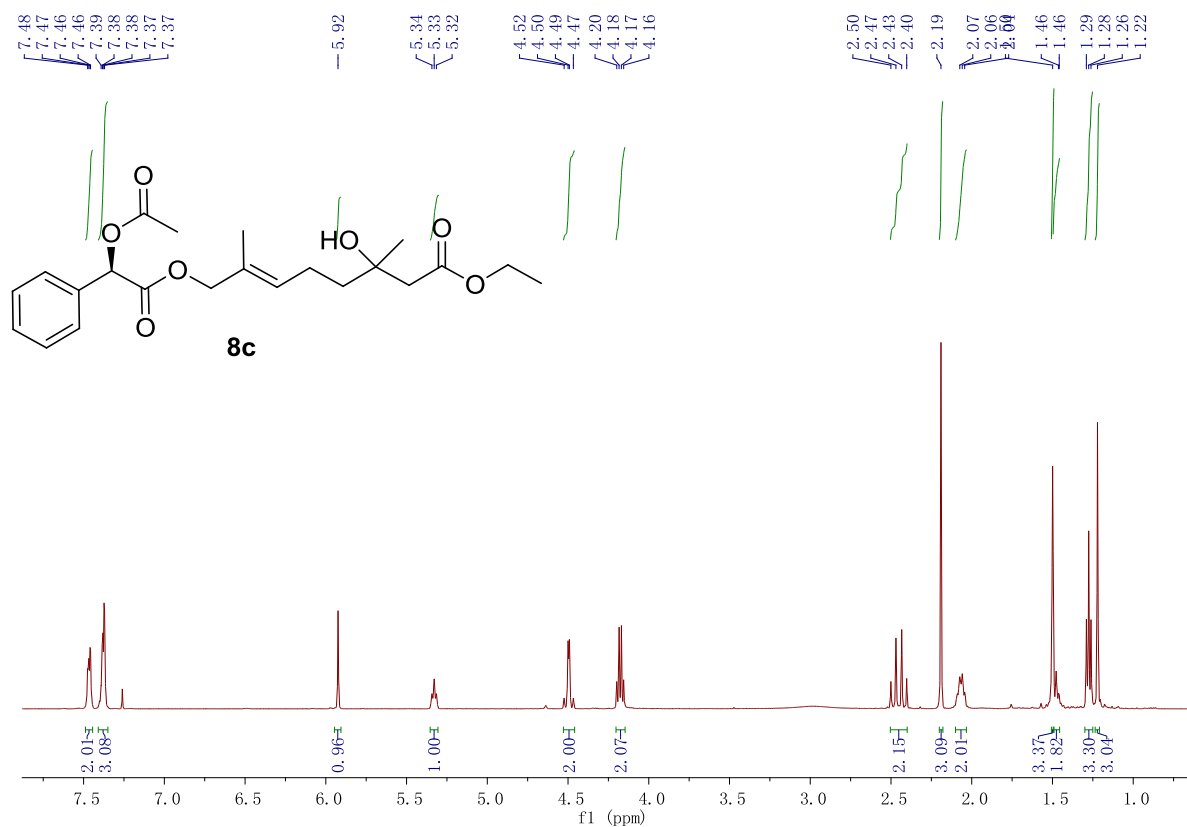**Figure S39.**  $^{13}\text{C}$  NMR spectrum of compound **8c**.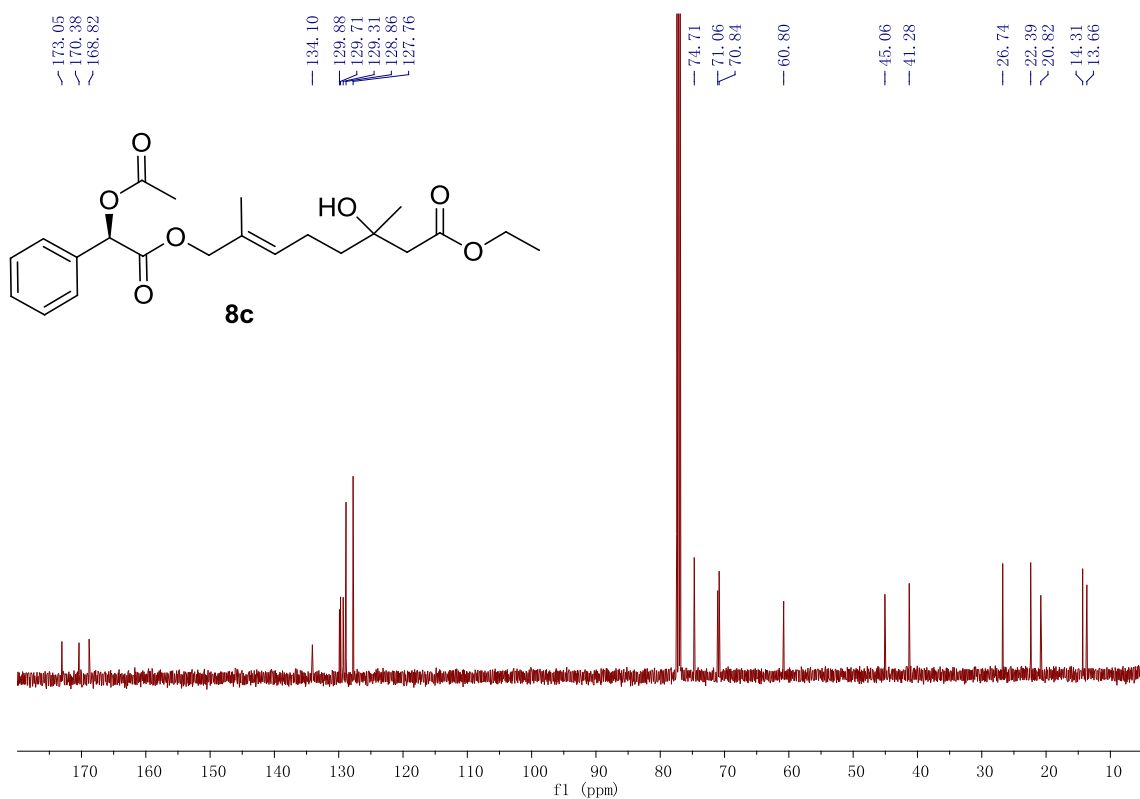

Figure S40. HRMS of compound 8c.

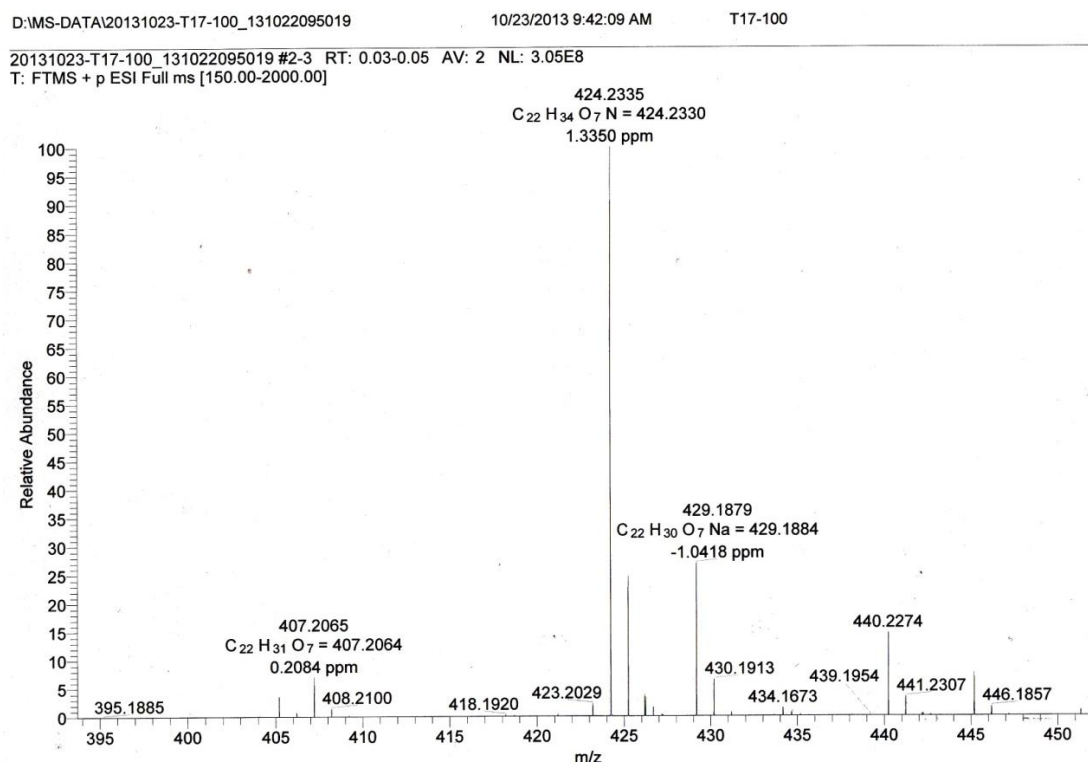Figure S41.  $^1H$  NMR spectrum of compound 9a.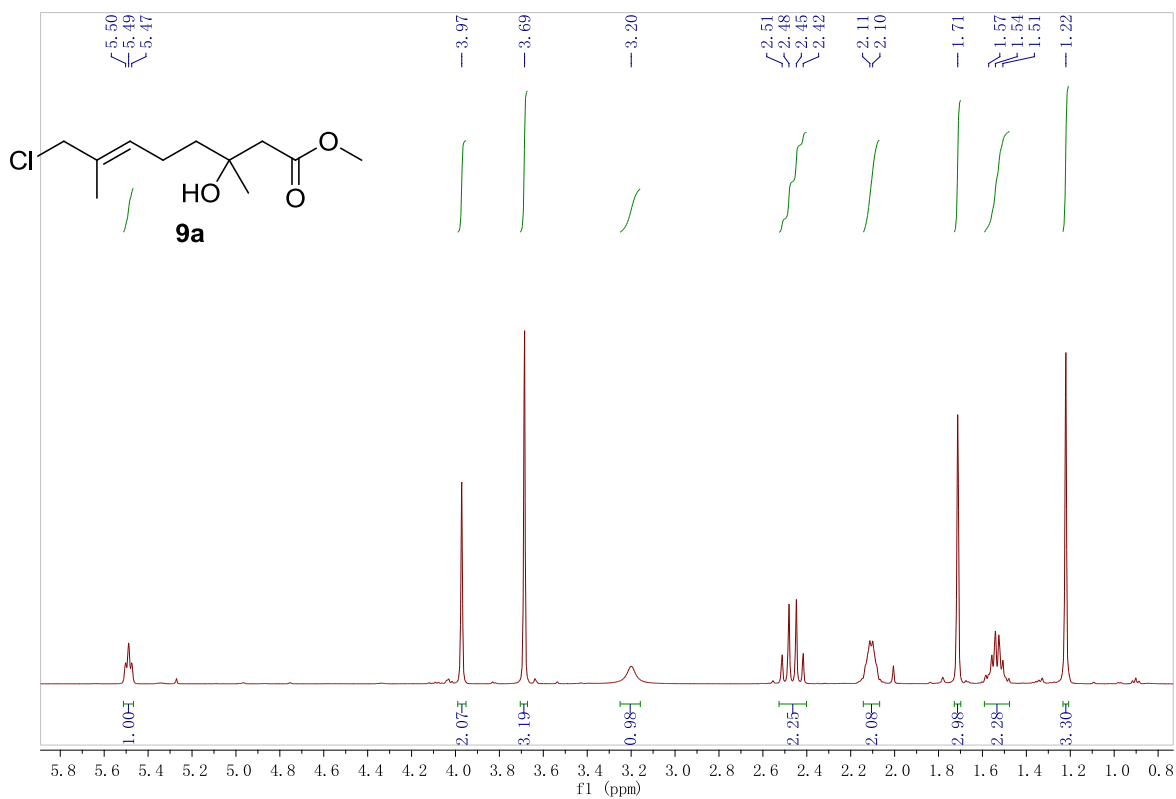

**Figure S42.**  $^{13}\text{C}$  NMR spectrum of compound **9a**.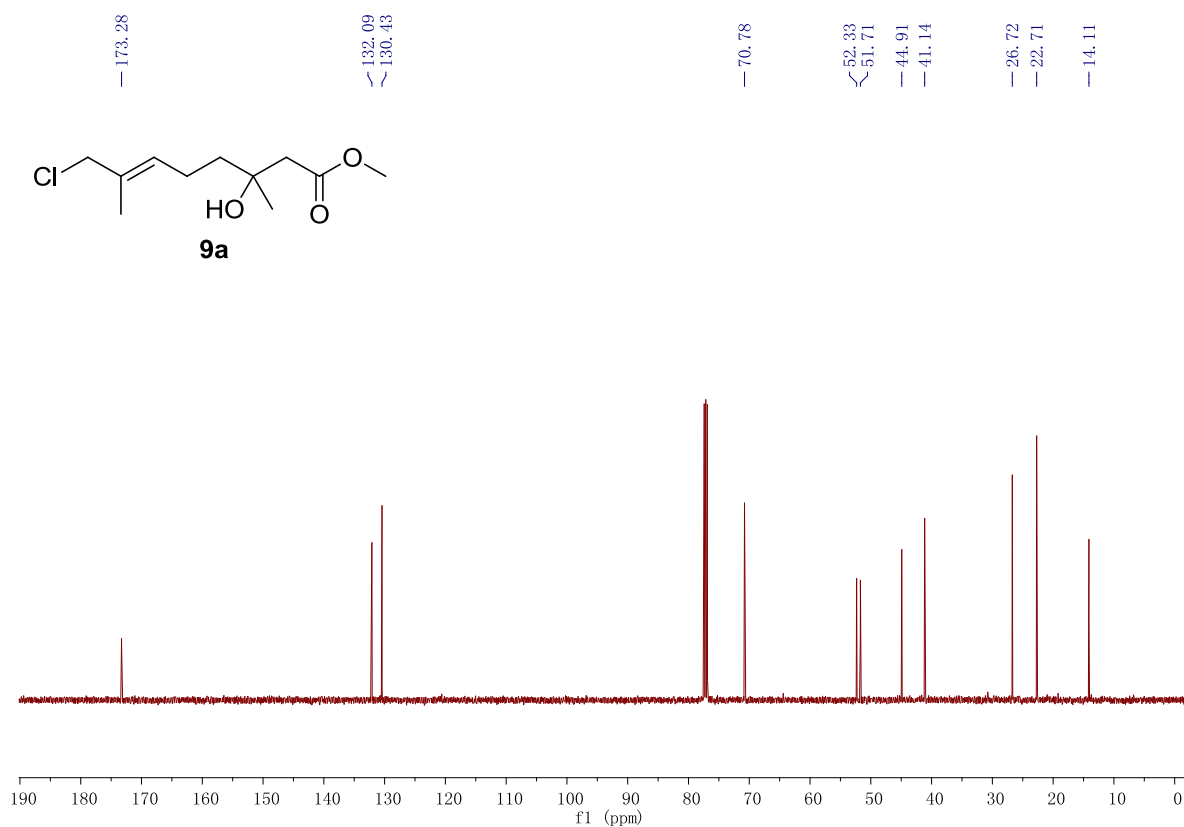**Figure S43.** HRMS of compound **9a**.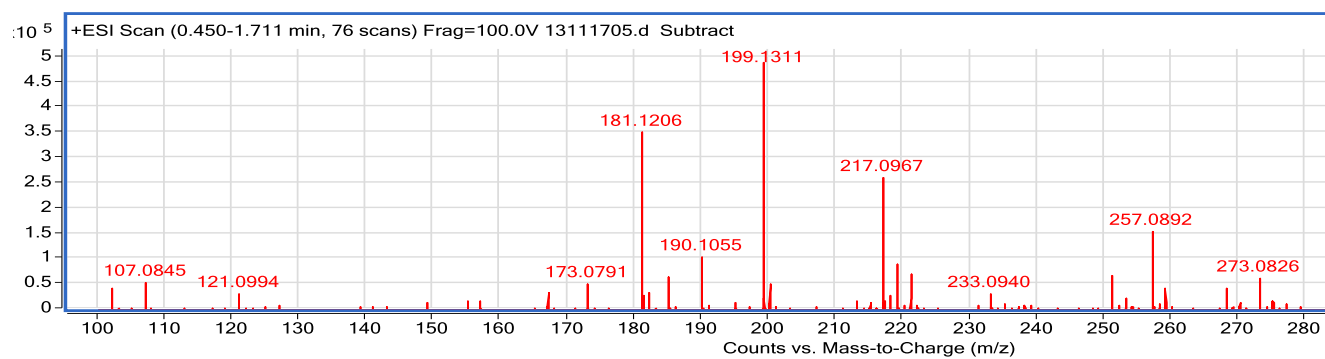



**Figure S44.**  $^1\text{H}$  NMR spectrum of compound **9b**.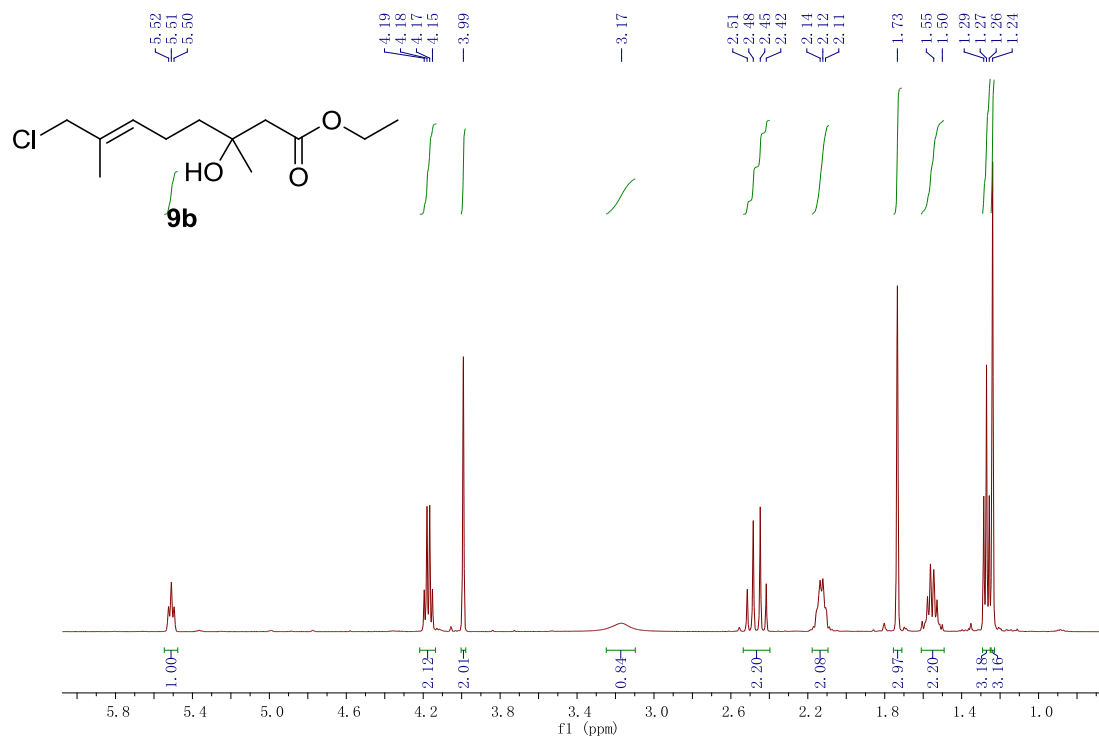**Figure S45.**  $^{13}\text{C}$  NMR spectrum of compound **9b**.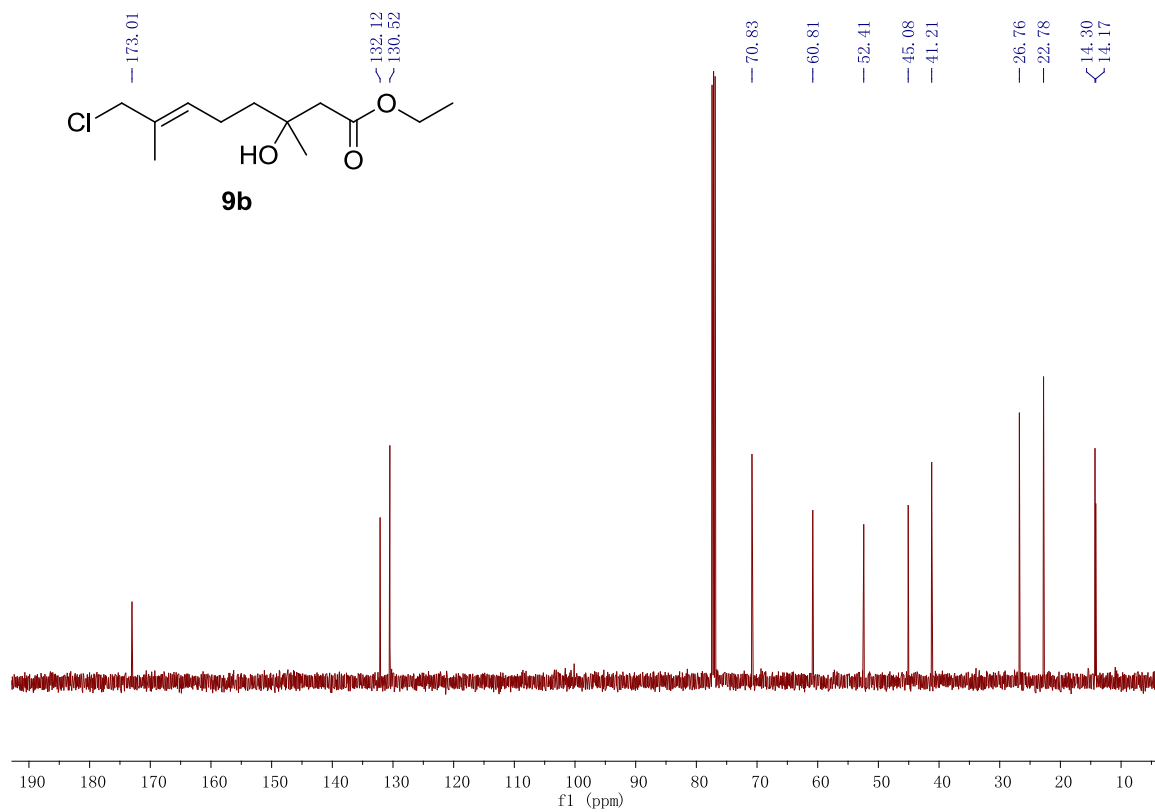

Figure S46. HRMS of compound 9b.

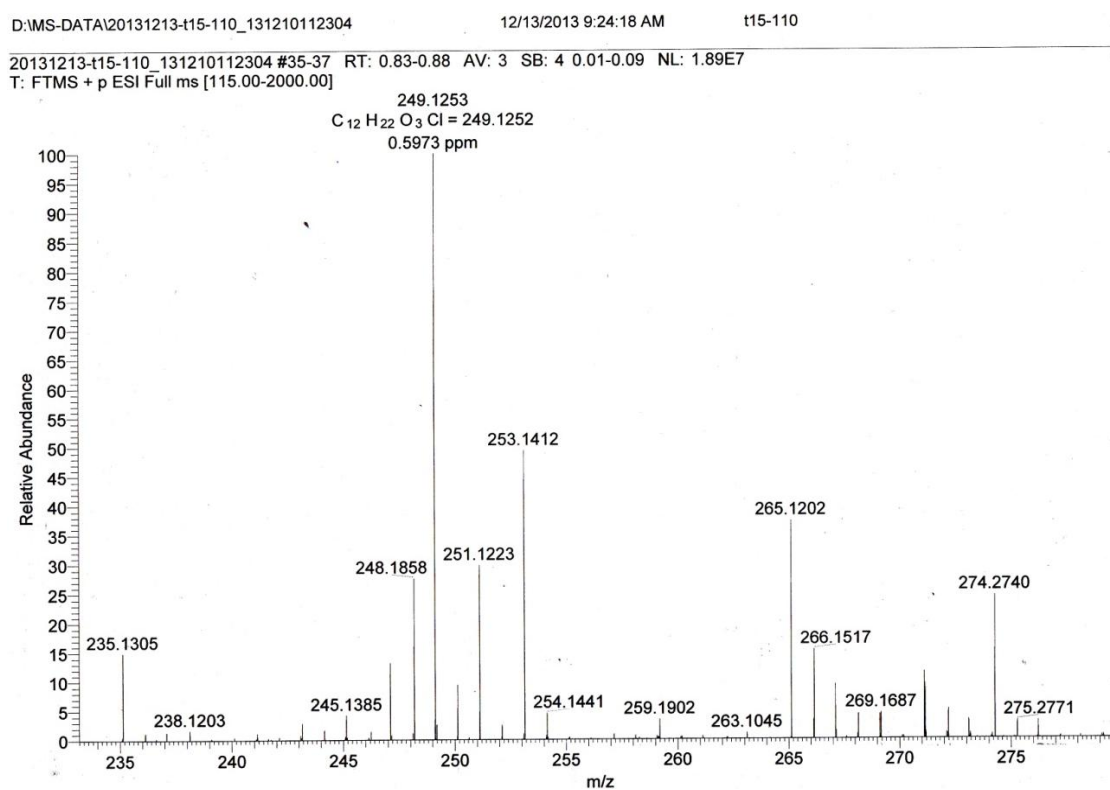Figure S47. <sup>1</sup>H NMR spectrum of compound 10.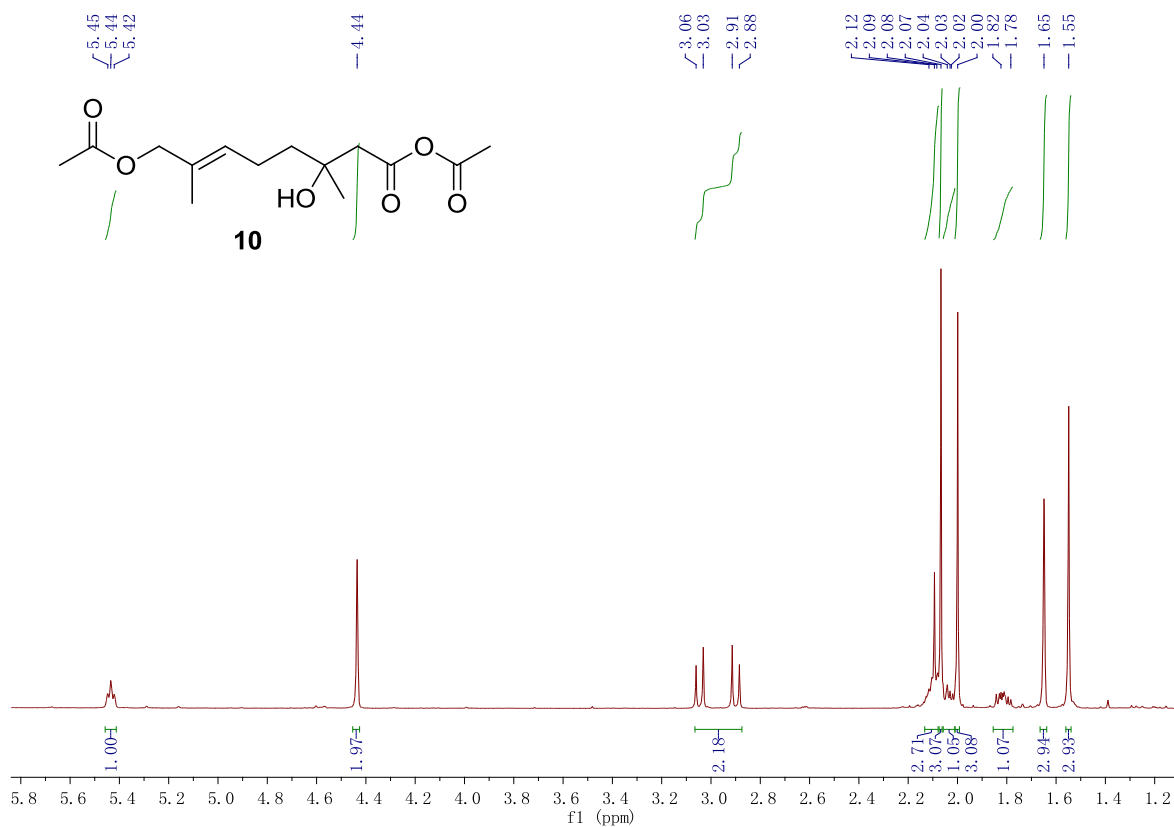

**Figure S48.**  $^{13}\text{C}$  NMR spectrum of compound **10**.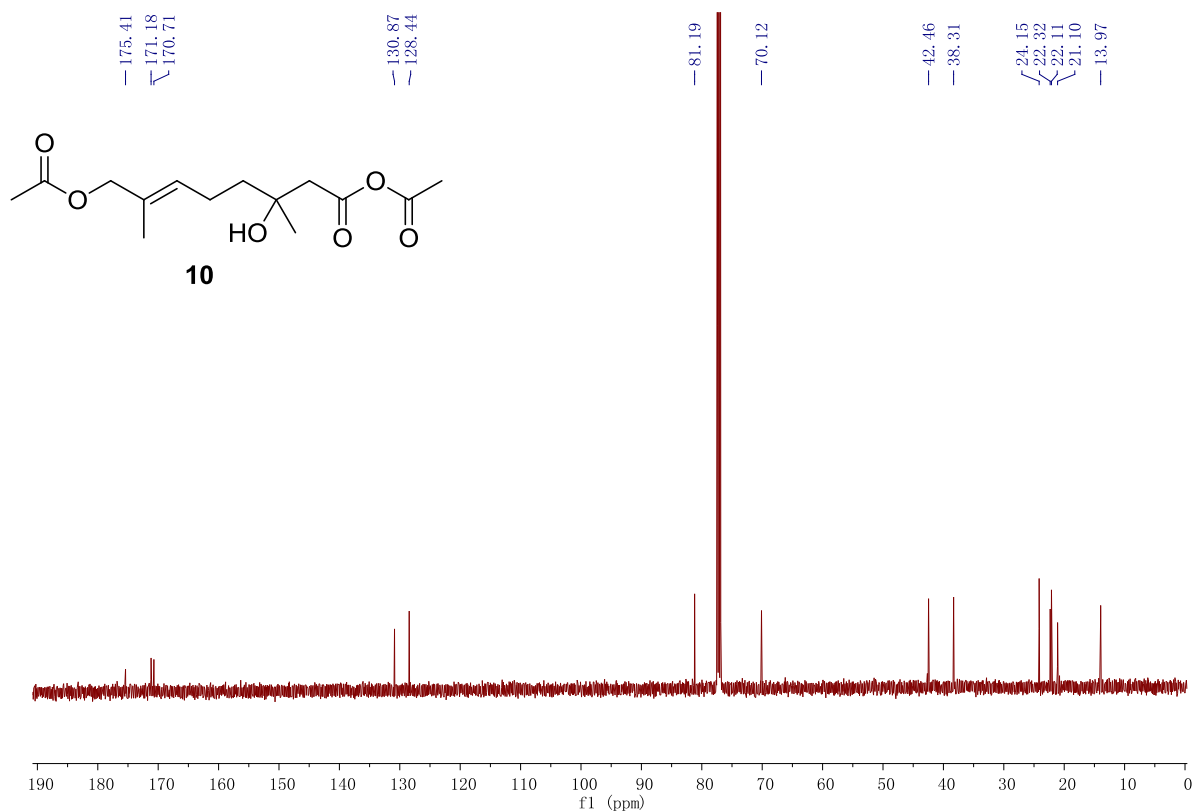**Figure S49.** HRMS of compound **10**.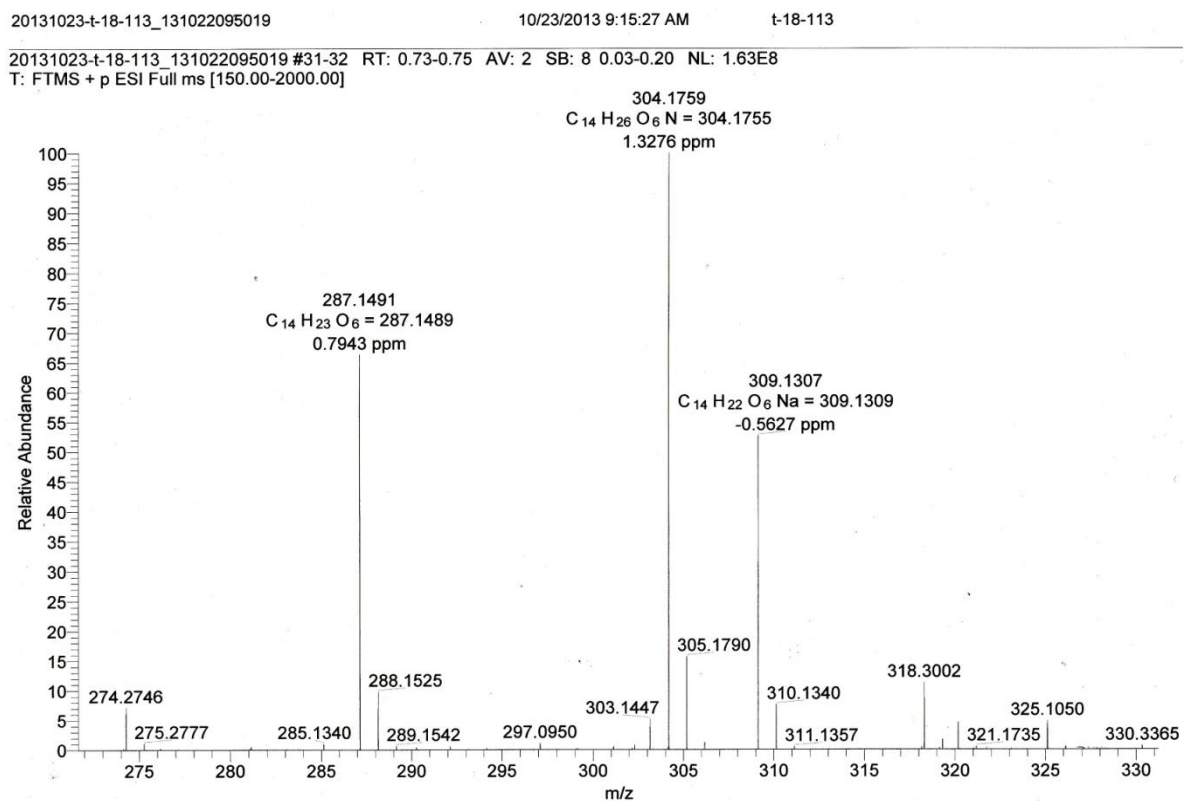

**Figure S50.**  $^1\text{H}$  NMR spectrum of compound **11**.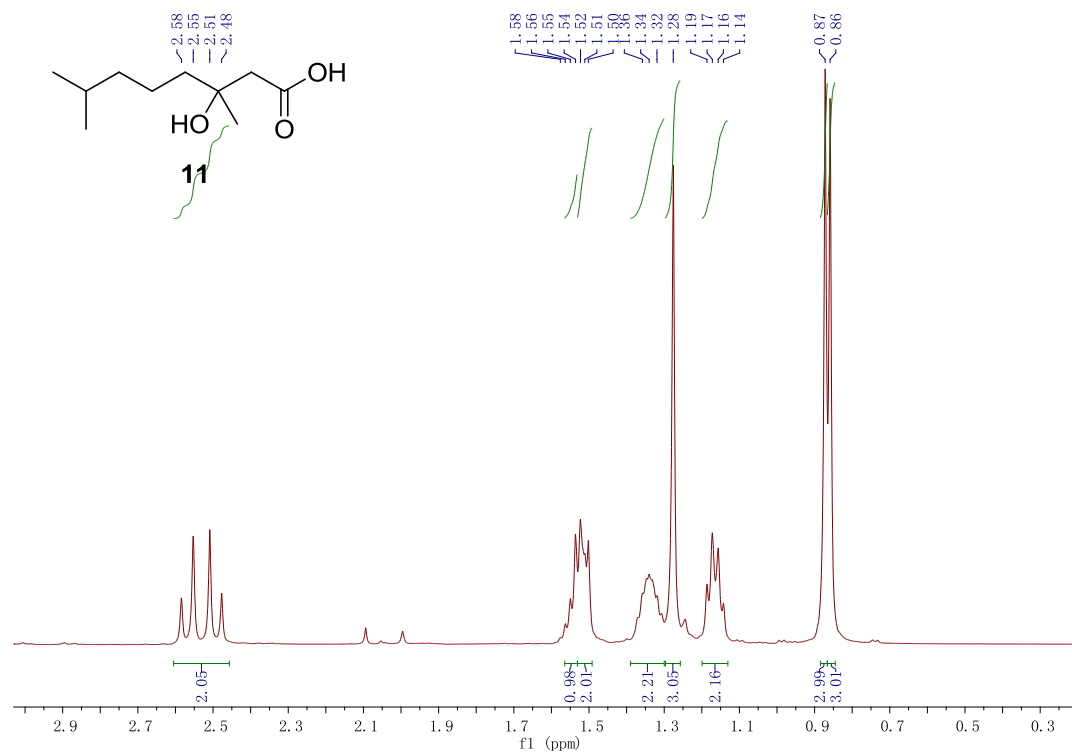**Figure S51.**  $^{13}\text{C}$  NMR spectrum of compound **11**.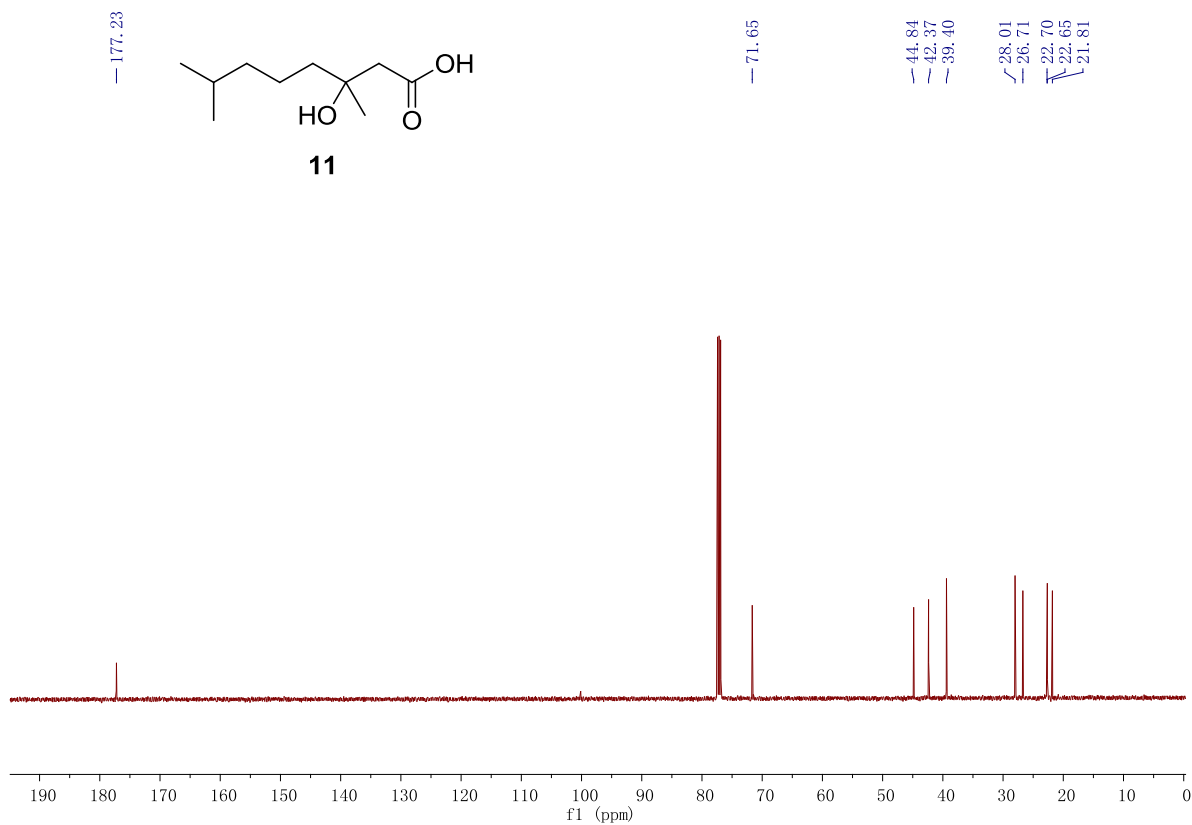

Figure S52. HRMS of compound 11.

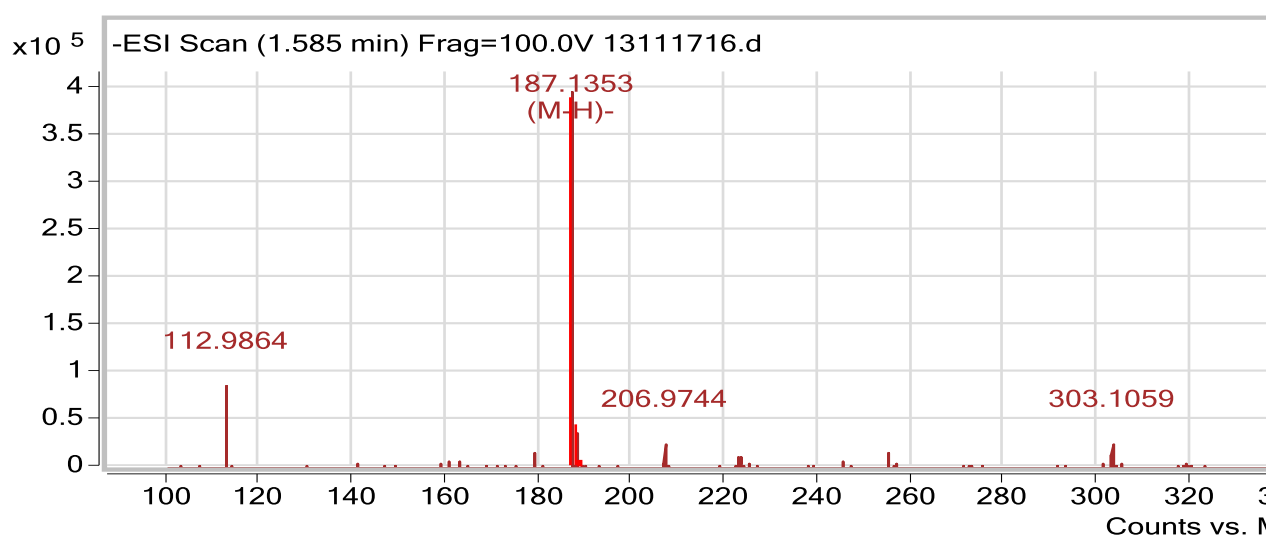Figure S53.  $^1\text{H}$  NMR spectrum of compound 12.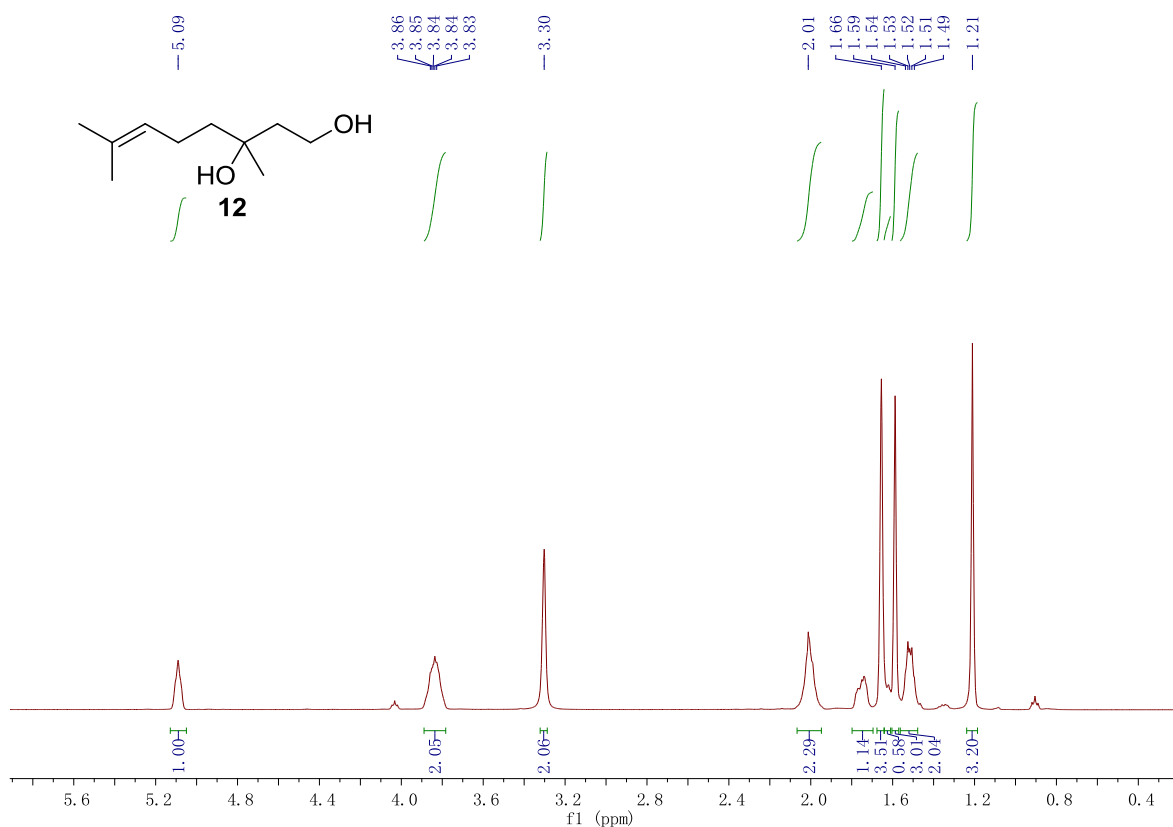

**Figure S54.**  $^{13}\text{C}$  NMR spectrum of compound **12**.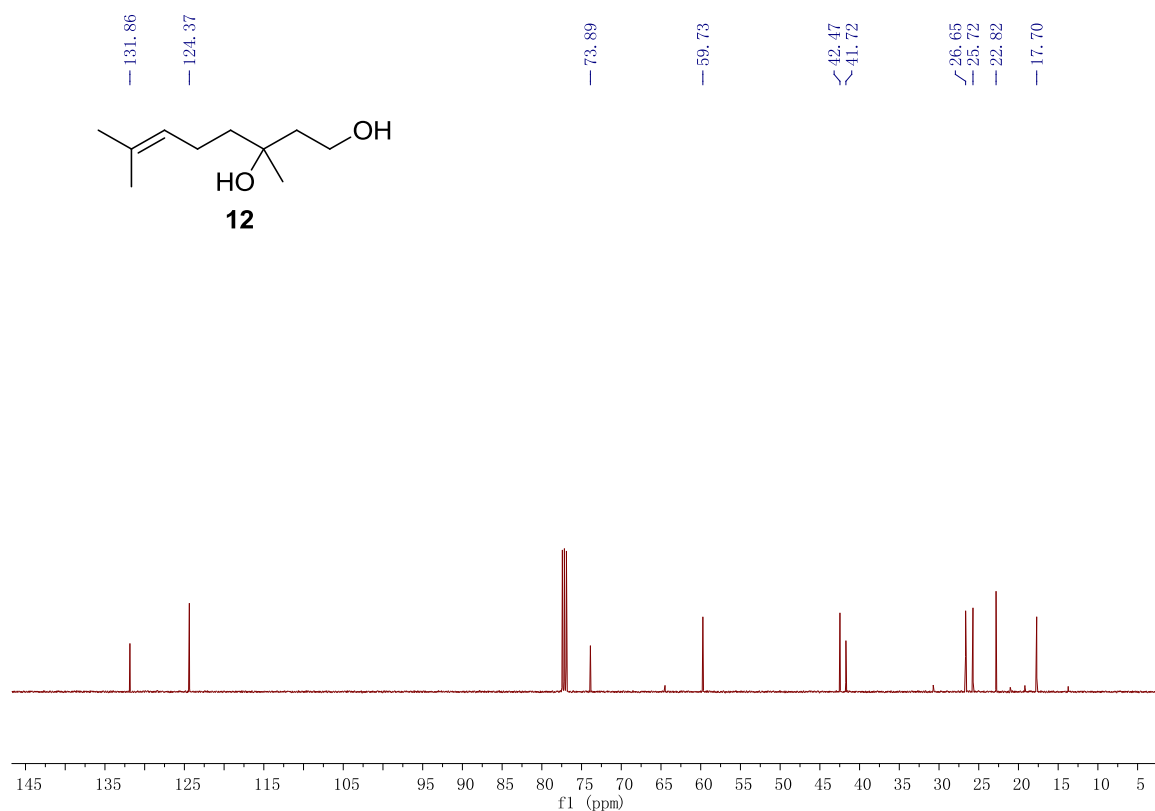**Figure S55.** HRMS of compound **12**.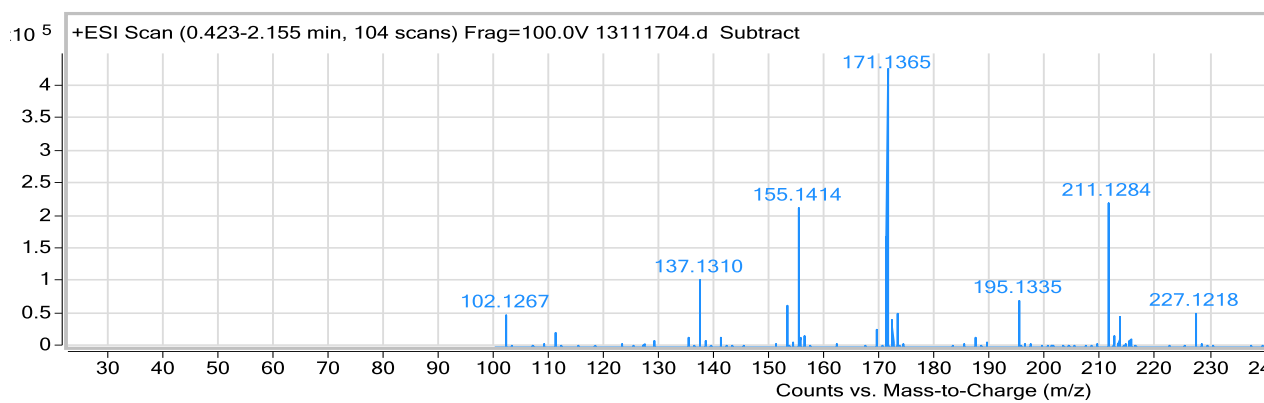

**Figure S56.**  $^1\text{H}$  NMR spectrum of compound **13**.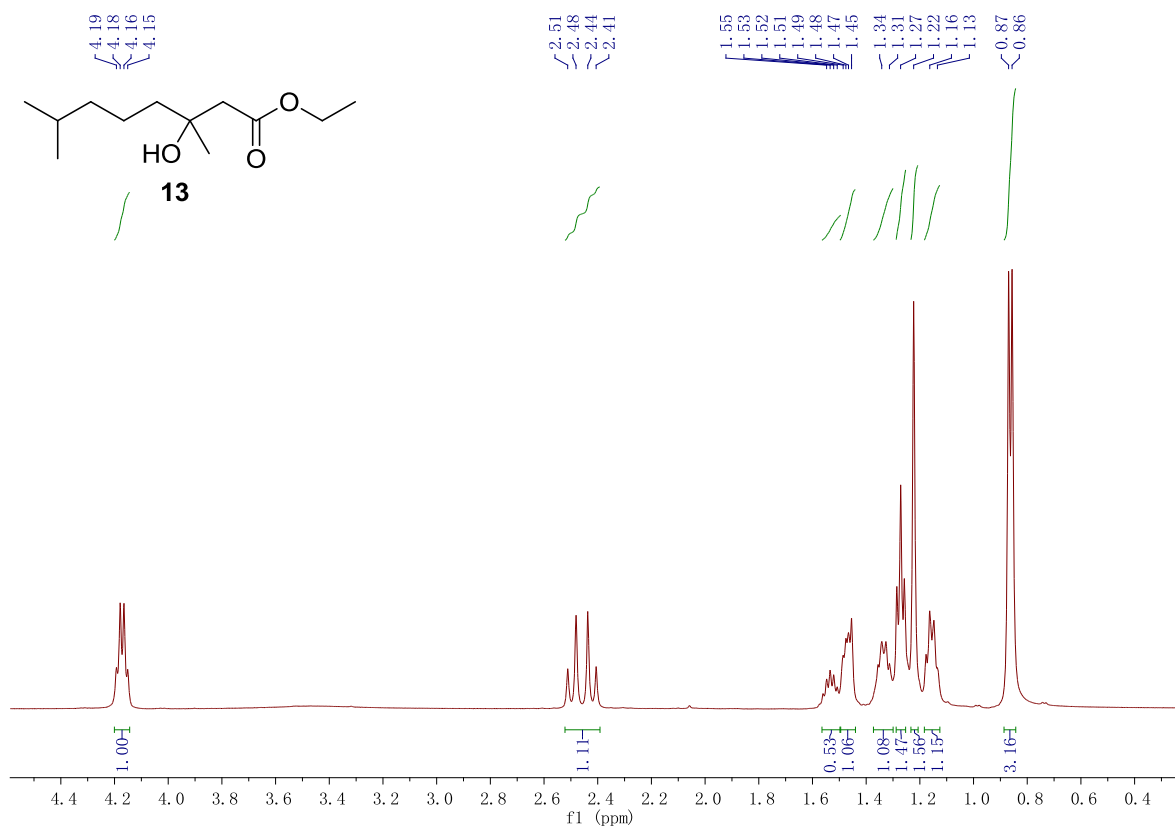**Figure S57.**  $^{13}\text{C}$  NMR spectrum of compound **13**.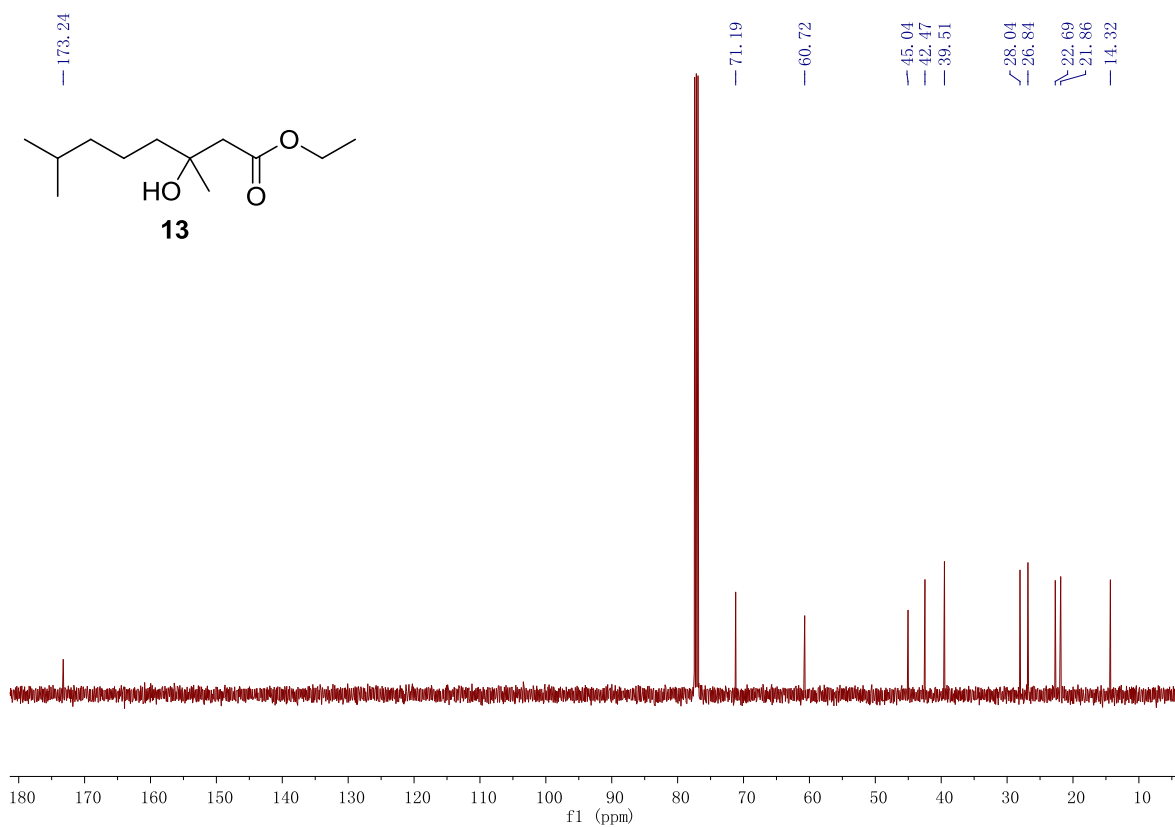

Figure S58. HRMS of compound 13.

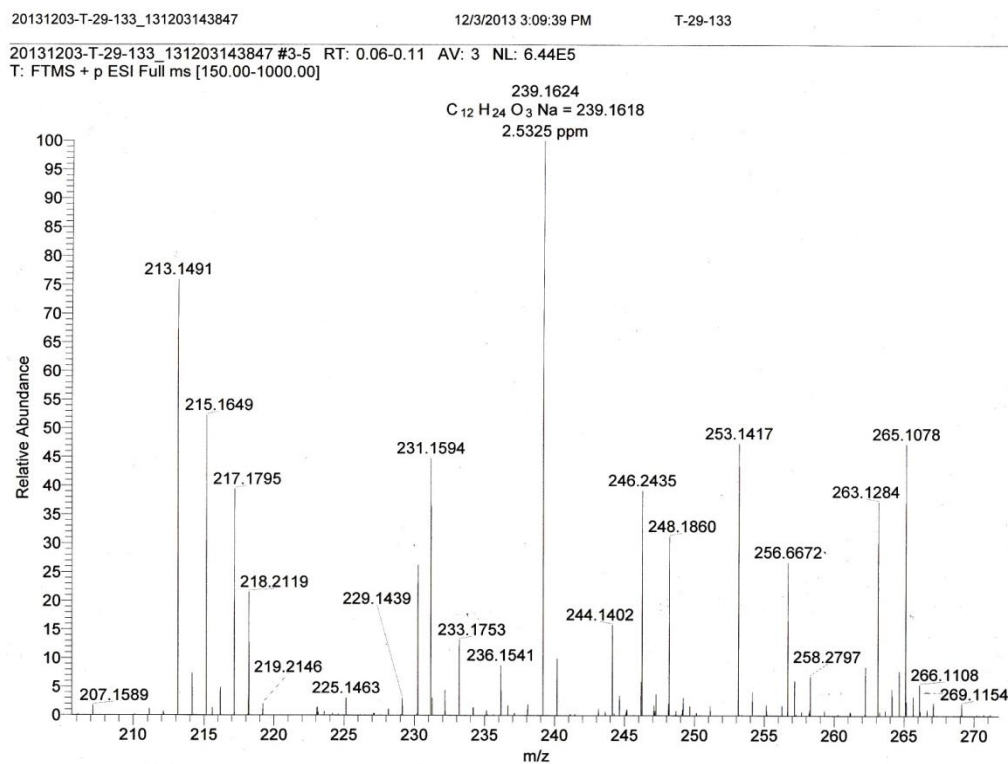Figure S59. <sup>1</sup>H NMR spectrum of compound 14.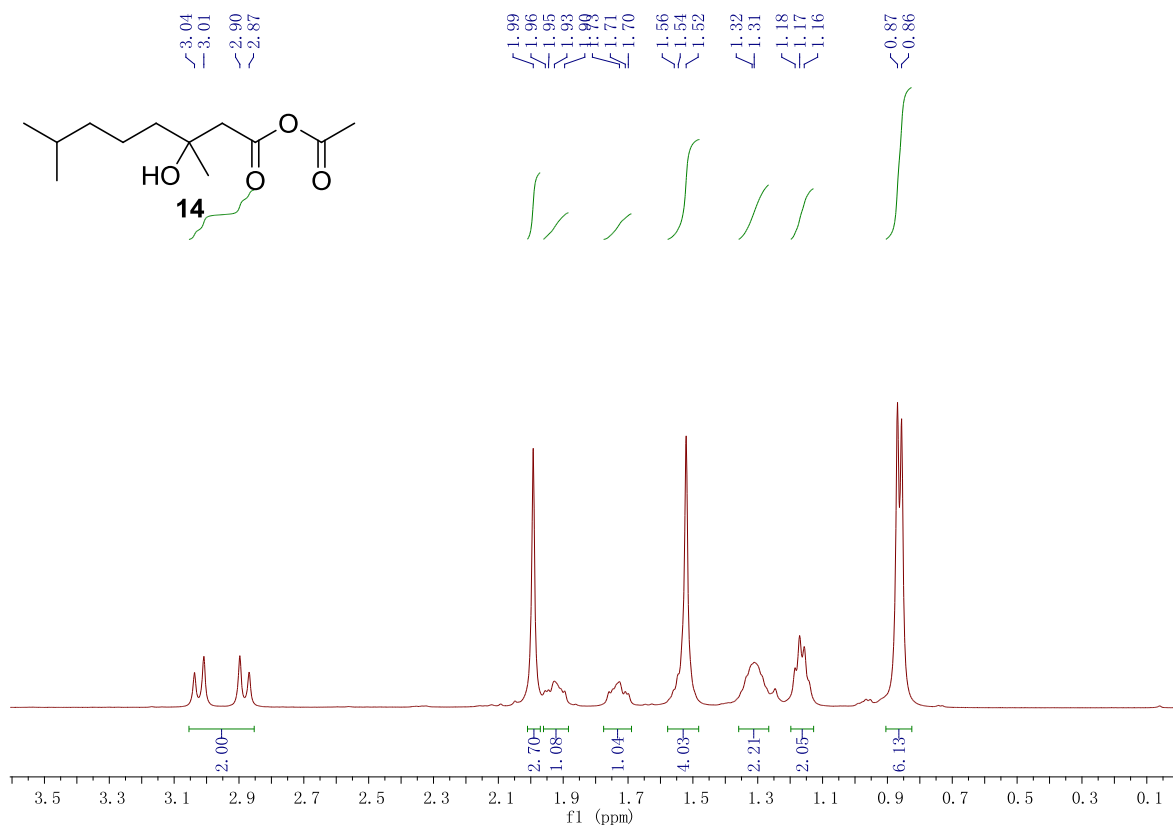



**Figure S60.**  $^{13}\text{C}$  NMR spectrum of compound **14**.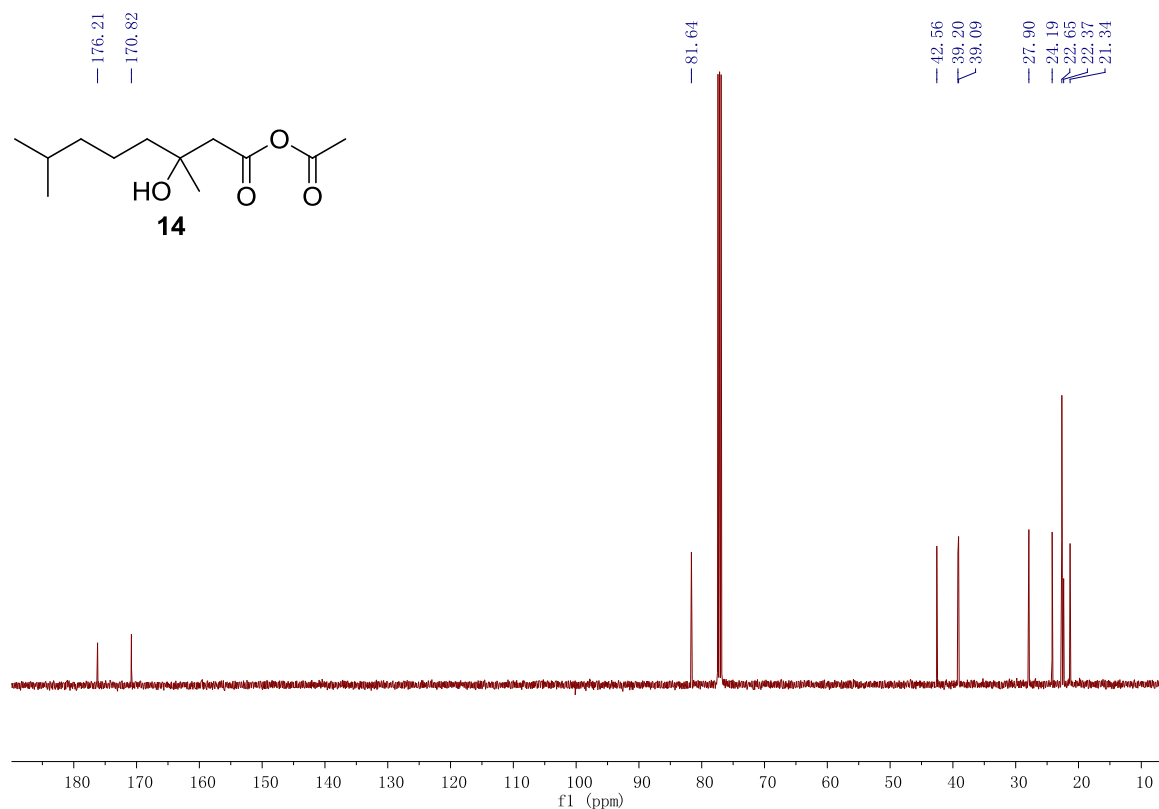**Figure S61.** HRMS of compound **14**.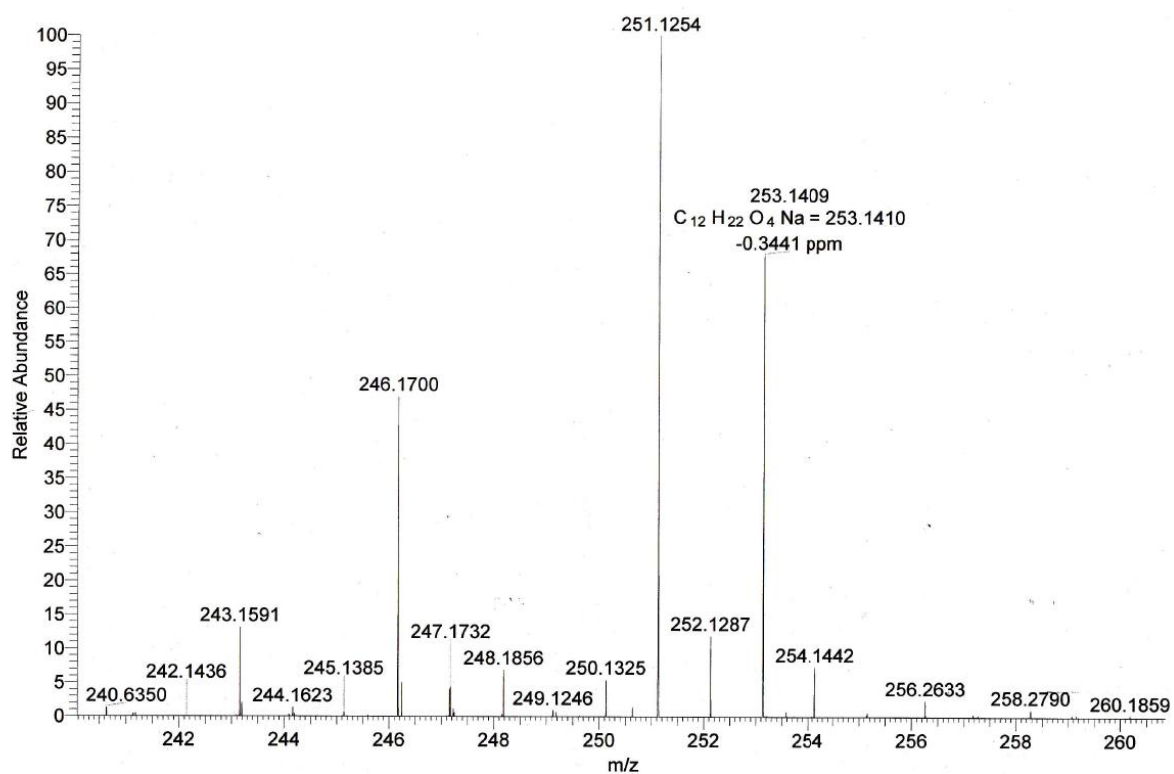

**Figure S62.**  $^1\text{H}$  NMR spectrum of compound **15**.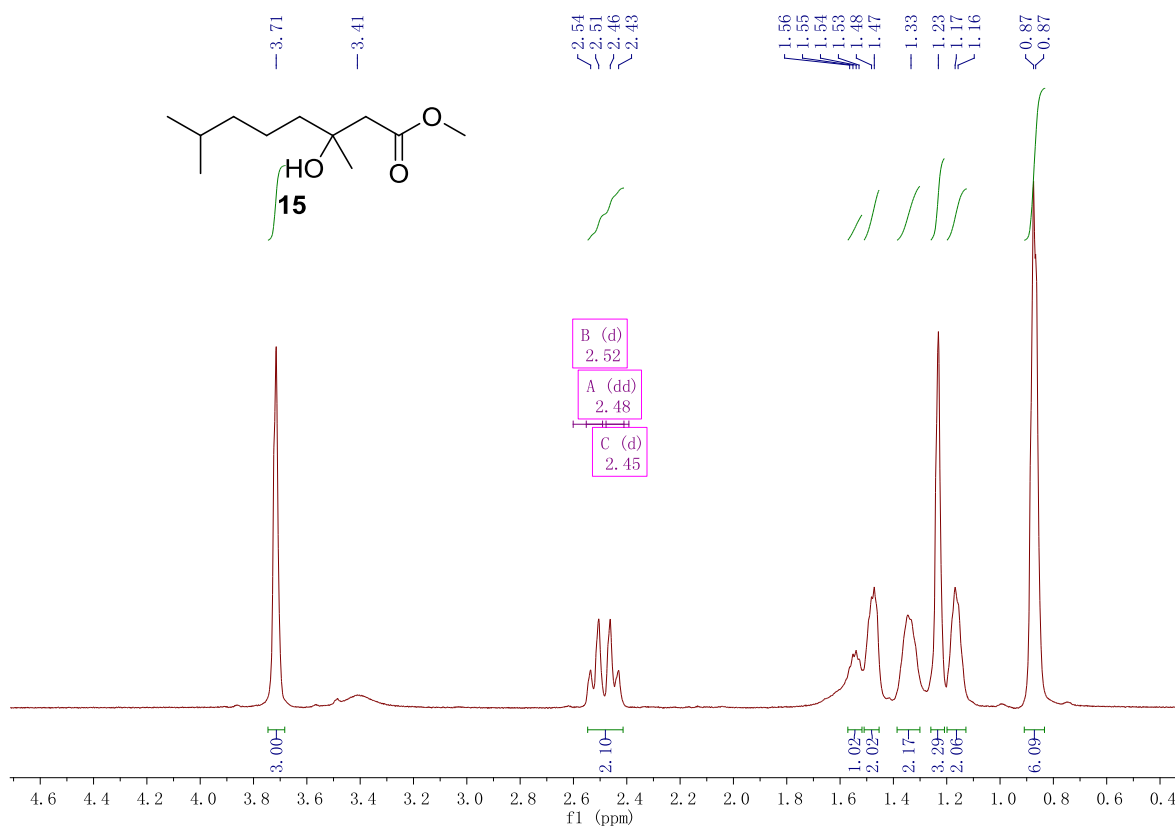**Figure S63.**  $^{13}\text{C}$  NMR spectrum of compound **15**.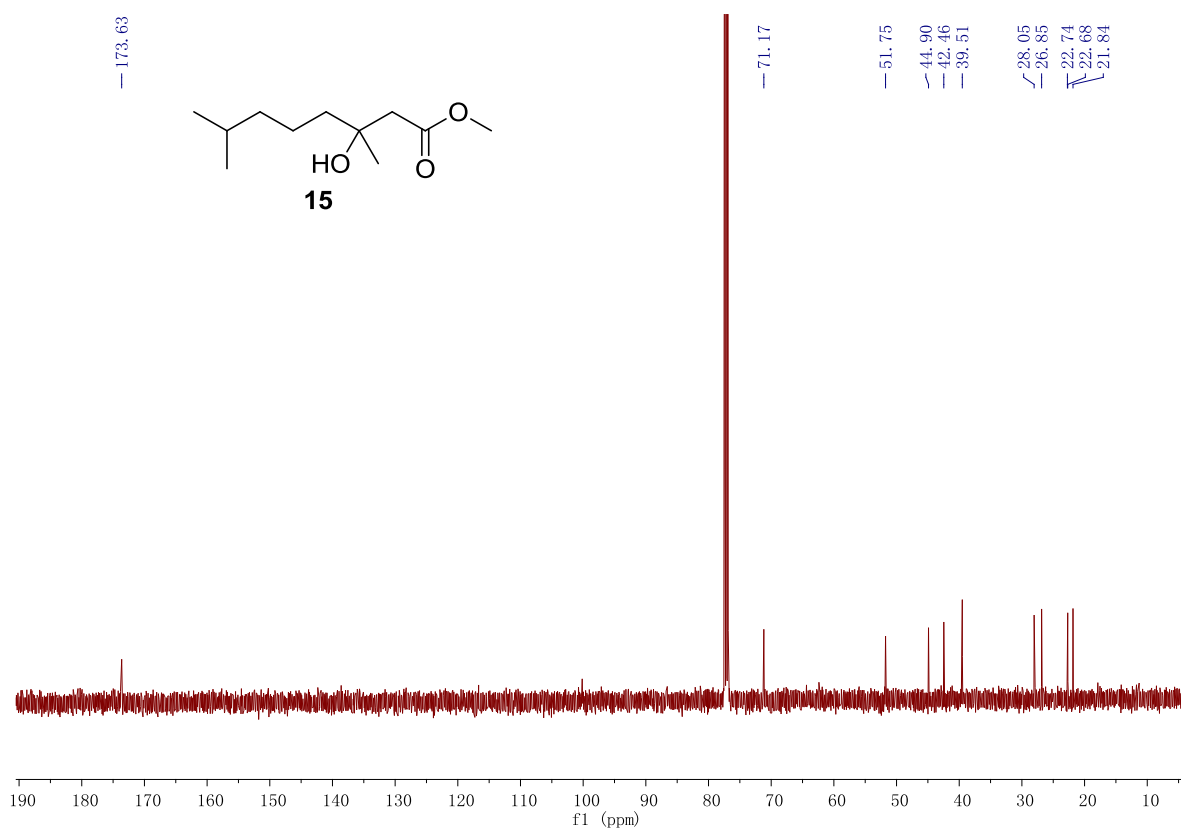

Figure S64. HRMS of compound 15.

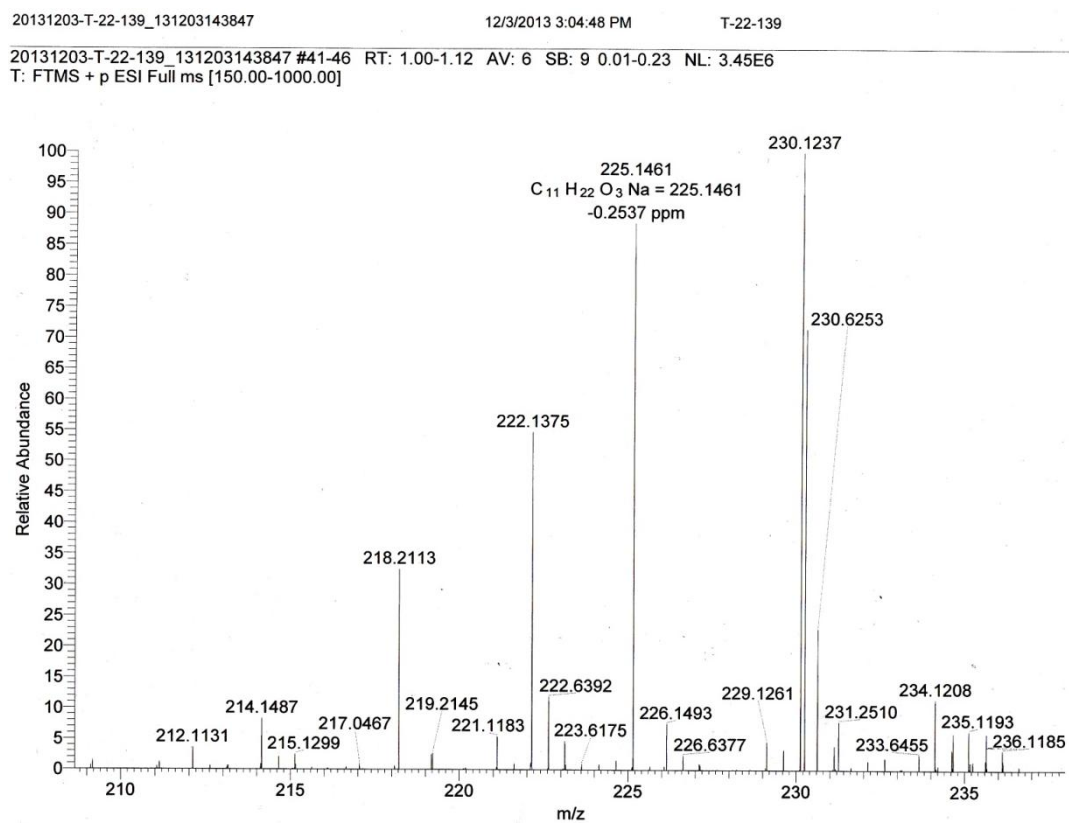Figure S65.  $^1H$  NMR spectrum of compound 16.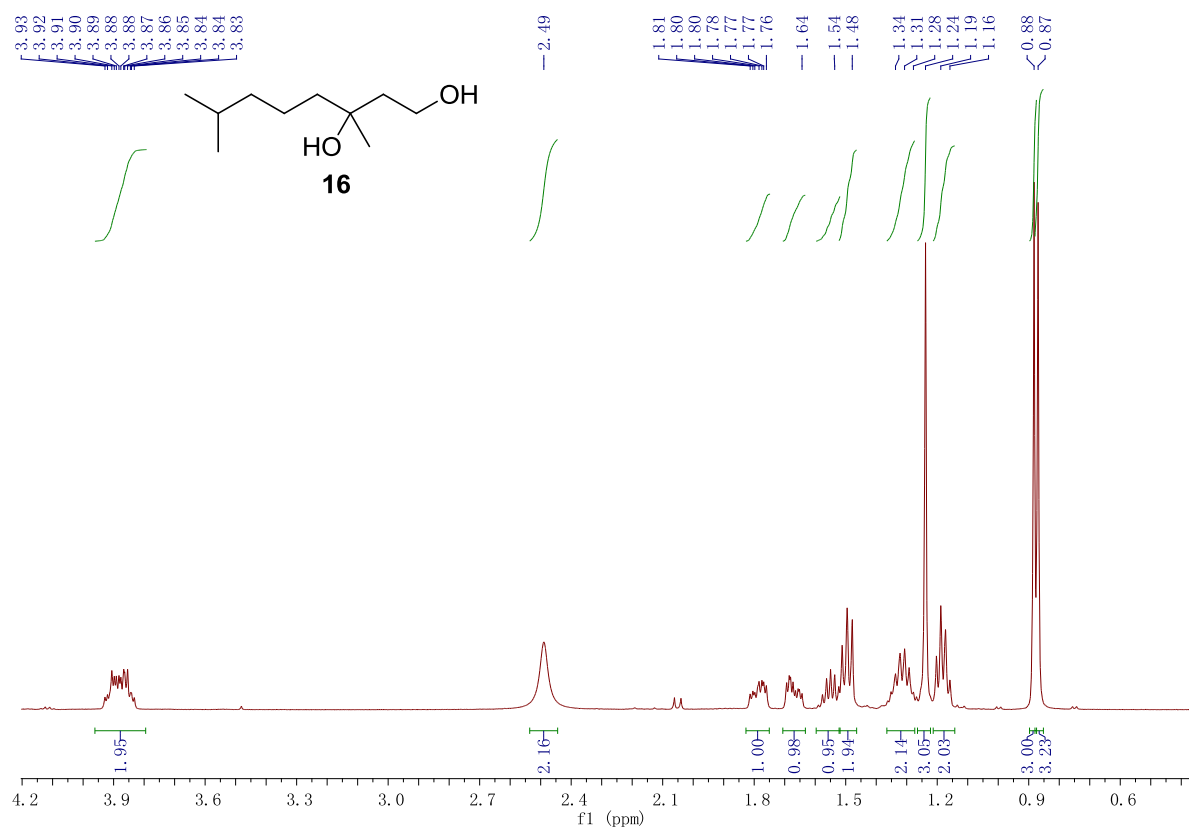

**Figure S66.**  $^{13}\text{C}$  NMR spectrum of compound **16**.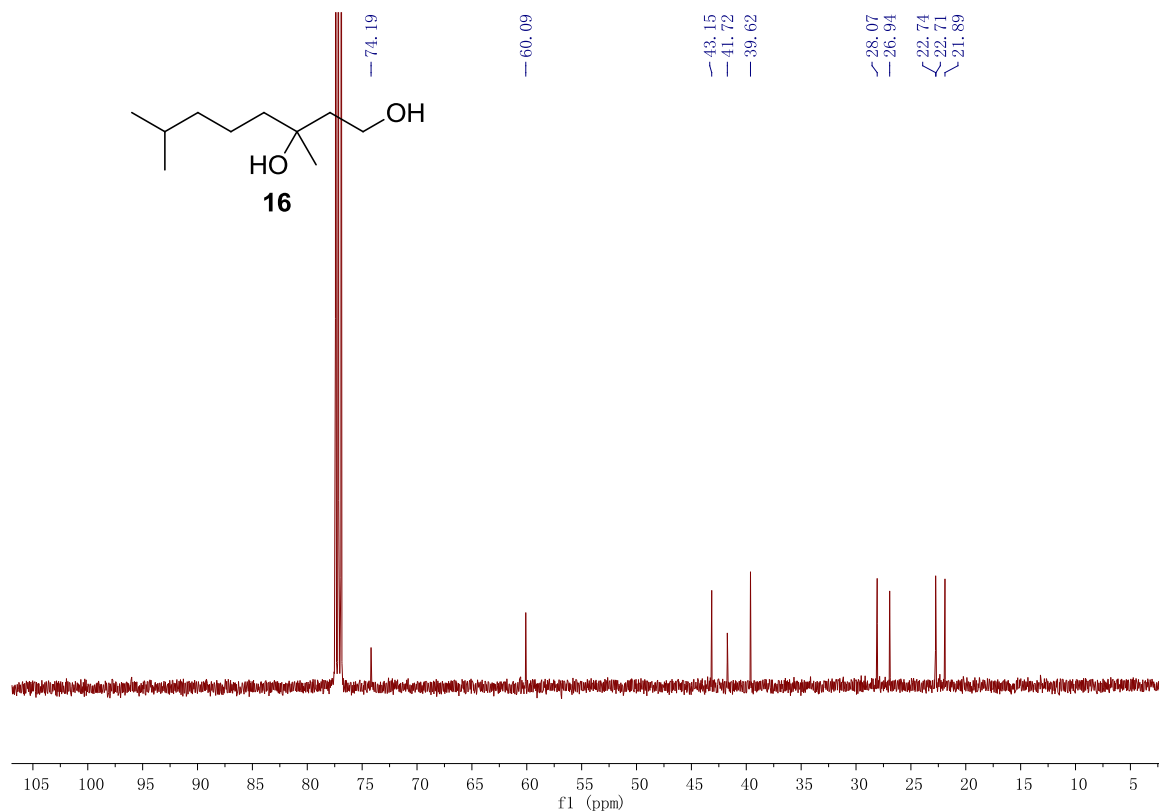**Figure S67.** HRMS of compound **16**.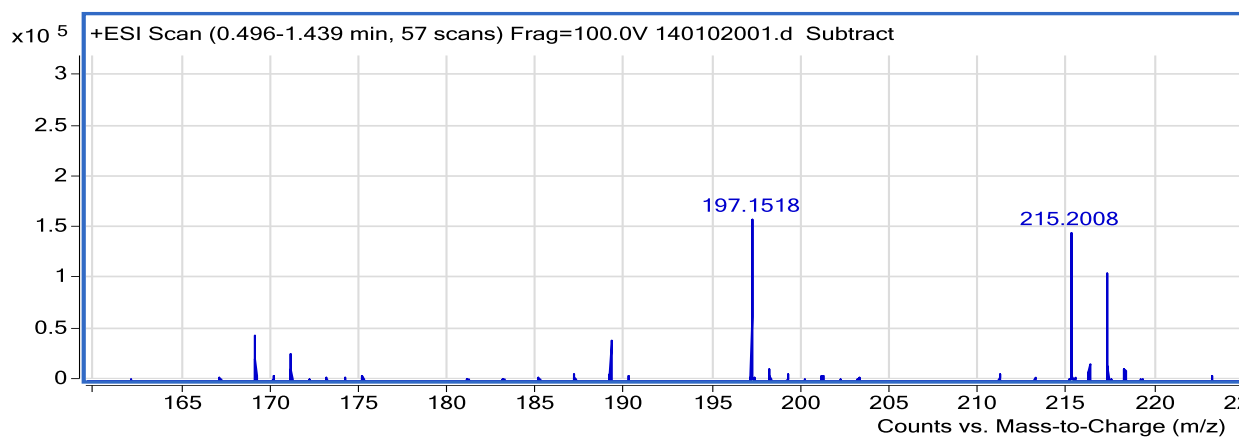

**Figure S68.**  $^1\text{H}$  NMR spectrum of compound **17**.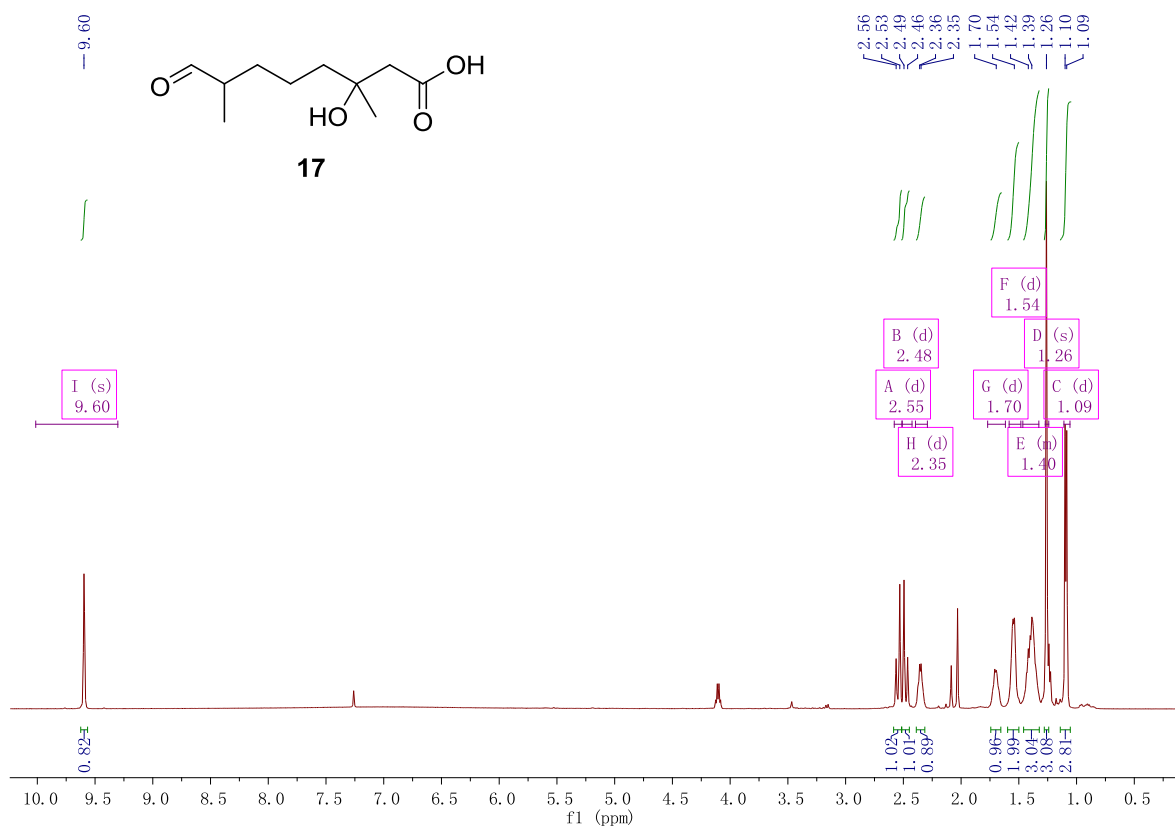**Figure S69.**  $^{13}\text{C}$  NMR spectrum of compound **17**.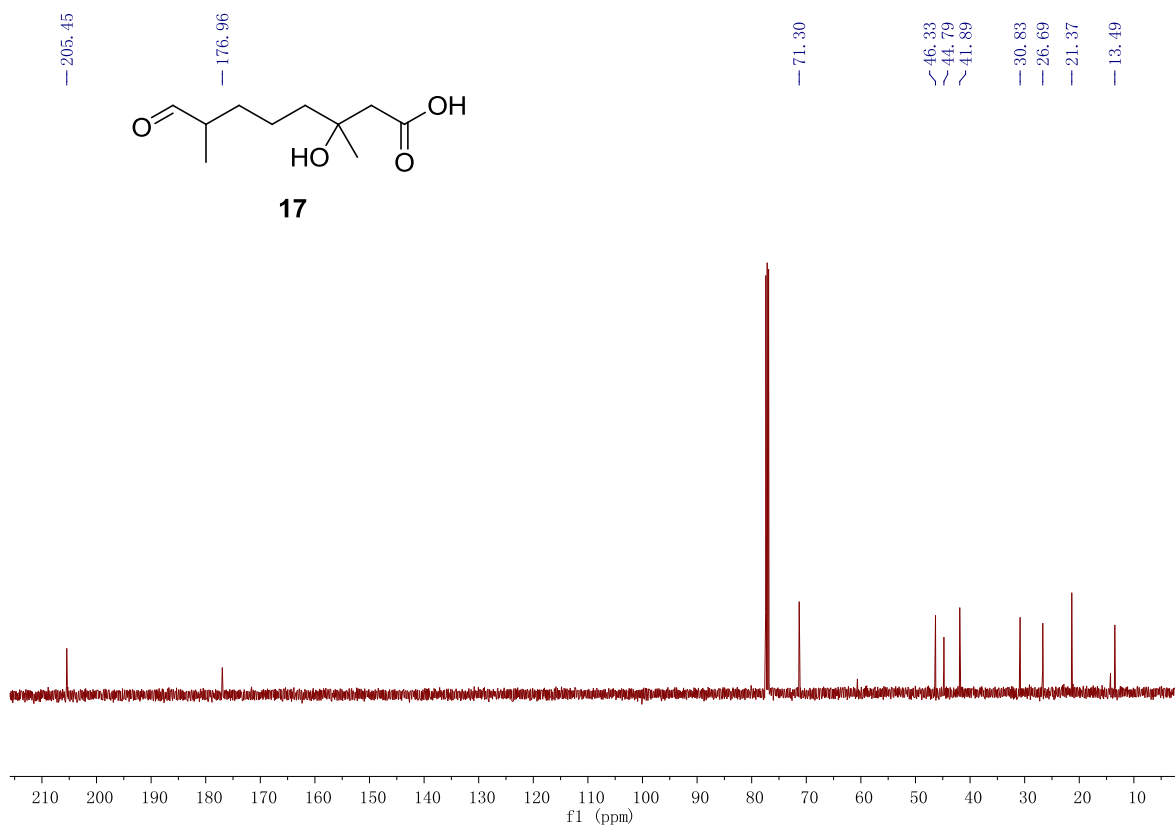

Figure S70. HRMS of compound 17.

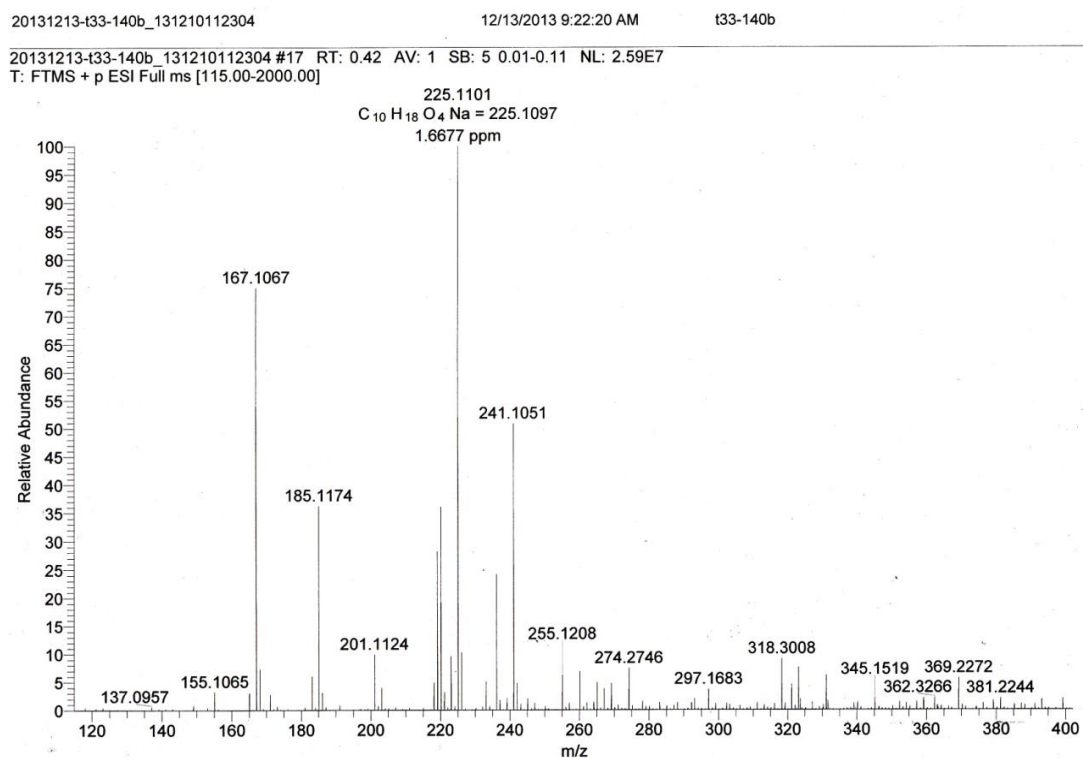Figure S71. <sup>1</sup>H NMR spectrum of compound 18.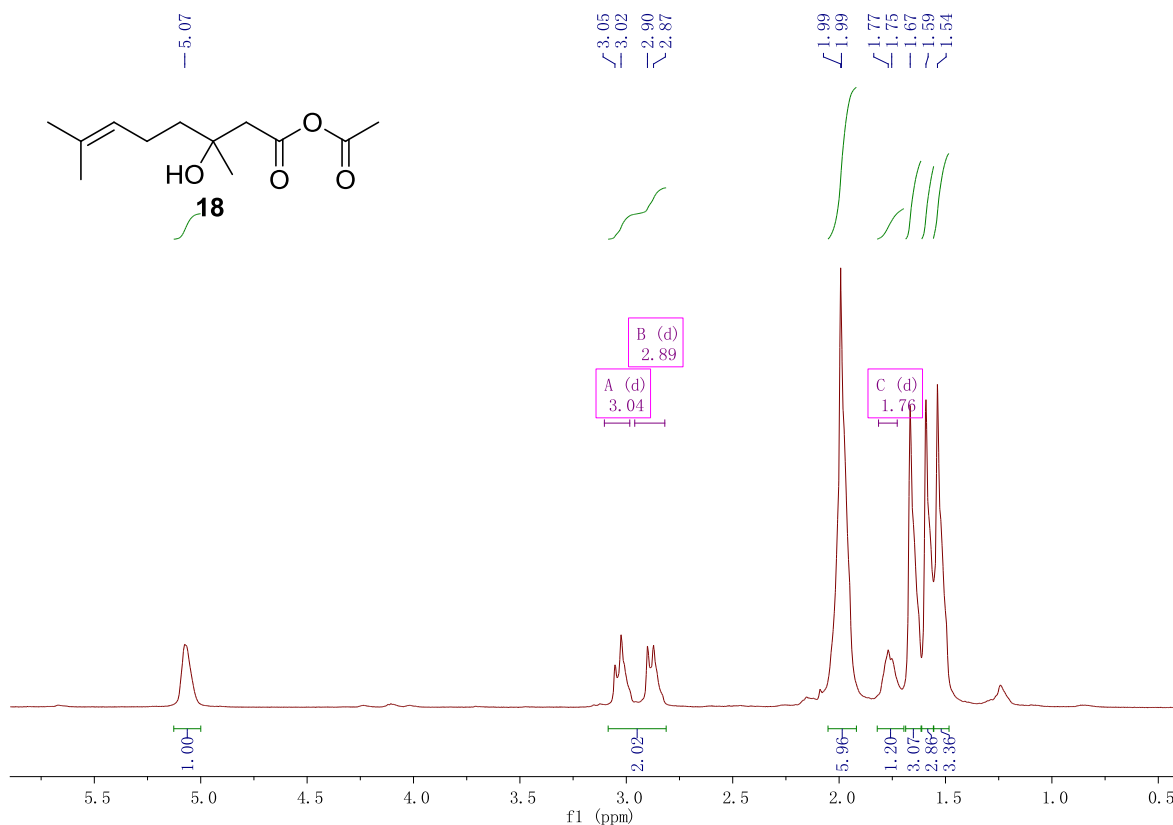

**Figure S72.**  $^{13}\text{C}$  NMR spectrum of compound **18**.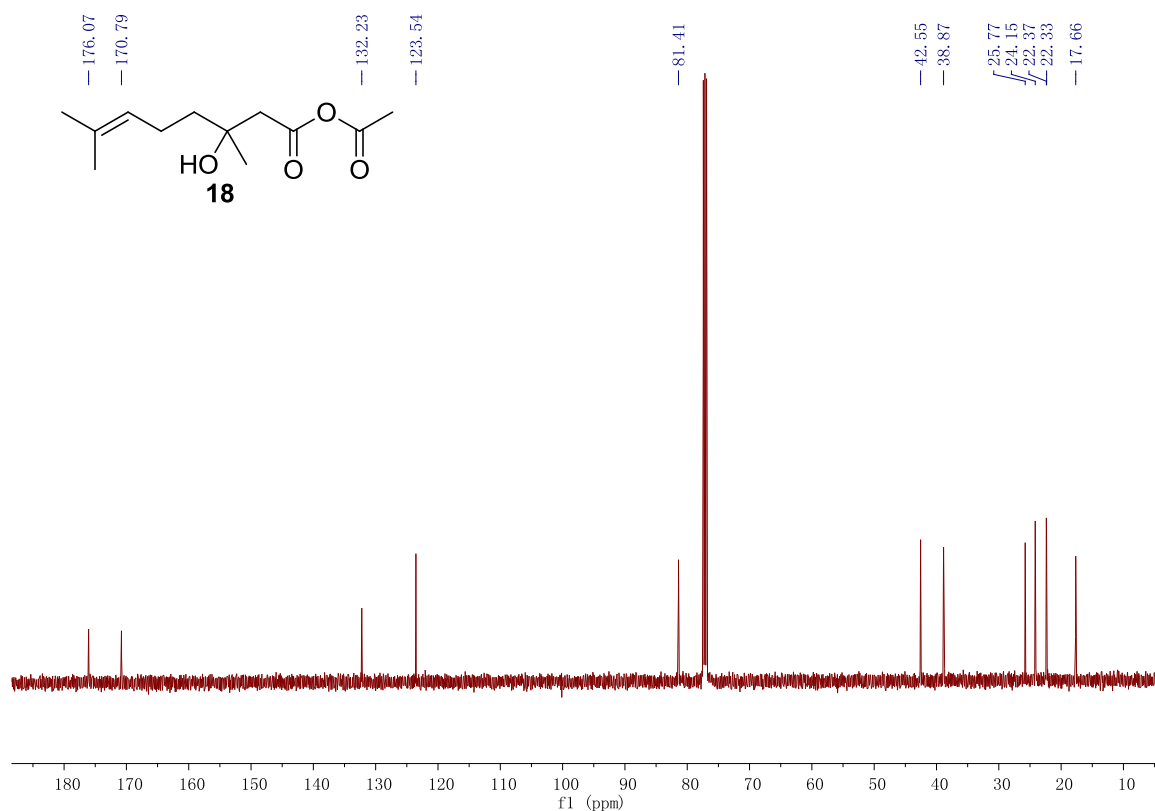**Figure S73.** HRMS of compound **18**.

20131225-T-36-155B\_131226091650

12/26/2013 9:21:49 AM

T-36-155B

20131225-T-36-155B\_131226091650 #76-81 RT: 0.63-0.67 AV: 6 NL: 2.31E6

T: FTMS + p ESI Full ms [100.00-1000.00]

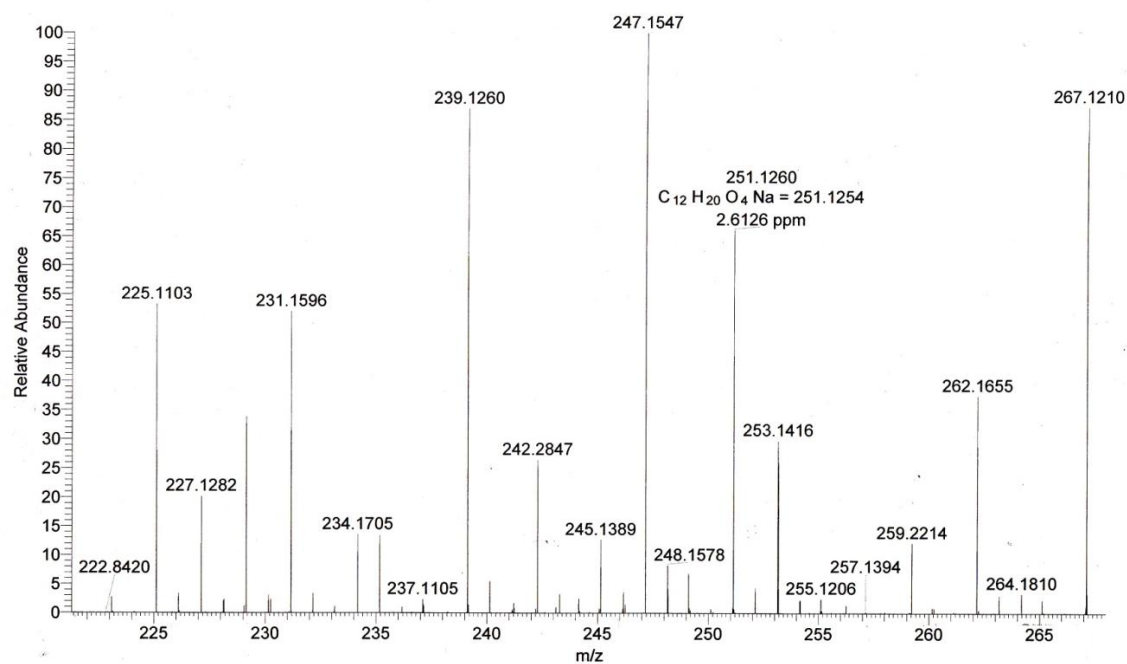

**Figure S74.**  $^1\text{H}$  NMR spectrum of compound **19**.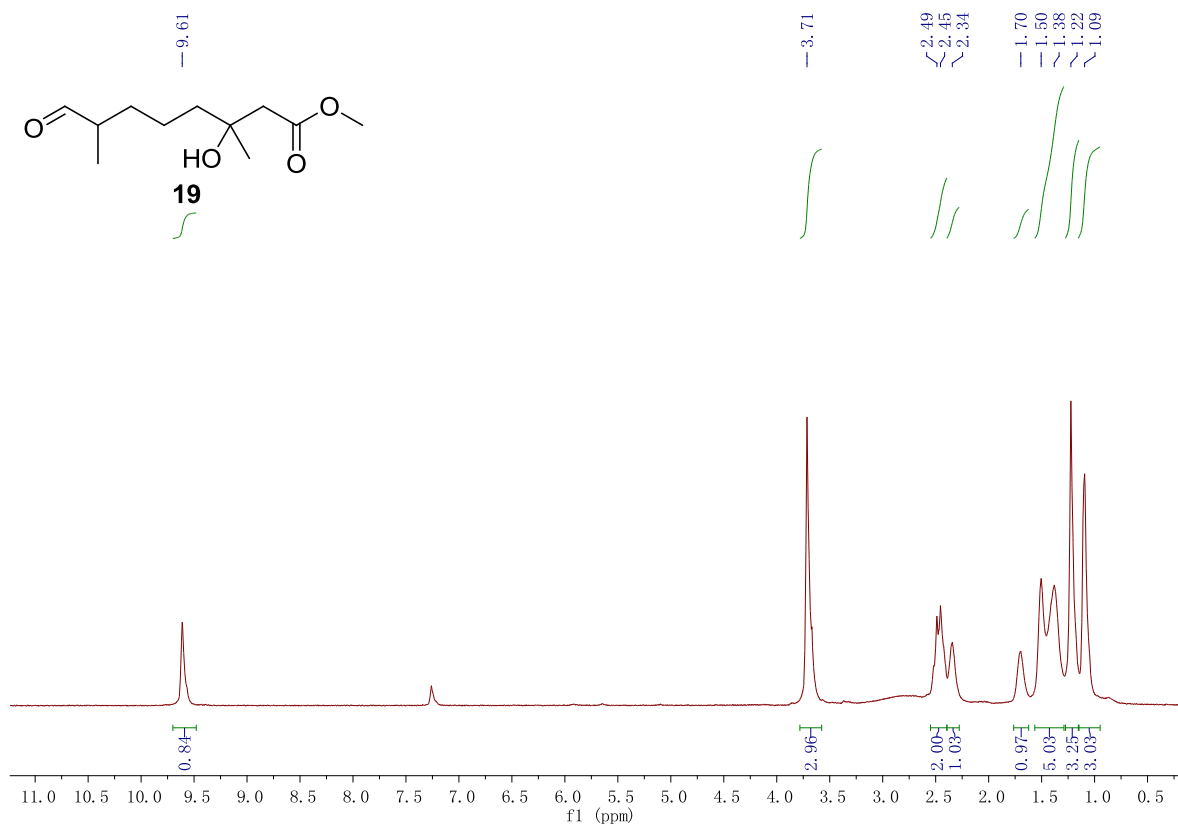**Figure S75.**  $^{13}\text{C}$  NMR spectrum of compound **19**.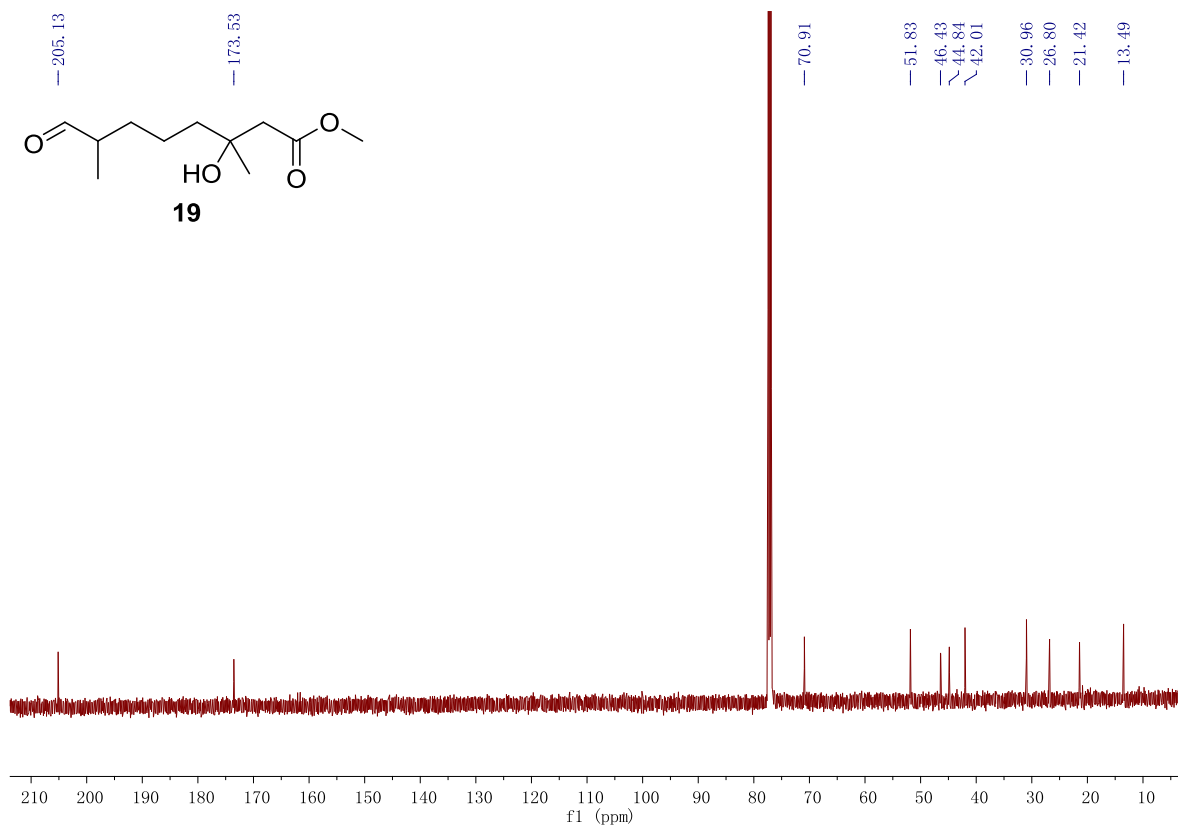



Figure S76. HRMS of compound 19.

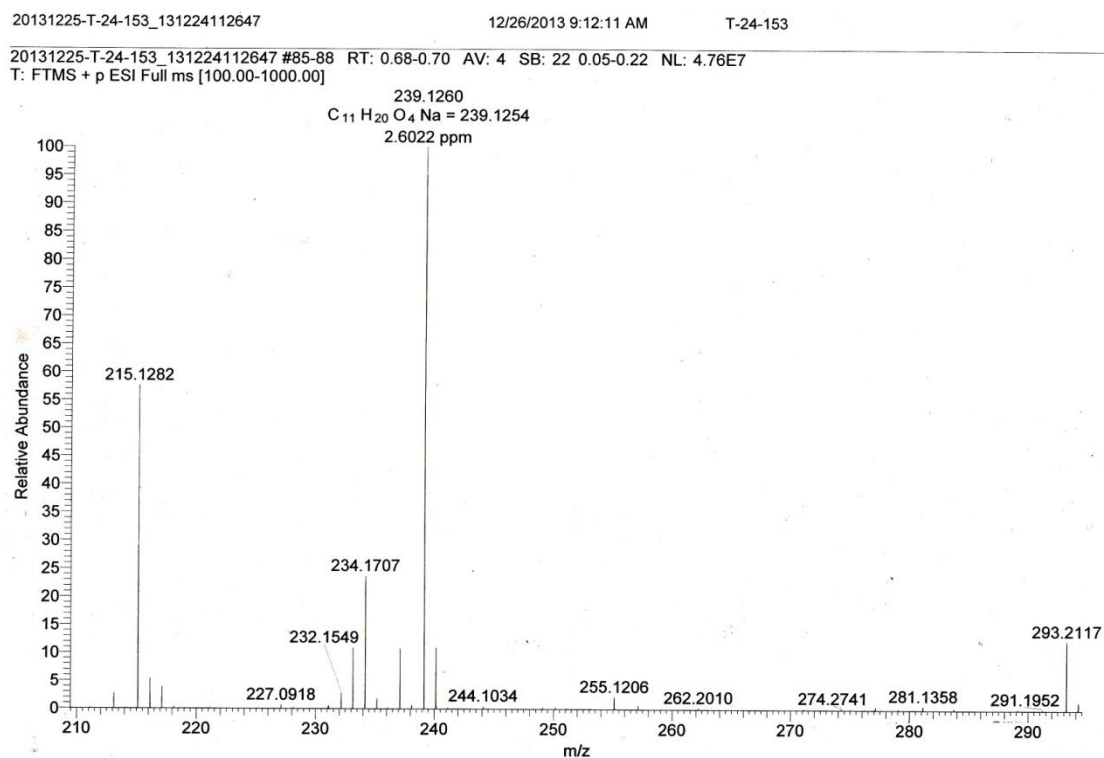Figure S77. <sup>1</sup>H NMR spectrum of compound 20.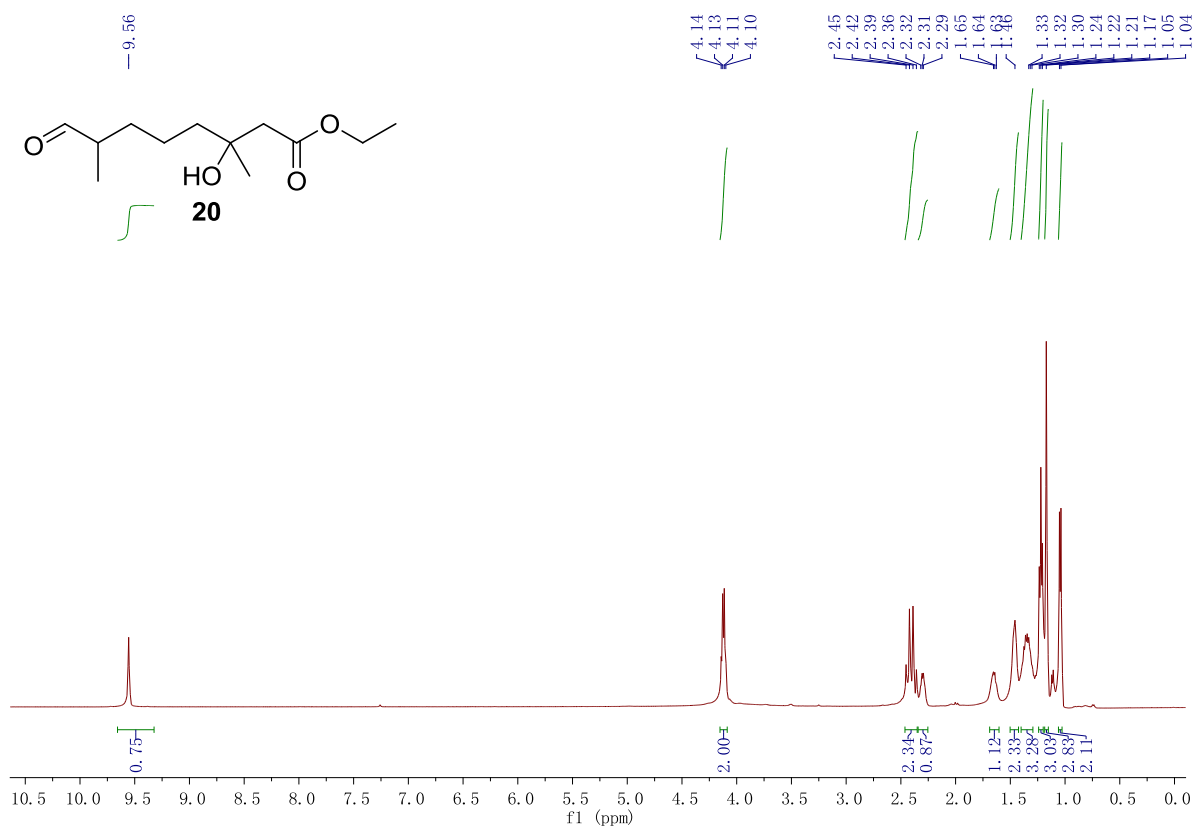

**Figure S78.**  $^{13}\text{C}$  NMR spectrum of compound **20**.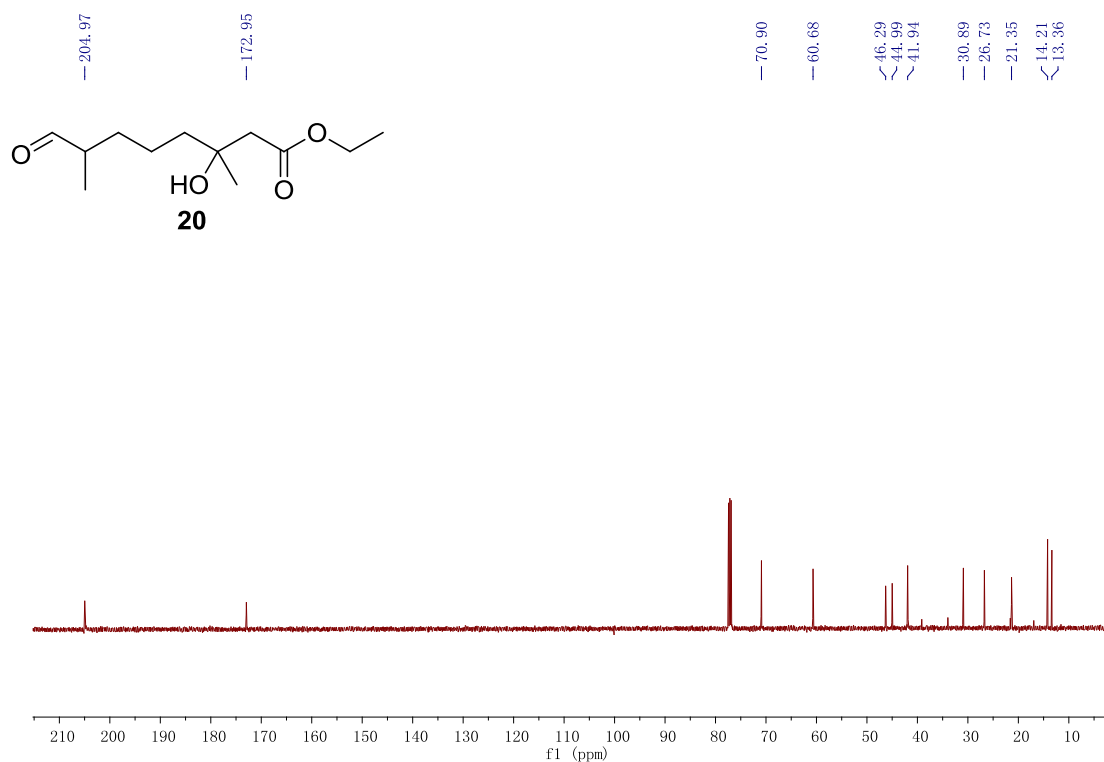**Figure S79.** HRMS of compound **20**.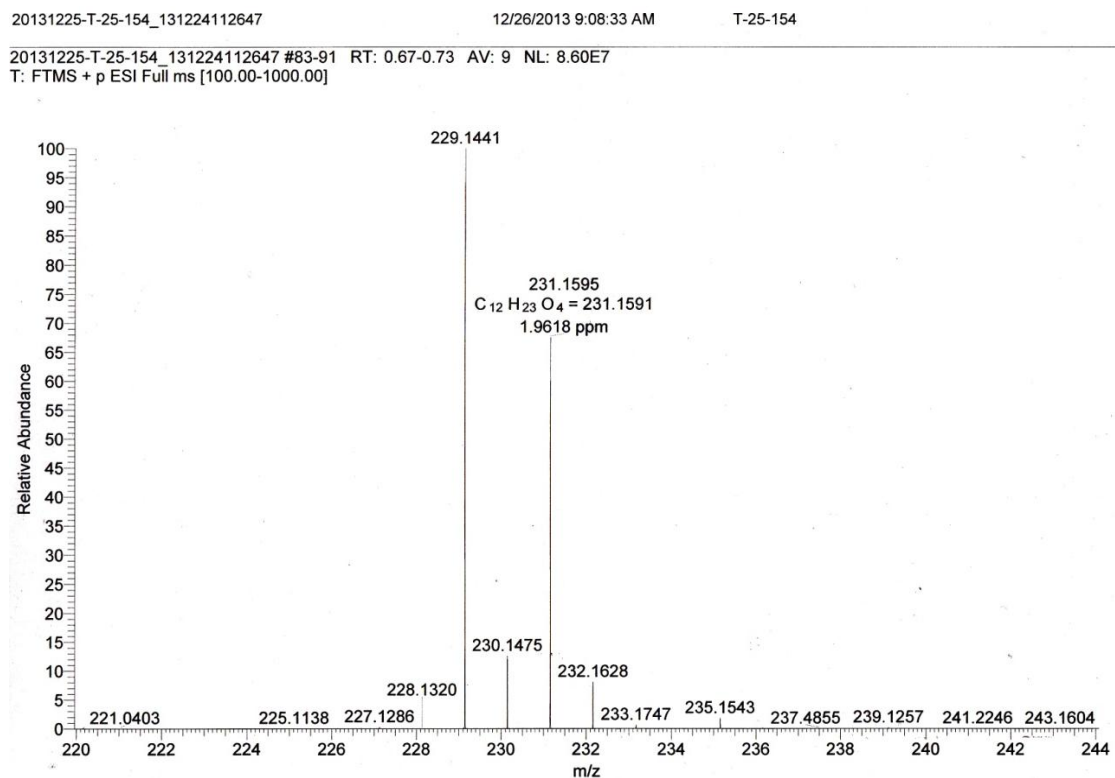

Supplement: s1 [file s1]
